# Supplementary material for: USP16 counteracts mono-ubiquitination of RPS27a and promotes maturation of the 40S ribosomal subunit
Source: eLife. 2020 Mar 4;9:e54435. doi: 10.7554/eLife.54435 (PMC7065907; doi:10.7554/eLife.54435)
Supplement: Supplementary file 2. — S2-2 Spectral counts of proteins identified on RIOK1(WT)- and RIOK1(kd)-StHA after normalization to protein length (spectral counts per 1000 amino acids) and to spectral counts of the RIOK1(WT)-StHA bait in replicate II after filtering against the HASt-GFP control. S2-3 Comparison of the normalized spectral counts of proteins identified on RIOK1(WT)- and RIOK1(kd)-StHA. Proteins with an adjusted p value < 0.05 and an at least twofold enrichment on RIOK1(kd)-StHA (log2FC (kd vs. WT)>1) are shown in black, proteins with lower significance are depicted in dark gray (adjusted p value < 0.05 but with a log2FC < 1) or light gray (adjusted p value > 0.05). [file elife-54435-supp2.xlsx]

## Sheet: Identified proteins
Table S2-1. Spectral counts of proteins identified on HASt-GFP, RIOK1(WT)- and RIOK1(kd)-StHA1
UniProt Name	Description	HASt-GFP_I	HASt-GFP_II	HASt-GFP_III	RIOK1-StHA_I	RIOK1-StHA_II	RIOK1-StHA_III	RIOK1(kd)-StHA_I	RIOK1(kd)-StHA_II	RIOK1(kd)-StHA_III
RIOK1_HUMAN	Serine/threonine-protein kinase RIO1	0	0	0	420	443	295	343	414	397
ANM5_HUMAN	Protein arginine N-methyltransferase 5	0	0	0	172	187	114	145	237	228
ATX2L_HUMAN	Ataxin-2-like protein	75	61	63	110	103	69	106	106	110
MEP50_HUMAN	Methylosome protein 50	0	0	0	103	114	71	88	116	125
WIZ_HUMAN	Protein Wiz	0	0	0	75	78	41	62	83	74
K2C1_HUMAN	Keratin, type II cytoskeletal 1	199	119	109	66	99	95	97	101	72
K1C9_HUMAN	Keratin, type I cytoskeletal 9	183	89	94	58	73	66	67	75	58
ODB2_HUMAN	Lipoamide acyltransferase component of branched-chain alpha-keto acid dehydrogenase complex, mitochondrial	37	34	25	58	53	42	44	59	51
GTF2I_HUMAN	General transcription factor II-I	3	3	3	54	67	34	46	61	63
RS3A_HUMAN	40S ribosomal protein S3a	1	2	1	51	54	25	76	91	89
CSK2B_HUMAN	Casein kinase II subunit beta	0	0	0	47	46	21	33	40	40
K1C10_HUMAN	Keratin, type I cytoskeletal 10	122	61	51	47	61	47	67	69	55
CSK22_HUMAN	Casein kinase II subunit alpha'	0	0	0	45	54	36	36	50	44
NUCL_HUMAN	Nucleolin	3	4	0	44	46	24	93	103	103
HNRH1_HUMAN	Heterogeneous nuclear ribonucleoprotein H	0	0	0	40	43	23	38	40	34
RS19_HUMAN	40S ribosomal protein S19	2	1	1	37	46	31	68	59	62
HSP7C_HUMAN	Heat shock cognate 71 kDa protein	14	32	19	34	28	15	35	42	34
K22E_HUMAN	Keratin, type II cytoskeletal 2 epidermal	93	52	49	34	74	44	65	59	45
RTCB_HUMAN	tRNA-splicing ligase RtcB homolog	1	0	0	34	40	19	42	41	50
BIP_HUMAN	Endoplasmic reticulum chaperone BiP	21	14	15	32	38	23	36	34	32
E41L3_HUMAN	Band 4.1-like protein 3	0	0	1	31	26	15	20	39	26
EIF3A_HUMAN	Eukaryotic translation initiation factor 3 subunit A	1	0	0	31	39	9	14	47	44
LRC47_HUMAN	Leucine-rich repeat-containing protein 47	0	0	0	30	35	13	84	102	88
RS7_HUMAN	40S ribosomal protein S7	0	1	0	30	32	15	57	59	60
ALBU_HUMAN	Serum albumin	26	33	20	29	23	18	20	36	28
DDX6_HUMAN	Probable ATP-dependent RNA helicase DDX6	21	17	11	28	30	13	26	36	34
DDX1_HUMAN	ATP-dependent RNA helicase DDX1	0	0	0	27	43	17	44	72	62
RS3_HUMAN	40S ribosomal protein S3	2	1	1	27	37	15	64	71	64
NOB1_HUMAN	RNA-binding protein NOB1	0	0	0	26	29	11	48	50	52
PAIRB_HUMAN	Plasminogen activator inhibitor 1 RNA-binding protein	1	0	1	26	31	18	53	68	60
LS14A_HUMAN	Protein LSM14 homolog A	0	0	0	25	20	15	30	30	29
ODBA_HUMAN	2-oxoisovalerate dehydrogenase subunit alpha, mitochondrial	5	12	7	25	28	13	20	33	31
PYC_HUMAN	Pyruvate carboxylase, mitochondrial	20	14	13	25	42	9	26	44	38
PIMT_HUMAN	Protein-L-isoaspartate(D-aspartate) O-methyltransferase	8	7	5	24	24	16	22	23	24
RS13_HUMAN	40S ribosomal protein S13	0	0	0	24	18	7	42	44	43
RS16_HUMAN	40S ribosomal protein S16	1	0	1	24	24	17	33	30	31
RS2_HUMAN	40S ribosomal protein S2	1	2	1	23	26	14	44	51	46
ICLN_HUMAN	Methylosome subunit pICln	0	0	0	21	23	17	21	30	24
RS17_HUMAN	40S ribosomal protein S17	0	1	2	21	22	7	38	47	44
RS24_HUMAN	40S ribosomal protein S24	0	0	0	21	16	7	32	46	41
EIF3I_HUMAN	Eukaryotic translation initiation factor 3 subunit I	2	0	1	20	18	7	14	15	20
EWS_HUMAN	RNA-binding protein EWS	0	0	0	20	22	9	22	22	23
HNRPU_HUMAN	Heterogeneous nuclear ribonucleoprotein U	6	1	2	20	31	10	15	32	22
RS14_HUMAN	40S ribosomal protein S14	3	2	1	20	17	13	28	27	29
RS21_HUMAN	40S ribosomal protein S21	3	1	2	20	20	13	41	32	34
RS6_HUMAN	40S ribosomal protein S6	0	1	1	20	20	14	25	54	41
UBE2O_HUMAN	(E3-independent) E2 ubiquitin-conjugating enzyme	0	0	0	20	31	15	20	20	28
RSSA_HUMAN	40S ribosomal protein SA	2	3	2	19	19	13	31	38	35
NUFP2_HUMAN	Nuclear fragile X mental retardation-interacting protein 2	7	6	3	18	23	9	19	32	26
RS11_HUMAN	40S ribosomal protein S11	2	1	1	18	23	10	33	35	34
RS18_HUMAN	40S ribosomal protein S18	0	0	0	18	22	5	24	42	34
RS8_HUMAN	40S ribosomal protein S8	2	1	2	18	18	12	22	35	29
SPT5H_HUMAN	Transcription elongation factor SPT5	0	0	0	18	22	10	17	26	25
TIF1B_HUMAN	Transcription intermediary factor 1-beta	8	7	5	18	23	8	16	24	20
TSR1_HUMAN	Pre-rRNA-processing protein TSR1 homolog	0	0	0	18	29	12	41	57	60
BCKD_HUMAN	[3-methyl-2-oxobutanoate dehydrogenase [lipoamide]] kinase, mitochondrial	8	2	3	17	20	10	18	23	30
PPAC_HUMAN	Low molecular weight phosphotyrosine protein phosphatase	0	0	0	17	14	11	2	2	2
RS5_HUMAN	40S ribosomal protein S5	1	0	0	17	23	10	30	36	28
CIRBP_HUMAN	Cold-inducible RNA-binding protein	0	0	0	16	15	17	13	19	17
RS23_HUMAN	40S ribosomal protein S23	0	0	0	16	16	8	21	28	25
SFPQ_HUMAN	Splicing factor, proline- and glutamine-rich	0	0	0	16	28	13	13	11	17
SND1_HUMAN	Staphylococcal nuclease domain-containing protein 1	1	0	0	16	18	9	26	37	33
DHX9_HUMAN	ATP-dependent RNA helicase A	0	0	0	15	23	13	18	26	19
NONO_HUMAN	Non-POU domain-containing octamer-binding protein	0	0	0	15	19	14	12	14	15
RS10_HUMAN	40S ribosomal protein S10	1	0	0	15	16	7	29	32	23
RS15A_HUMAN	40S ribosomal protein S15a	1	0	0	15	19	6	22	27	28
RS4X_HUMAN	40S ribosomal protein S4, X isoform	1	0	0	15	16	10	35	32	36
RTRAF_HUMAN	RNA transcription, translation and transport factor protein	0	0	0	15	19	10	15	25	25
SMD3_HUMAN	Small nuclear ribonucleoprotein Sm D3	0	0	0	15	15	11	15	17	21
ATPB_HUMAN	ATP synthase subunit beta, mitochondrial	13	12	7	14	15	3	13	18	16
CLPB_HUMAN	Caseinolytic peptidase B protein homolog	9	4	5	14	23	8	20	28	24
HNRPM_HUMAN	Heterogeneous nuclear ribonucleoprotein M	5	2	1	14	19	3	14	17	18
LARP1_HUMAN	La-related protein 1	0	0	0	14	20	8	24	40	36
SET_HUMAN	Protein SET	10	15	11	14	17	12	18	22	23
SC16A_HUMAN	Protein transport protein Sec16A	11	5	10	12	17	5	9	10	10
RACK1_HUMAN	Receptor of activated protein C kinase 1	2	0	1	11	15	8	21	35	30
RS28_HUMAN	40S ribosomal protein S28	0	0	0	11	16	11	18	22	19
RS9_HUMAN	40S ribosomal protein S9	0	0	0	11	17	5	21	36	34
THOC4_HUMAN	THO complex subunit 4	3	4	4	11	12	8	11	15	17
ATPA_HUMAN	ATP synthase subunit alpha, mitochondrial	13	4	4	10	9	4	10	16	15
DCD_HUMAN	Dermcidin	8	7	7	10	9	8	5	3	4
DESP_HUMAN	Desmoplakin	87	31	26	10	29	18	16	21	13
EIF3D_HUMAN	Eukaryotic translation initiation factor 3 subunit D	0	0	0	10	10	4	7	14	17
MCRI1_HUMAN	Mapk-regulated corepressor-interacting protein 1	11	7	11	10	12	9	11	15	17
ROA1_HUMAN	Heterogeneous nuclear ribonucleoprotein A1	2	2	2	10	15	10	13	11	14
A0A076FL24_9MONO	Enhanced green fluorescent protein	280	224	240	9	6	3	5	1	2
CH60_HUMAN	60 kDa heat shock protein, mitochondrial	12	8	6	9	13	1	12	18	13
FA98B_HUMAN	Protein FAM98B	0	0	0	9	10	3	6	14	13
FUBP2_HUMAN	Far upstream element-binding protein 2	1	0	0	9	10	7	9	5	7
K2C5_HUMAN	Keratin, type II cytoskeletal 5	32	19	15	9	17	15	12	19	14
LSM12_HUMAN	Protein LSM12 homolog	6	6	6	9	11	2	6	15	12
PDIP3_HUMAN	Polymerase delta-interacting protein 3	4	5	6	9	13	9	9	13	14
RS20_HUMAN	40S ribosomal protein S20	1	0	0	9	8	5	23	26	24
S10A9_HUMAN	Protein S100-A9	12	6	4	9	8	5	7	26	8
ANXA1_HUMAN	Annexin A1	10	4	3	8	2	2	5	22	5
DDX5_HUMAN	Probable ATP-dependent RNA helicase DDX5	0	0	0	8	7	5	8	9	11
FBRL_HUMAN	rRNA 2'-O-methyltransferase fibrillarin	0	0	0	8	11	6	8	6	8
GLYM_HUMAN	Serine hydroxymethyltransferase, mitochondrial	7	7	8	8	16	6	11	28	22
K2C1B_HUMAN	Keratin, type II cytoskeletal 1b	18	11	7	8	6	6	7	14	4
NFS1_HUMAN	Cysteine desulfurase, mitochondrial	0	0	0	8	9	3	4	6	5
NPM_HUMAN	Nucleophosmin	8	5	2	8	12	2	11	18	10
PESC_HUMAN	Pescadillo homolog	5	0	1	8	11	7	9	19	23
PNO1_HUMAN	RNA-binding protein PNO1	0	0	0	8	9	2	24	19	24
RL8_HUMAN	60S ribosomal protein L8	0	0	0	8	10	3	6	12	10
ROA2_HUMAN	Heterogeneous nuclear ribonucleoproteins A2/B1	4	2	1	8	10	4	6	14	10
RS15_HUMAN	40S ribosomal protein S15	0	0	0	8	4	1	12	38	26
TRFL_HUMAN	Lactotransferrin	9	11	8	8	7	6	9	55	10
VIGLN_HUMAN	Vigilin	0	0	0	8	19	4	36	42	37
DSG1_HUMAN	Desmoglein-1	24	15	11	7	15	11	9	15	9
EIF1A_HUMAN	Probable RNA-binding protein EIF1AD	0	0	0	7	12	3	45	45	42
FUS_HUMAN	RNA-binding protein FUS	0	0	0	7	9	3	7	7	9
HAX1_HUMAN	HCLS1-associated protein X-1	2	2	0	7	5	5	6	7	10
LYRIC_HUMAN	Protein LYRIC	0	0	0	7	6	1	10	12	10
PABP4_HUMAN	Polyadenylate-binding protein 4	1	0	0	7	10	3	9	12	7
PRP6_HUMAN	Pre-mRNA-processing factor 6	0	0	0	7	11	2	14	27	24
RL6_HUMAN	60S ribosomal protein L6	4	4	1	7	5	4	5	13	10
CALL5_HUMAN	Calmodulin-like protein 5	10	7	6	6	4	4	8	5	2
DLDH_HUMAN	Dihydrolipoyl dehydrogenase, mitochondrial	4	4	1	6	13	3	5	14	5
FA98A_HUMAN	Protein FAM98A	0	0	0	6	8	1	9	16	12
K2C4_HUMAN	Keratin, type II cytoskeletal 4	2	2	0	6	0	1	0	10	1
PYM1_HUMAN	Partner of Y14 and mago	0	0	0	6	5	0	20	25	25
RL13_HUMAN	60S ribosomal protein L13	1	1	1	6	6	2	3	12	10
RL4_HUMAN	60S ribosomal protein L4	2	2	2	6	9	2	2	15	10
RS25_HUMAN	40S ribosomal protein S25	0	0	0	6	7	2	17	24	18
TERA_HUMAN	Transitional endoplasmic reticulum ATPase	16	9	6	6	12	2	5	13	13
EIF3E_HUMAN	Eukaryotic translation initiation factor 3 subunit E	0	0	0	5	5	2	1	12	11
EIF3H_HUMAN	Eukaryotic translation initiation factor 3 subunit H	0	0	0	5	5	1	2	7	8
GRP75_HUMAN	Stress-70 protein, mitochondrial	10	5	0	5	8	0	10	14	15
HNRH2_HUMAN	Heterogeneous nuclear ribonucleoprotein H2	0	0	0	5	11	4	5	9	6
PDCD4_HUMAN	Programmed cell death protein 4	0	0	0	5	7	0	2	12	8
RIOK3_HUMAN	Serine/threonine-protein kinase RIO3	0	0	0	5	7	2	4	8	5
RL7A_HUMAN	60S ribosomal protein L7a	3	0	3	5	8	2	6	10	8
TCPG_HUMAN	T-complex protein 1 subunit gamma	4	1	2	5	2	0	6	11	11
UBP16_HUMAN	Ubiquitin carboxyl-terminal hydrolase 16	0	0	0	5	5	0	21	20	26
VIME_HUMAN	Vimentin	3	3	1	5	8	1	6	19	4
ASCC3_HUMAN	Activating signal cointegrator 1 complex subunit 3	0	0	1	4	9	1	2	9	9
BOP1_HUMAN	Ribosome biogenesis protein BOP1	0	0	0	4	3	2	0	5	9
CLH1_HUMAN	Clathrin heavy chain 1	9	4	4	4	9	4	4	14	15
FUBP1_HUMAN	Far upstream element-binding protein 1	0	0	0	4	10	2	5	4	5
HNRH3_HUMAN	Heterogeneous nuclear ribonucleoprotein H3	5	6	5	4	12	4	6	9	6
HORN_HUMAN	Hornerin	52	10	27	4	10	12	6	13	9
K1C13_HUMAN	Keratin, type I cytoskeletal 13	4	3	0	4	0	2	0	9	0
K1C14_HUMAN	Keratin, type I cytoskeletal 14	23	16	10	4	11	6	7	13	5
MCMBP_HUMAN	Mini-chromosome maintenance complex-binding protein	3	1	1	4	6	5	3	10	9
PLAK_HUMAN	Junction plakoglobin	22	8	9	4	14	9	13	15	8
PRC2C_HUMAN	Protein PRRC2C	0	0	0	4	5	0	4	13	12
RL23A_HUMAN	60S ribosomal protein L23a	0	1	0	4	4	0	5	8	9
ATX2_HUMAN	Ataxin-2	0	0	0	3	2	0	6	11	13
EIF3B_HUMAN	Eukaryotic translation initiation factor 3 subunit B	1	0	0	3	8	2	1	11	5
G3P_HUMAN	Glyceraldehyde-3-phosphate dehydrogenase	8	8	3	3	4	4	3	17	7
HNRPQ_HUMAN	Heterogeneous nuclear ribonucleoprotein Q	0	0	0	3	3	1	4	7	7
K2C78_HUMAN	Keratin, type II cytoskeletal 78	16	0	2	3	3	3	6	5	3
PIGR_HUMAN	Polymeric immunoglobulin receptor	3	3	3	3	2	1	1	12	2
SYEP_HUMAN	Bifunctional glutamate/proline--tRNA ligase	3	0	0	3	5	0	3	9	9
TCPB_HUMAN	T-complex protein 1 subunit beta	7	6	3	3	2	2	10	14	15
ZA2G_HUMAN	Zinc-alpha-2-glycoprotein	7	5	2	3	5	5	5	8	5
ACTN1_HUMAN	Alpha-actinin-1	3	1	0	2	0	1	1	11	9
ARGI1_HUMAN	Arginase-1	10	4	6	2	2	1	3	1	2
EF2_HUMAN	Elongation factor 2	3	1	1	2	2	2	2	14	5
K1C16_HUMAN	Keratin, type I cytoskeletal 16	14	9	10	2	18	5	9	10	4
RL19_HUMAN	60S ribosomal protein L19	1	0	0	2	1	0	2	7	10
RL9_HUMAN	60S ribosomal protein L9	1	0	0	2	2	0	5	9	6
TCPA_HUMAN	T-complex protein 1 subunit alpha	9	2	1	2	3	2	4	13	6
TCPZ_HUMAN	T-complex protein 1 subunit zeta	4	3	1	2	3	1	4	9	7
TGM3_HUMAN	Protein-glutamine gamma-glutamyltransferase E	11	1	4	2	3	2	4	4	3
XRN2_HUMAN	5'-3' exoribonuclease 2	0	0	0	2	6	1	1	7	2
CKAP4_HUMAN	Cytoskeleton-associated protein 4	0	0	0	1	1	0	3	9	6
FILA_HUMAN	Filaggrin	18	1	1	1	3	0	0	2	0
FILA2_HUMAN	Filaggrin-2	9	0	1	1	5	3	2	5	3
HUWE1_HUMAN	E3 ubiquitin-protein ligase HUWE1	13	4	5	1	0	0	0	6	3
PHB_HUMAN	Prohibitin	3	0	0	1	4	0	3	6	8
PYR1_HUMAN	CAD protein	13	4	2	1	1	0	0	5	6
RS27A_HUMAN	Ubiquitin-40S ribosomal protein S27a	0	0	0	1	2	2	2	10	10
TGM1_HUMAN	Protein-glutamine gamma-glutamyltransferase K	9	3	2	1	2	0	1	3	2
BMS1_HUMAN	Ribosome biogenesis protein BMS1 homolog	0	0	0	0	0	1	0	5	10
FAS_HUMAN	Fatty acid synthase	0	0	0	0	1	0	2	11	9
FBX31_HUMAN	F-box only protein 31	13	8	9	0	0	0	0	0	0
G3BP1_HUMAN	Ras GTPase-activating protein-binding protein 1	0	0	0	0	3	0	7	10	10
IRS4_HUMAN	Insulin receptor substrate 4	5	0	0	0	2	0	4	7	14
K1C17_HUMAN	Keratin, type I cytoskeletal 17	8	1	1	0	3	0	1	6	9
K1C19_HUMAN	Keratin, type I cytoskeletal 19	0	0	0	0	0	1	0	10	0
KPYM_HUMAN	Pyruvate kinase PKM	41	27	17	0	1	0	0	18	4
MYH9_HUMAN	Myosin-9	1	1	0	0	1	1	0	16	5
OTU6B_HUMAN	OTU domain-containing protein 6B	0	0	0	0	0	0	16	12	17
PERM_HUMAN	Myeloperoxidase	0	1	0	0	0	1	0	17	0
TCPD_HUMAN	T-complex protein 1 subunit delta	6	2	1	0	1	0	4	14	10
TCPQ_HUMAN	T-complex protein 1 subunit theta	5	2	3	0	3	1	4	10	9
U520_HUMAN	U5 small nuclear ribonucleoprotein 200 kDa helicase	0	0	0	0	0	0	3	9	9
1The table includes proteins for which more than 10 peptides were identified.

## Sheet: Identified proteins (norm.)
Table S2-2. Spectral counts of proteins identified on RIOK1(WT)- and RIOK1(kd)-StHA after normalization
					1Spectral counts of proteins identified on RIOK1-StHA				1Spectral counts of proteins identified on RIOK1(kd)-StHA
UniProt Identifier	UniProt Name	Gene Name	Description	Protein length in amino acids	RIOK1-StHA_I	RIOK1-StHA_II	RIOK1-StHA_III	RIOK1-StHA Average	RIOK1(kd)-StHA_I	RIOK1(kd)-StHA_II	RIOK1(kd)-StHA_III	RIOK1(kd)-StHA Average
Q9BRS2	RIOK1_HUMAN	RIOK1	Serine/threonine-protein kinase RIO1	568	779.93	779.93	779.93	779.93	779.93	779.93	779.93	779.93
P39019	RS19_HUMAN	RPS19	40S ribosomal protein S19	145	321.052	317.241	269.146	302.48	477.13	435.399	605.69	506.073
P63220	RS21_HUMAN	RPS21	40S ribosomal protein S21	83	235.205	240.964	254.159	243.443	457.103	412.549	637.992	502.548
P61247	RS3A_HUMAN	RPS3A	40S ribosomal protein S3a	264	142.206	204.545	203.761	183.504	376.183	368.842	371.808	372.278
Q9BQA1	MEP50_HUMAN	MEP50	Methylosome protein 50	342	311.755	333.333	317.662	320.917	407.847	362.94	332.327	367.705
P08708	RS17_HUMAN	RPS17	40S ribosomal protein S17	135	77.8657	162.963	164.074	134.968	363.691	372.535	363.546	366.591
O14744	ANM5_HUMAN	PRMT5	Protein arginine N-methyltransferase 5	637	268.749	293.564	284.802	282.372	399.401	398.118	293.994	363.838
P62081	RS7_HUMAN	RPS7	40S ribosomal protein S7	194	116.11	164.948	163.108	148.055	345.114	325.427	379.475	350.005
P62847	RS24_HUMAN	RPS24	40S ribosomal protein S24	133	79.0366	120.301	166.541	121.96	343.99	370.092	310.748	341.61
P62277	RS13_HUMAN	RPS13	40S ribosomal protein S13	151	69.615	119.205	167.644	118.822	317.764	311.802	359.238	329.601
P62857	RS28_HUMAN	RPS28	40S ribosomal protein S28	69	239.401	231.884	168.15	213.145	307.268	341.175	336.925	328.456
P23396	RS3_HUMAN	RPS3	40S ribosomal protein S3	243	92.6972	152.263	117.196	120.719	293.891	312.648	340.16	315.566
Q8N9N8	EIF1A_HUMAN	EIF1AD	Probable RNA-binding protein EIF1AD	165	27.3035	72.7273	44.7475	48.2594	284.039	291.831	352.24	309.37
P62269	RS18_HUMAN	RPS18	40S ribosomal protein S18	152	49.3979	144.737	124.906	106.347	249.602	295.671	203.928	249.734
P62249	RS16_HUMAN	RPS16	40S ribosomal protein S16	146	174.855	164.384	173.386	170.875	236.931	219.873	291.925	249.576
P62280	RS11_HUMAN	RPS11	40S ribosomal protein S11	158	95.044	145.57	120.163	120.259	240.124	237.036	269.753	248.971
P60866	RS20_HUMAN	RPS20	40S ribosomal protein S20	119	63.0964	67.2269	79.7719	70.0317	225.049	233.792	249.626	236.156
P62244	RS15A_HUMAN	RPS15A	40S ribosomal protein S15a	130	69.309	146.154	121.703	112.389	240.341	222.241	218.569	227.05
P62263	RS14_HUMAN	RPS14	40S ribosomal protein S14	151	129.285	112.583	139.704	127.19	214.306	191.333	239.492	215.044
P67870	CSK2B_HUMAN	CSNK2B	Casein kinase II subunit beta	215	146.677	213.953	230.576	197.069	207.604	199.079	198.237	201.64
P62266	RS23_HUMAN	RPS23	40S ribosomal protein S23	143	84.0109	111.888	118.015	104.638	195.082	209.52	189.667	198.09
P46783	RS10_HUMAN	RPS10	40S ribosomal protein S10	165	63.7083	96.9697	95.8874	85.5218	155.545	207.525	226.999	196.69
P62841	RS15_HUMAN	RPS15	40S ribosomal protein S15	145	10.3565	27.5862	58.1938	32.0455	200.087	280.426	106.886	195.8
P15880	RS2_HUMAN	RPS2	40S ribosomal protein S2	293	71.7533	88.7372	82.797	81.0959	175.188	186.254	193.952	185.131
P62753	RS6_HUMAN	RPS6	40S ribosomal protein S6	249	84.4326	80.3213	84.7198	83.1579	183.737	232.059	129.673	181.823
P62851	RS25_HUMAN	RPS25	40S ribosomal protein S25	125	24.0271	56	50.6286	43.5519	160.685	205.449	175.65	180.595
Q8N1G4	LRC47_HUMAN	LRRC47	Leucine-rich repeat-containing protein 47	583	33.4855	60.0343	54.2759	49.2652	168.433	187.213	186.089	180.578
P46781	RS9_HUMAN	RPS9	40S ribosomal protein S9	194	38.7035	87.6289	59.8061	62.0461	195.565	198.566	139.806	177.979
P46782	RS5_HUMAN	RPS5	40S ribosomal protein S5	204	73.6125	112.745	87.8968	91.4181	153.158	188.832	189.933	177.308
Q8NC51	PAIRB_HUMAN	SERBP1	Plasminogen activator inhibitor 1 RNA-binding protein	408	66.2512	75.9804	67.2152	69.8156	164.098	178.341	167.774	170.071
P19338	NUCL_HUMAN	NCL	Nucleolin	710	50.7615	64.7887	65.3655	60.3053	161.88	155.232	169.174	162.095
P62318	SMD3_HUMAN	SNRPD3	Small nuclear ribonucleoprotein Sm D3	126	131.1	119.048	125.567	125.238	185.978	144.372	153.755	161.368
P62241	RS8_HUMAN	RPS8	40S ribosomal protein S8	208	86.6362	86.5385	91.2775	88.1507	155.578	180.056	136.606	157.413
P62701	RS4X_HUMAN	RPS4X	40S ribosomal protein S4, X isoform	263	57.0987	60.8365	60.1575	59.3642	152.743	130.196	171.879	151.606
P19784	CSK22_HUMAN	CSNK2A2	Casein kinase II subunit alpha'	350	154.46	154.286	135.612	148.119	140.281	152.864	132.845	141.996
Q9ULX3	NOB1_HUMAN	NOB1	RNA-binding protein NOB1	412	40.0938	70.3883	66.5626	59.0149	140.838	129.86	150.471	140.39
P08865	RSSA_HUMAN	RPSA	40S ribosomal protein SA	295	66.1764	64.4068	67.9338	66.1723	132.391	137.837	135.722	135.317
Q9BRP8	PYM1_HUMAN	PYM1	Partner of Y14 and mago	204	0	24.5098	31.0224	18.5107	136.749	131.133	126.622	131.501
P54105	ICLN_HUMAN	CLNS1A	Methylosome subunit pICln	237	107.717	97.0464	93.4599	99.4076	112.999	135.449	114.441	120.963
P22061	PIMT_HUMAN	PCMT1	Protein-L-isoaspartate(D-aspartate) O-methyltransferase	227	105.846	105.727	111.517	107.697	117.977	108.419	125.172	117.189
Q14011	CIRBP_HUMAN	CIRBP	Cold-inducible RNA-binding protein	172	148.423	87.2093	98.1174	111.25	110.289	118.203	97.6168	108.703
Q9NRX1	PNO1_HUMAN	PNO1	RNA-binding protein PNO1	252	11.9182	35.7143	33.4845	27.039	106.273	80.6782	123.004	103.319
P63244	RACK1_HUMAN	RACK1	Receptor of activated protein C kinase 1	317	37.8977	47.3186	36.6006	40.6056	105.603	118.144	85.5598	103.102
Q9Y3I0	RTCB_HUMAN	RTCB	tRNA-splicing ligase RtcB homolog	505	56.4994	79.2079	71.0137	68.907	110.482	86.8752	107.416	101.591
Q9Y224	RTRAF_HUMAN	RTRAF	RNA transcription, translation and transport factor protein	244	61.5449	77.8689	64.8419	68.0852	114.331	109.636	79.3983	101.122
P31943	HNRH1_HUMAN	HNRNPH1	Heterogeneous nuclear ribonucleoprotein H	449	76.9242	95.7684	93.9654	88.886	84.4979	95.3272	109.307	96.3773
Q92499	DDX1_HUMAN	DDX1	ATP-dependent RNA helicase DDX1	740	34.4984	58.1081	38.4846	43.697	93.4917	104.113	76.7946	91.4664
Q2NL82	TSR1_HUMAN	TSR1	Pre-rRNA-processing protein TSR1 homolog	804	22.4134	36.0697	23.6141	27.3657	83.2738	75.8616	65.8624	74.9993
Q8ND56	LS14A_HUMAN	LSM14A	Protein LSM14 homolog A	463	48.651	43.1965	56.9526	49.6001	69.8924	69.3336	83.6854	74.3038
O14874	BCKD_HUMAN	BCKDK	[3-methyl-2-oxobutanoate dehydrogenase [lipoamide]] kinase, mitochondrial	412	36.4489	48.5437	43.5217	42.8381	81.2526	59.7357	56.4267	65.805
P78347	GTF2I_HUMAN	GTF2I	General transcription factor II-I	998	51.1599	67.1343	57.0713	58.4552	70.4406	65.4038	59.5301	65.1248
Q86V81	THOC4_HUMAN	ALYREF	THO complex subunit 4	257	46.7454	46.6926	45.1455	46.1945	73.8123	62.4542	55.2801	63.8489
Q8N6M0	OTU6B_HUMAN	OTUD6B	OTU domain-containing protein 6B	293	0	0	0	0	64.7433	43.8245	70.5281	59.6986
Q13347	EIF3I_HUMAN	EIF3I	Eukaryotic translation initiation factor 3 subunit I	325	32.3442	55.3846	64.9084	50.8791	68.6689	49.3868	55.6358	57.8972
P62750	RL23A_HUMAN	RPL23A	60S ribosomal protein L23a	156	0	25.641	27.0452	17.5621	64.3771	54.8743	41.3957	53.549
P62979	RS27A_HUMAN	RPS27A	Ubiquitin-40S ribosomal protein S27a	156	19.2525	12.8205	6.76129	12.9448	71.5301	68.5928	16.5583	52.2271
O95785	WIZ_HUMAN	WIZ	Protein Wiz	1651	37.2922	47.2441	47.9147	44.1503	50.0147	53.7941	48.5014	50.7701
P26373	RL13_HUMAN	RPL13	60S ribosomal protein L13	211	14.2341	28.436	29.9932	24.2211	52.8848	60.8558	18.3632	44.0346
Q7Z417	NUFP2_HUMAN	NUFIP2	Nuclear fragile X mental retardation-interacting protein 2	695	19.4464	33.0935	27.3176	26.6192	41.7447	49.2684	35.3084	42.1072
P62917	RL8_HUMAN	RPL8	60S ribosomal protein L8	257	17.5295	38.9105	32.8331	29.7577	43.419	49.9633	30.1528	41.1784
Q7KZF4	SND1_HUMAN	SND1	Staphylococcal nuclease domain-containing protein 1	910	14.8519	19.7802	18.5453	17.7258	40.4656	43.5075	36.9013	40.2914
P09651	ROA1_HUMAN	HNRNPA1	Heterogeneous nuclear ribonucleoprotein A1	372	40.3681	40.3226	28.3538	36.3482	41.9951	31.6412	45.1346	39.5903
P32969	RL9_HUMAN	RPL9	60S ribosomal protein L9	192	0	10.4167	10.9871	7.13459	34.8709	50.1585	33.634	39.5545
Q01844	EWS_HUMAN	EWSR1	RNA-binding protein EWS	656	20.6025	33.5366	32.1574	28.7655	39.1235	35.8858	43.314	39.4411
Q9H078	CLPB_HUMAN	CLPB	Caseinolytic peptidase B protein homolog	707	16.9923	32.5318	20.8864	23.4702	37.8796	42.3782	36.5359	38.9312
P84098	RL19_HUMAN	RPL19	60S ribosomal protein L19	196	0	5.10204	10.7629	5.28831	56.9321	38.216	13.179	36.109
Q00341	VIGLN_HUMAN	VGL	Vigilin	1268	4.73721	14.9842	6.65465	8.79203	32.5608	35.4432	36.6685	34.8909
Q6PKG0	LARP1_HUMAN	LARP1	La-related protein 1	1096	10.9613	18.2482	13.4732	14.2276	36.6526	39.0529	28.282	34.6625
P62424	RL7A_HUMAN	RPL7A	60S ribosomal protein L7a	266	11.2909	30.0752	19.8264	20.3975	33.56	40.2274	29.1326	34.3066
Q15233	NONO_HUMAN	NONO	Non-POU domain-containing octamer-binding protein	471	44.6364	40.3397	33.5911	39.5224	35.5372	31.8061	32.9056	33.4163
O00541	PESC_HUMAN	PES1	Pescadillo homolog	588	17.8773	18.7075	14.3505	16.9784	43.6479	34.5764	19.7685	32.6643
P22626	ROA2_HUMAN	HNRNPA2B1	Heterogeneous nuclear ribonucleoproteins A2/B1	353	17.0164	28.3286	23.904	23.083	31.611	42.4382	21.9526	32.0006
Q00839	HNRPU_HUMAN	HNRNPU	Heterogeneous nuclear ribonucleoprotein U	825	18.2024	37.5758	25.57	27.116	29.7565	41.5049	23.4826	31.5814
O00165	HAX1_HUMAN	HAX1	HCLS1-associated protein X-1	279	26.9121	17.9211	26.4636	23.7656	39.9953	26.8471	27.7752	31.5392
Q9Y5T5	UBP16_HUMAN	USP16	Ubiquitin carboxyl-terminal hydrolase 16	823	0	6.07533	6.40803	4.16112	35.2522	26.0036	32.9556	31.4038
Q9Y2J2	E41L3_HUMAN	EPB41L3	Band 4.1-like protein 3	1087	20.7226	23.919	30.0806	24.9074	26.6905	38.3918	23.7635	29.6153
Q52LJ0	FA98B_HUMAN	FAM98B	Protein FAM98B	433	10.4044	23.0947	21.9235	18.4742	33.5018	34.5974	17.8967	28.6653
Q14152	EIF3A_HUMAN	EIF3A	Eukaryotic translation initiation factor 3 subunit A	1382	9.77949	28.22	23.6596	20.553	35.5269	36.3909	13.0837	28.3338
Q13263	TIF1B_HUMAN	TIF1B	Transcription intermediary factor 1-beta	835	14.3875	27.5449	22.7374	21.5566	26.7274	30.7559	24.7482	27.4105
Q8NCA5	FA98A_HUMAN	FAM98A	Protein FAM98A	518	2.89902	15.444	12.2173	10.1868	25.8502	33.0517	22.44	27.114
P22087	FBRL_HUMAN	FBL	rRNA 2'-O-methyltransferase fibrillarin	321	28.0691	34.2679	26.2869	29.5413	27.8098	20.0009	32.188	26.6663
O15371	EIF3D_HUMAN	EIF3D	Eukaryotic translation initiation factor 3 subunit D	548	10.9613	18.2482	19.2475	16.1523	34.6164	27.337	16.4978	26.1504
O94906	PRP6_HUMAN	PRPF6	Pre-mRNA-processing factor 6	941	3.1917	11.6897	7.84626	7.57588	28.46	30.7028	19.2153	26.126
P52272	HNRPM_HUMAN	HNRNPM	Heterogeneous nuclear ribonucleoprotein M	730	6.17135	26.0274	20.2283	17.4757	27.5146	24.9189	24.7694	25.7343
O00267	SPT5H_HUMAN	SUPT5H	Transcription elongation factor SPT5	1087	13.815	20.2392	17.4662	17.1735	25.664	25.5945	20.199	23.8192
P35232	PHB_HUMAN	PHB	Prohibitin	272	0	14.7059	3.8778	6.19456	32.8197	23.604	14.245	23.5562
P23246	SFPQ_HUMAN	SFPQ	Splicing factor, proline- and glutamine-rich	707	27.6125	39.604	23.8701	30.3622	26.8314	16.6486	23.7484	22.4094
Q13283	G3BP1_HUMAN	G3BP1	Ras GTPase-activating protein-binding protein 1	466	0	6.43777	0	2.14592	23.9457	22.9624	19.4009	22.103
Q86UE4	LYRIC_HUMAN	LYRIC	Protein LYRIC	582	2.58023	10.3093	12.6861	8.52522	19.173	22.0629	22.1915	21.1425
Q9C0C9	UBE2O_HUMAN	UBE2O	(E3-independent) E2 ubiquitin-conjugating enzyme	1292	17.4345	23.9938	16.3276	19.252	24.1829	16.5642	19.993	20.2467
P60228	EIF3E_HUMAN	EIF3E	Eukaryotic translation initiation factor 3 subunit E	445	6.74919	11.236	11.8513	9.94547	27.5833	28.8552	2.90235	19.7803
P49368	TCPG_HUMAN	TRIC5	T-complex protein 1 subunit gamma	545	0	3.66972	9.67671	4.44881	22.5221	21.5973	14.2188	19.4461
Q08211	DHX9_HUMAN	DHX9	ATP-dependent RNA helicase A	1270	15.3717	18.1102	12.4578	15.3132	16.6941	21.9065	18.3054	18.9687
O15372	EIF3H_HUMAN	EIF3H	Eukaryotic translation initiation factor 3 subunit H	352	4.26618	14.2045	14.9824	11.151	25.3607	21.2794	7.33832	17.9928
P17844	DDX5_HUMAN	DDX5	Probable ATP-dependent RNA helicase DDX5	614	12.2288	11.4007	13.7428	12.4574	19.9911	15.6847	16.828	17.5013
Q53EL6	PDCD4_HUMAN	PDCD4	Programmed cell death protein 4	469	0	14.9254	11.2448	8.72339	19.034	27.3786	5.50766	17.3068
P55795	HNRH2_HUMAN	HNRNPH2	Heterogeneous nuclear ribonucleoprotein H2	449	13.3781	24.4989	11.7457	16.5409	14.9114	21.4486	14.3825	16.9142
P35637	FUS_HUMAN	FUS	RNA-binding protein FUS	526	8.5648	17.1103	14.0368	13.2373	19.0928	14.2402	17.1879	16.8403
Q13310	PABP4_HUMAN	PABPC4	Polyadenylate-binding protein 4	644	6.99547	15.528	11.4648	11.3294	12.129	19.9388	18.0495	16.7058
P24666	PPAC_HUMAN	ACP1	Low molecular weight phosphotyrosine protein phosphatase	158	104.548	88.6076	113.487	102.214	14.1249	13.5449	16.3487	14.6728
Q9Y697	NFS1_HUMAN	NFS1	Cysteine desulfurase, mitochondrial	457	9.85795	19.6937	18.4641	16.0052	12.2086	14.0488	11.3046	12.5207
O14730	RIOK3_HUMAN	RIOK3	Serine/threonine-protein kinase RIO3	519	5.78688	13.4875	10.1615	9.81195	10.7502	16.494	9.95411	12.3994
Q92945	FUBP2_HUMAN	FUBP2	Far upstream element-binding protein 2	711	14.7846	14.0647	13.3514	14.0669	10.9861	7.52495	16.3487	11.6199
Q07065	CKAP4_HUMAN	CKAP4	Cytoskeleton-associated protein 4	602	0	1.66113	1.7521	1.13774	11.1216	15.9974	6.43627	11.1851
O60506	HNRPQ_HUMAN	SYNCRIP	Heterogeneous nuclear ribonucleoprotein Q	623	2.41043	4.81541	5.07911	4.10165	12.5379	12.023	8.29242	10.9511
Q99700	ATX2_HUMAN	ATXN2	Ataxin-2	1313	0	1.52323	2.40997	1.31107	11.0482	8.96461	5.90196	8.63826
Q96AE4	FUBP1_HUMAN	FUBP1	Far upstream element-binding protein 1	644	4.66365	15.528	6.55132	8.91431	8.66358	6.64626	10.0275	8.44579
P55884	EIF3B_HUMAN	EIF3B	Eukaryotic translation initiation factor 3 subunit B	814	3.68967	9.82801	3.88733	5.80167	6.85423	14.4601	1.58666	7.63367
O14654	IRS4_HUMAN	IRS4	Insulin receptor substrate 4	1257	0	1.59109	0	0.530363	12.4281	5.9589	4.10993	7.49899
Q14137	BOP1_HUMAN	BOP1	Ribosome biogenesis protein BOP1	746	4.02599	4.02145	5.65556	4.56767	13.4622	7.17191	0	6.87804
P07814	SYEP_HUMAN	EPRS	Bifunctional glutamate/proline--tRNA ligase	1512	0	3.30688	2.09278	1.79989	6.64208	6.36934	2.56259	5.19133
Q9Y520	PRC2C_HUMAN	PRRC2C	Protein PRRC2C	2896	0	1.72652	1.45685	1.06112	4.62377	4.80339	1.7839	3.73702
O75643	U520_HUMAN	SNRNP200	U5 small nuclear ribonucleoprotein 200 kDa helicase	2136	0	0	0	0	4.7017	4.50863	1.81397	3.67476
Q8N3C0	ASCC3_HUMAN	ASCC3	Activating signal cointegrator 1 complex subunit 3	2202	0.681969	4.08719	1.91601	2.22839	4.56077	4.37349	1.17307	3.36911
P49327	FAS_HUMAN	FASN	Fatty acid synthase	2511	0	0.398248	0	0.132749	3.99953	4.68759	1.02871	3.23861
1Spectral counts normalized to protein length (spectral counts per 1000 amino acids) and normalized to spectral counts of the bait (RIOK1) identified in RIOK1-StHA_II after filtering against the HASt-GFP control

## Sheet: RIOK1 kd vs. WT
Table S2-3. Comparison of spectral counts of proteins identified on RIOK1(WT)- and RIOK1(kd)-StHA
				1Spectral counts of proteins identified on RIOK1-StHA			1Spectral counts of proteins identified on RIOK1(kd)-StHA
UniProt Identifier	UniProt Name	Gene Name	Description	RIOK1-StHA_I	RIOK1-StHA_II	RIOK1-StHA_III	RIOK1(kd)-StHA_I	RIOK1(kd)-StHA_II	RIOK1(kd)-StHA_III	p.value	adj.p.value	log2FC (kd vs. WT)	Category (for significant hits)
P08865	RSSA_HUMAN	RPSA	40S ribosomal protein SA	19.522	19	20.0405	39.0554	40.6618	40.0379	3.28965e-06	0.000388179	1.03204	Ribosomal protein
P60866	RS20_HUMAN	RPS20	40S ribosomal protein S20	7.50847	8	9.49286	26.7809	27.8213	29.7055	4.57028e-05	0.00179765	1.75366	Ribosomal protein
Q8NC51	PAIRB_HUMAN	SERBP1	Plasminogen activator inhibitor 1 RNA-binding protein	27.0305	31	27.4238	66.9521	72.7633	68.4519	4.50744e-05	0.00179765	1.28452	mRNA/ribosome-associated
P19338	NUCL_HUMAN	NCL	Nucleolin	36.0407	46	46.4095	114.935	110.215	120.114	8.29498e-05	0.00244702	1.42649
P15880	RS2_HUMAN	RPS2	40S ribosomal protein S2	21.0237	26	24.2595	51.33	54.5725	56.828	0.000146724	0.0034627	1.19085	Ribosomal protein
Q8N1G4	LRC47_HUMAN	LRRC47	Leucine-rich repeat-containing protein 47	19.522	35	31.6429	98.1965	109.145	108.49	0.000201902	0.00397073	1.87398
P24666	PPAC_HUMAN	ACP1	Low molecular weight phosphotyrosine protein phosphatase	16.5186	14	17.931	2.23174	2.1401	2.58309	0.000281072	0.00473807	-2.80038
Q9BRP8	PYM1_HUMAN	PYM1	Partner of Y14 and mago	0	5	6.32857	27.8967	26.7512	25.8309	0.000334649	0.00493608	2.82864	mRNA/ribosome-associated
Q8N9N8	EIF1A_HUMAN	EIF1AD	Probable RNA-binding protein EIF1AD	4.50508	12	7.38333	46.8665	48.1522	58.1195	0.000496476	0.00650935	2.68045
P23396	RS3_HUMAN	RPS3	40S ribosomal protein S3	22.5254	37	28.4786	71.4156	75.9734	82.6589	0.000880855	0.00799545	1.38629	Ribosomal protein
P62081	RS7_HUMAN	RPS7	40S ribosomal protein S7	22.5254	32	31.6429	66.9521	63.1329	73.6181	0.000848056	0.00799545	1.24124	Ribosomal protein
Q7KZF4	SND1_HUMAN	SND1	Staphylococcal nuclease domain-containing protein 1	13.5153	18	16.8762	36.8237	39.5918	33.5802	0.000731396	0.00799545	1.18462
P61247	RS3A_HUMAN	RPS3A	40S ribosomal protein S3a	37.5424	54	53.7929	99.3123	97.3744	98.1574	0.000811091	0.00799545	1.02057	Ribosomal protein
Q13283	G3BP1_HUMAN	G3BP1	Ras GTPase-activating protein-binding protein 1	0	3	0	11.1587	10.7005	9.04082	0.00144257	0.00932821	3.36457	mRNA/ribosome-associated
Q9Y5T5	UBP16_HUMAN	USP16	Ubiquitin carboxyl-terminal hydrolase 16	0	5	5.27381	29.0126	21.401	27.1224	0.00142809	0.00932821	2.9159	mRNA/ribosome-associated
P62851	RS25_HUMAN	RPS25	40S ribosomal protein S25	3.00339	7	6.32857	20.0856	25.6812	21.9563	0.00113608	0.00932821	2.05195	Ribosomal protein
Q00341	VIGLN_HUMAN	VGL	Vigilin	6.00678	19	8.4381	41.2872	44.942	46.4956	0.001502	0.00932821	1.98858
P08708	RS17_HUMAN	RPS17	40S ribosomal protein S17	10.5119	22	22.15	49.0982	50.2923	49.0787	0.00128164	0.00932821	1.44156	Ribosomal protein
P62266	RS23_HUMAN	RPS23	40S ribosomal protein S23	12.0136	16	16.8762	27.8967	29.9614	27.1224	0.00147803	0.00932821	0.920746
P62701	RS4X_HUMAN	RPS4X	40S ribosomal protein S4, X isoform	15.0169	16	15.8214	40.1713	34.2415	45.2041	0.00159023	0.00938237	1.35266	Ribosomal protein
Q8N6M0	OTU6B_HUMAN	OTUD6B	OTU domain-containing protein 6B	0	0	0	18.9698	12.8406	20.6647	0.00181516	0.00960663	7.45053	mRNA/ribosome-associated
P62847	RS24_HUMAN	RPS24	40S ribosomal protein S24	10.5119	16	22.15	45.7506	49.2222	41.3294	0.00198409	0.00960663	1.48595	Ribosomal protein
Q2NL82	TSR1_HUMAN	TSR1	Pre-rRNA-processing protein TSR1 homolog	18.0203	29	18.9857	66.9521	60.9928	52.9534	0.0020353	0.00960663	1.45451	40S assembly factor
Q9ULX3	NOB1_HUMAN	NOB1	RNA-binding protein NOB1	16.5186	29	27.4238	58.0252	53.5024	61.9942	0.00192699	0.00960663	1.25029	40S assembly factor
P62280	RS11_HUMAN	RPS11	40S ribosomal protein S11	15.0169	23	18.9857	37.9395	37.4517	42.621	0.00199461	0.00960663	1.04984	Ribosomal protein
P62277	RS13_HUMAN	RPS13	40S ribosomal protein S13	10.5119	18	25.3143	47.9824	47.0821	54.2449	0.00274792	0.0124713	1.47193	Ribosomal protein
P63244	RACK1_HUMAN	RACK1	Receptor of activated protein C kinase 1	12.0136	15	11.6024	33.4761	37.4517	27.1224	0.00343176	0.0149981	1.34432	Ribosomal protein
P62241	RS8_HUMAN	RPS8	40S ribosomal protein S8	18.0203	18	18.9857	32.3602	37.4517	28.414	0.00545157	0.0221823	0.836513
P62263	RS14_HUMAN	RPS14	40S ribosomal protein S14	19.522	17	21.0952	32.3602	28.8913	36.1633	0.00535274	0.0221823	0.757639
Q9NRX1	PNO1_HUMAN	PNO1	RNA-binding protein PNO1	3.00339	9	8.4381	26.7809	20.3309	30.9971	0.00618787	0.0241807	1.93399	40S assembly factor
Q6PKG0	LARP1_HUMAN	LARP1	La-related protein 1	12.0136	20	14.7667	40.1713	42.8019	30.9971	0.00635255	0.0241807	1.28469	mRNA/ribosome-associated
P46782	RS5_HUMAN	RPS5	40S ribosomal protein S5	15.0169	23	17.931	31.2443	38.5217	38.7464	0.00667851	0.024627	0.955704
P32969	RL9_HUMAN	RPL9	60S ribosomal protein L9	0	2	2.10952	6.69521	9.63043	6.45773	0.00716219	0.0256103	2.47094	Ribosomal protein
P46781	RS9_HUMAN	RPS9	40S ribosomal protein S9	7.50847	17	11.6024	37.9395	38.5217	27.1224	0.0081958	0.0281285	1.52029	Ribosomal protein
P62244	RS15A_HUMAN	RPS15A	40S ribosomal protein S15a	9.01017	19	15.8214	31.2443	28.8913	28.414	0.00834321	0.0281285	1.01452	Ribosomal protein
P46783	RS10_HUMAN	RPS10	40S ribosomal protein S10	10.5119	16	15.8214	25.665	34.2415	37.4548	0.00972981	0.0316546	1.20156	Ribosomal protein
P62857	RS28_HUMAN	RPS28	40S ribosomal protein S28	16.5186	16	11.6024	21.2015	23.5411	23.2478	0.00992561	0.0316546	0.623864
Q99700	ATX2_HUMAN	ATXN2	Ataxin-2	0	2	3.16429	14.5063	11.7705	7.74927	0.0113731	0.0346526	2.72
Q92499	DDX1_HUMAN	DDX1	ATP-dependent RNA helicase DDX1	25.5288	43	28.4786	69.1839	77.0435	56.828	0.011453	0.0346526	1.06571
O94906	PRP6_HUMAN	PRPF6	Pre-mRNA-processing factor 6	3.00339	11	7.38333	26.7809	28.8913	18.0816	0.0123972	0.0357321	1.786	mRNA/ribosome-associated
O60506	HNRPQ_HUMAN	SYNCRIP	Heterogeneous nuclear ribonucleoprotein Q	1.50169	3	3.16429	7.81108	7.49034	5.16618	0.0124154	0.0357321	1.4168	mRNA/ribosome-associated
Q8ND56	LS14A_HUMAN	LSM14A	Protein LSM14 homolog A	22.5254	20	26.369	32.3602	32.1014	38.7464	0.0160469	0.0450841	0.583095
O75643	U520_HUMAN	SNRNP200	U5 small nuclear ribonucleoprotein 200 kDa helicase	0	0	0	10.0428	9.63043	3.87464	0.0169228	0.0456487	6.29449	mRNA/ribosome-associated
Q86UE4	LYRIC_HUMAN	LYRIC	Protein LYRIC	1.50169	6	7.38333	11.1587	12.8406	12.9155	0.0170216	0.0456487	1.31033
P49368	TCPG_HUMAN	TRIC5	T-complex protein 1 subunit gamma	0	2	5.27381	12.2746	11.7705	7.74927	0.0176781	0.0463559	2.12799
P39019	RS19_HUMAN	RPS19	40S ribosomal protein S19	46.5525	46	39.0262	69.1839	63.1329	87.8251	0.01948	0.0499703	0.742507
P63220	RS21_HUMAN	RPS21	40S ribosomal protein S21	19.522	20	21.0952	37.9395	34.2415	52.9534	0.020009	0.0502354	1.04568
P62269	RS18_HUMAN	RPS18	40S ribosomal protein S18	7.50847	22	18.9857	37.9395	44.942	30.9971	0.0218108	0.0536183	1.23161
Q07065	CKAP4_HUMAN	CKAP4	Cytoskeleton-associated protein 4	0	1	1.05476	6.69521	9.63043	3.87464	0.0234818	0.055417	3.29733
P62249	RS16_HUMAN	RPS16	40S ribosomal protein S16	25.5288	24	25.3143	34.5919	32.1014	42.621	0.0231697	0.055417	0.546542
Q8NCA5	FA98A_HUMAN	FAM98A	Protein FAM98A	1.50169	8	6.32857	13.3904	17.1208	11.6239	0.0258087	0.0587564	1.41234
P17844	DDX5_HUMAN	DDX5	Probable ATP-dependent RNA helicase DDX5	7.50847	7	8.4381	12.2746	9.63043	10.3324	0.0258927	0.0587564	0.490455
P62753	RS6_HUMAN	RPS6	40S ribosomal protein S6	21.0237	20	21.0952	45.7506	57.7826	32.2886	0.0290342	0.0646422	1.12861
P62750	RL23A_HUMAN	RPL23A	60S ribosomal protein L23a	0	4	4.21905	10.0428	8.56039	6.45773	0.0310274	0.0656793	1.6084
Q9Y3I0	RTCB_HUMAN	RTCB	tRNA-splicing ligase RtcB homolog	28.5322	40	35.8619	55.7935	43.872	54.2449	0.0303638	0.0656793	0.56005
Q86V81	THOC4_HUMAN	ALYREF	THO complex subunit 4	12.0136	12	11.6024	18.9698	16.0507	14.207	0.0311698	0.0656793	0.466941
P62841	RS15_HUMAN	RPS15	40S ribosomal protein S15	1.50169	4	8.4381	29.0126	40.6618	15.4985	0.0346581	0.0717483	2.61119
Q9H078	CLPB_HUMAN	CLPB	Caseinolytic peptidase B protein homolog	12.0136	23	14.7667	26.7809	29.9614	25.8309	0.036305	0.0738619	0.730099
P49327	FAS_HUMAN	FASN	Fatty acid synthase	0	1	0	10.0428	11.7705	2.58309	0.051513	0.0986297	4.6086
Q7Z417	NUFP2_HUMAN	NUFIP2	Nuclear fragile X mental retardation-interacting protein 2	13.5153	23	18.9857	29.0126	34.2415	24.5394	0.0518224	0.0986297	0.661601
Q9Y224	RTRAF_HUMAN	RTRAF	RNA transcription, translation and transport factor protein	15.0169	19	15.8214	27.8967	26.7512	19.3732	0.0515409	0.0986297	0.57068
P62318	SMD3_HUMAN	SNRPD3	Small nuclear ribonucleoprotein Sm D3	16.5186	15	15.8214	23.4332	18.1908	19.3732	0.0506467	0.0986297	0.365682
O14654	IRS4_HUMAN	IRS4	Insulin receptor substrate 4	0	2	0	15.6222	7.49034	5.16618	0.0538545	0.100739	3.82164
O14874	BCKD_HUMAN	BCKDK	[3-methyl-2-oxobutanoate dehydrogenase [lipoamide]] kinase, mitochondrial	15.0169	20	17.931	33.4761	24.6111	23.2478	0.0546383	0.100739	0.619303
O00267	SPT5H_HUMAN	SUPT5H	Transcription elongation factor SPT5	15.0169	22	18.9857	27.8967	27.8213	21.9563	0.0626172	0.112134	0.471941
P54105	ICLN_HUMAN	CLNS1A	Methylosome subunit pICln	25.5288	23	22.15	26.7809	32.1014	27.1224	0.0627193	0.112134	0.283139
P35232	PHB_HUMAN	PHB	Prohibitin	0	4	1.05476	8.92695	6.42029	3.87464	0.0665586	0.117223	1.92703
Q9Y520	PRC2C_HUMAN	PRRC2C	Protein PRRC2C	0	5	4.21905	13.3904	13.9106	5.16618	0.0744174	0.129136	1.81629
P84098	RL19_HUMAN	RPL19	60S ribosomal protein L19	0	1	2.10952	11.1587	7.49034	2.58309	0.0775136	0.132559	2.77148
Q01844	EWS_HUMAN	EWSR1	RNA-binding protein EWS	13.5153	22	21.0952	25.665	23.5411	28.414	0.0824346	0.138961	0.45536
O14744	ANM5_HUMAN	PRMT5	Protein arginine N-methyltransferase 5	171.193	187	181.419	254.418	253.601	187.274	0.0844345	0.140328	0.365699
O00541	PESC_HUMAN	PES1	Pescadillo homolog	10.5119	11	8.4381	25.665	20.3309	11.6239	0.0912675	0.149357	0.944011
P62424	RL7A_HUMAN	RPL7A	60S ribosomal protein L7a	3.00339	8	5.27381	8.92695	10.7005	7.74927	0.0923989	0.149357	0.750096
P62979	RS27A_HUMAN	RPS27A	Ubiquitin-40S ribosomal protein S27a	3.00339	2	1.05476	11.1587	10.7005	2.58309	0.0972618	0.155093	2.01243
P07814	SYEP_HUMAN	EPRS	Bifunctional glutamate/proline--tRNA ligase	0	5	3.16429	10.0428	9.63043	3.87464	0.106397	0.167397	1.5282
Q9BQA1	MEP50_HUMAN	MEP50	Methylosome protein 50	106.62	114	108.64	139.484	124.126	113.656	0.110054	0.170873	0.196348
P22061	PIMT_HUMAN	PCMT1	Protein-L-isoaspartate(D-aspartate) O-methyltransferase	24.0271	24	25.3143	26.7809	24.6111	28.414	0.142811	0.213792	0.121869
Q15233	NONO_HUMAN	NONO	Non-POU domain-containing octamer-binding protein	21.0237	19	15.8214	16.738	14.9807	15.4985	0.146919	0.216706	-0.242118
O95785	WIZ_HUMAN	WIZ	Protein Wiz	61.5695	78	79.1071	82.5743	88.814	80.0758	0.154618	0.225246	0.201553
O15371	EIF3D_HUMAN	EIF3D	Eukaryotic translation initiation factor 3 subunit D	6.00678	10	10.5476	18.9698	14.9807	9.04082	0.16407	0.236101	0.695093
Q08211	DHX9_HUMAN	DHX9	ATP-dependent RNA helicase A	19.522	23	15.8214	21.2015	27.8213	23.2478	0.178715	0.254077	0.308837
Q13310	PABP4_HUMAN	PABPC4	Polyadenylate-binding protein 4	4.50508	10	7.38333	7.81108	12.8406	11.6239	0.189666	0.266435	0.560275
Q52LJ0	FA98B_HUMAN	FAM98B	Protein FAM98B	4.50508	10	9.49286	14.5063	14.9807	7.74927	0.205296	0.282061	0.633797
O00165	HAX1_HUMAN	HAX1	HCLS1-associated protein X-1	7.50847	5	7.38333	11.1587	7.49034	7.74927	0.20557	0.282061	0.408271
P26373	RL13_HUMAN	RPL13	60S ribosomal protein L13	3.00339	6	6.32857	11.1587	12.8406	3.87464	0.229119	0.308557	0.862373
P23246	SFPQ_HUMAN	SFPQ	Splicing factor, proline- and glutamine-rich	19.522	28	16.8762	18.9698	11.7705	16.7901	0.23011	0.308557	-0.438171
P52272	HNRPM_HUMAN	HNRNPM	Heterogeneous nuclear ribonucleoprotein M	4.50508	19	14.7667	20.0856	18.1908	18.0816	0.238221	0.312923	0.558343
Q13263	TIF1B_HUMAN	TIF1B	Transcription intermediary factor 1-beta	12.0136	23	18.9857	22.3174	25.6812	20.6647	0.23867	0.312923	0.346598
P22626	ROA2_HUMAN	HNRNPA2B1	Heterogeneous nuclear ribonucleoproteins A2/B1	6.00678	10	8.4381	11.1587	14.9807	7.74927	0.25819	0.331157	0.47127
P62917	RL8_HUMAN	RPL8	60S ribosomal protein L8	4.50508	10	8.4381	11.1587	12.8406	7.74927	0.256132	0.331157	0.468625
P35637	FUS_HUMAN	FUS	RNA-binding protein FUS	4.50508	9	7.38333	10.0428	7.49034	9.04082	0.277688	0.352336	0.347311
P78347	GTF2I_HUMAN	GTF2I	General transcription factor II-I	51.0576	67	56.9571	70.2997	65.2729	59.4111	0.301637	0.37865	0.155877
P60228	EIF3E_HUMAN	EIF3E	Eukaryotic translation initiation factor 3 subunit E	3.00339	5	5.27381	12.2746	12.8406	1.29155	0.316519	0.39315	0.991952
Q53EL6	PDCD4_HUMAN	PDCD4	Programmed cell death protein 4	0	7	5.27381	8.92695	12.8406	2.58309	0.332638	0.408868	0.988376
Q9Y697	NFS1_HUMAN	NFS1	Cysteine desulfurase, mitochondrial	4.50508	9	8.4381	5.57935	6.42029	5.16618	0.337086	0.410064	-0.354234
O15372	EIF3H_HUMAN	EIF3H	Eukaryotic translation initiation factor 3 subunit H	1.50169	5	5.27381	8.92695	7.49034	2.58309	0.348949	0.420163	0.690239
Q9BRS2	RIOK1_HUMAN	RIOK1	Serine/threonine-protein kinase RIO1	443	443	443	443	443	443	0.373901	0.44566	0
Q92945	FUBP2_HUMAN	FUBP2	Far upstream element-binding protein 2	10.5119	10	9.49286	7.81108	5.35024	11.6239	0.399904	0.467214	-0.275709
Q9Y2J2	E41L3_HUMAN	EPB41L3	Band 4.1-like protein 3	22.5254	26	32.6976	29.0126	41.7319	25.8309	0.420168	0.486077	0.249766
O14730	RIOK3_HUMAN	RIOK3	Serine/threonine-protein kinase RIO3	3.00339	7	5.27381	5.57935	8.56039	5.16618	0.442066	0.506444	0.337663
Q14152	EIF3A_HUMAN	EIF3A	Eukaryotic translation initiation factor 3 subunit A	13.5153	39	32.6976	49.0982	50.2923	18.0816	0.455741	0.517091	0.463175
P31943	HNRH1_HUMAN	HNRNPH1	Heterogeneous nuclear ribonucleoprotein H	34.539	43	42.1905	37.9395	42.8019	49.0787	0.468341	0.526327	0.116737
Q8N3C0	ASCC3_HUMAN	ASCC3	Activating signal cointegrator 1 complex subunit 3	1.50169	9	4.21905	10.0428	9.63043	2.58309	0.484677	0.539546	0.596366
P19784	CSK22_HUMAN	CSNK2A2	Casein kinase II subunit alpha'	54.061	54	47.4643	49.0982	53.5024	46.4956	0.513879	0.566708	-0.0609051
P22087	FBRL_HUMAN	FBL	rRNA 2'-O-methyltransferase fibrillarin	9.01017	11	8.4381	8.92695	6.42029	10.3324	0.541014	0.591107	-0.147718
Q13347	EIF3I_HUMAN	EIF3I	Eukaryotic translation initiation factor 3 subunit I	10.5119	18	21.0952	22.3174	16.0507	18.0816	0.56529	0.611965	0.18642
Q14137	BOP1_HUMAN	BOP1	Ribosome biogenesis protein BOP1	3.00339	3	4.21905	10.0428	5.35024	0	0.58791	0.630667	0.590541
Q00839	HNRPU_HUMAN	HNRNPU	Heterogeneous nuclear ribonucleoprotein U	15.0169	31	21.0952	24.5491	34.2415	19.3732	0.594515	0.632007	0.219927
P09651	ROA1_HUMAN	HNRNPA1	Heterogeneous nuclear ribonucleoprotein A1	15.0169	15	10.5476	15.6222	11.7705	16.7901	0.600482	0.632651	0.123264
P55884	EIF3B_HUMAN	EIF3B	Eukaryotic translation initiation factor 3 subunit B	3.00339	8	3.16429	5.57935	11.7705	1.29155	0.688287	0.718742	0.395909
Q9C0C9	UBE2O_HUMAN	UBE2O	(E3-independent) E2 ubiquitin-conjugating enzyme	22.5254	31	21.0952	31.2443	21.401	25.8309	0.774965	0.802157	0.0726801
P67870	CSK2B_HUMAN	CSNK2B	Casein kinase II subunit beta	31.5356	46	49.5738	44.6348	42.8019	42.621	0.868098	0.890745	0.0330809
Q14011	CIRBP_HUMAN	CIRBP	Cold-inducible RNA-binding protein	25.5288	15	16.8762	18.9698	20.3309	16.7901	0.903769	0.911493	-0.0334129
Q96AE4	FUBP1_HUMAN	FUBP1	Far upstream element-binding protein 1	3.00339	10	4.21905	5.57935	4.28019	6.45773	0.89976	0.911493	-0.0778901
P55795	HNRH2_HUMAN	HNRNPH2	Heterogeneous nuclear ribonucleoprotein H2	6.00678	11	5.27381	6.69521	9.63043	6.45773	0.939308	0.939308	0.0321941
1Spectral counts after normalization to spectral counts of the bait (RIOK1) identified in RIOK1-StHA_II
Hits with an adjusted p value >0.05
Hits with an adjusted p value <0.05 but with a log2FC <1
