# Supplementary material for: USP16 counteracts mono-ubiquitination of RPS27a and promotes maturation of the 40S ribosomal subunit
Source: eLife. 2020 Mar 4;9:e54435. doi: 10.7554/eLife.54435 (PMC7065907; doi:10.7554/eLife.54435)
Supplement: Supplementary file 3. — S3-1 Spectral counts of proteins identified on HASt-GFP, USP16(WT)- and USP16(C205S)-StHA in three independent biological replicates (I-III). S3-2 Spectral counts of proteins identified on RIOK1(WT)- and RIOK1(kd)-StHA after normalization. Spectral counts were normalized to protein length (spectral counts per 1000 amino acids) and to spectral counts of the USP16(WT)-StHA bait in replicate II after filtering against the HASt-GFP control. [file elife-54435-supp3.xlsx]

## Sheet: Identified proteins
Table S3-1. Spectral counts of proteins identified on HASt-GFP, USP16(WT)- and USP16(C205S)-StHA
UniProt Name	Description	HASt-GFP_I	HASt-GFP_II	HASt-GFP_III	USP16-StHA_I	USP16-StHA_II	USP16-StHA_III	USP16(C205S)-StHA_I	USP16(C205S)-StHA_II	USP16(C205S)-StHA_III
UBP16_HUMAN	Ubiquitin carboxyl-terminal hydrolase 16	3	1	0	230	424	334	218	139	290
EIF3A_HUMAN	Eukaryotic translation initiation factor 3 subunit A	0	1	0	139	181	114	89	48	112
K2C1_HUMAN	Keratin, type II cytoskeletal 1	174	138	109	129	149	100	120	84	125
ATX2L_HUMAN	Ataxin-2-like protein	90	96	74	111	148	128	109	96	117
K1C10_HUMAN	Keratin, type I cytoskeletal 10	87	68	65	87	95	79	75	64	93
NUCL_HUMAN	Nucleolin	9	8	1	80	116	86	54	45	85
TSR1_HUMAN	Pre-rRNA-processing protein TSR1 homolog	0	0	0	76	109	103	30	24	53
RS3_HUMAN	40S ribosomal protein S3	4	3	3	68	100	87	42	25	53
SND1_HUMAN	Staphylococcal nuclease domain-containing protein 1	1	1	1	66	109	101	34	30	55
RS11_HUMAN	40S ribosomal protein S11	3	5	2	63	83	69	39	30	49
RS3A_HUMAN	40S ribosomal protein S3a	9	7	4	60	97	90	41	41	69
RS8_HUMAN	40S ribosomal protein S8	3	5	3	56	77	61	42	28	51
RRP12_HUMAN	RRP12-like protein	0	0	0	55	79	61	33	16	44
RS6_HUMAN	40S ribosomal protein S6	3	4	3	55	68	58	34	25	53
VIGLN_HUMAN	Vigilin	0	0	0	48	78	68	14	7	29
RS16_HUMAN	40S ribosomal protein S16	2	4	0	44	57	46	31	28	40
RS19_HUMAN	40S ribosomal protein S19	2	4	3	44	58	42	27	20	43
RACK1_HUMAN	Receptor of activated protein C kinase 1	3	3	2	42	66	61	25	15	30
K22E_HUMAN	Keratin, type II cytoskeletal 2 epidermal	97	60	68	41	78	58	82	54	81
LTV1_HUMAN	Protein LTV1 homolog	0	0	0	39	47	44	24	15	47
K1C9_HUMAN	Keratin, type I cytoskeletal 9	95	57	41	37	69	42	53	36	51
RL4_HUMAN	60S ribosomal protein L4	4	4	2	37	67	47	21	15	33
BYST_HUMAN	Bystin	0	0	0	35	51	53	23	17	33
EIF3B_HUMAN	Eukaryotic translation initiation factor 3 subunit B	1	2	1	35	58	42	31	16	36
NOB1_HUMAN	RNA-binding protein NOB1	0	0	0	35	39	34	32	13	31
EIF3D_HUMAN	Eukaryotic translation initiation factor 3 subunit D	0	0	0	34	55	44	24	20	31
RSSA_HUMAN	40S ribosomal protein SA	3	5	5	34	64	47	24	19	34
DHX9_HUMAN	ATP-dependent RNA helicase A	4	4	1	33	42	27	22	10	27
ODB2_HUMAN	Lipoamide acyltransferase component of branched-chain alpha-keto acid dehydrogenase complex, mitochondrial	12	13	13	33	43	65	33	35	43
RS2_HUMAN	40S ribosomal protein S2	3	2	1	33	76	61	21	23	35
DDX6_HUMAN	Probable ATP-dependent RNA helicase DDX6	24	30	14	32	45	47	32	14	34
HAP28_HUMAN	28 kDa heat- and acid-stable phosphoprotein	0	0	0	31	35	34	14	15	28
RS7_HUMAN	40S ribosomal protein S7	4	4	0	31	70	58	22	10	45
LYRIC_HUMAN	Protein LYRIC	0	0	0	30	39	38	10	10	27
RS12_HUMAN	40S ribosomal protein S12	3	3	1	30	39	37	19	12	33
RS14_HUMAN	40S ribosomal protein S14	2	5	3	30	44	44	24	30	31
RS18_HUMAN	40S ribosomal protein S18	0	2	0	30	48	41	26	10	27
RS9_HUMAN	40S ribosomal protein S9	1	0	0	29	44	40	25	10	34
HNRPU_HUMAN	Heterogeneous nuclear ribonucleoprotein U	6	7	3	28	50	39	21	13	35
RL7A_HUMAN	60S ribosomal protein L7a	4	7	3	28	44	34	17	11	32
RS4X_HUMAN	40S ribosomal protein S4, X isoform	2	1	1	28	52	42	17	12	30
RS5_HUMAN	40S ribosomal protein S5	1	1	2	28	48	39	18	15	36
EIF3L_HUMAN	Eukaryotic translation initiation factor 3 subunit L	0	0	0	27	35	33	25	9	24
RL6_HUMAN	60S ribosomal protein L6	5	4	2	27	34	32	22	14	29
EIF3H_HUMAN	Eukaryotic translation initiation factor 3 subunit H	0	0	0	26	42	29	14	9	18
PDCD4_HUMAN	Programmed cell death protein 4	0	0	0	25	33	28	17	17	24
PNO1_HUMAN	RNA-binding protein PNO1	0	0	0	25	42	19	10	7	18
RL3_HUMAN	60S ribosomal protein L3	1	2	2	25	40	26	15	11	24
HSP7C_HUMAN	Heat shock cognate 71 kDa protein	15	21	16	24	24	34	17	20	23
IF4A1_HUMAN	Eukaryotic initiation factor 4A-I	0	0	0	24	39	42	6	13	18
RS21_HUMAN	40S ribosomal protein S21	1	1	0	24	37	41	16	17	29
EIF3E_HUMAN	Eukaryotic translation initiation factor 3 subunit E	0	0	0	23	28	30	13	9	17
IF4G1_HUMAN	Eukaryotic translation initiation factor 4 gamma 1	0	1	0	23	42	26	13	12	30
PAIRB_HUMAN	Plasminogen activator inhibitor 1 RNA-binding protein	1	1	1	23	34	30	14	7	25
PIMT_HUMAN	Protein-L-isoaspartate(D-aspartate) O-methyltransferase	13	15	10	23	30	26	11	11	19
RL13_HUMAN	60S ribosomal protein L13	5	4	5	23	31	24	19	13	33
RS10_HUMAN	40S ribosomal protein S10	0	1	0	23	23	24	13	9	20
SC16A_HUMAN	Protein transport protein Sec16A	23	27	7	23	27	10	6	6	7
EIF3I_HUMAN	Eukaryotic translation initiation factor 3 subunit I	0	2	0	22	43	28	19	14	25
IF4G2_HUMAN	Eukaryotic translation initiation factor 4 gamma 2	0	0	0	22	29	19	7	8	12
LARP1_HUMAN	La-related protein 1	0	0	0	22	33	26	12	9	26
RL5_HUMAN	60S ribosomal protein L5	1	3	2	22	36	34	13	15	31
RS17_HUMAN	40S ribosomal protein S17	1	0	0	22	39	44	18	9	29
ALBU_HUMAN	Serum albumin	14	19	11	21	42	25	16	6	11
RL18_HUMAN	60S ribosomal protein L18	1	5	3	21	18	18	12	9	21
RS13_HUMAN	40S ribosomal protein S13	1	1	0	21	50	31	16	4	26
BIP_HUMAN	Endoplasmic reticulum chaperone BiP	17	22	14	20	22	19	14	5	17
CLH1_HUMAN	Clathrin heavy chain 1	14	17	5	20	20	22	18	10	20
DDX21_HUMAN	Nucleolar RNA helicase 2	0	0	0	20	32	27	9	7	17
DESP_HUMAN	Desmoplakin	31	8	10	20	24	9	10	7	22
EIF2D_HUMAN	Eukaryotic translation initiation factor 2D	0	0	0	20	21	17	7	3	10
K2C5_HUMAN	Keratin, type II cytoskeletal 5	12	15	11	20	23	21	15	15	18
MCMBP_HUMAN	Mini-chromosome maintenance complex-binding protein	12	16	7	20	17	17	11	8	21
RL19_HUMAN	60S ribosomal protein L19	2	3	2	20	21	18	16	11	16
RL28_HUMAN	60S ribosomal protein L28	0	1	0	20	23	24	10	13	23
RL8_HUMAN	60S ribosomal protein L8	4	5	2	20	28	23	19	10	23
ASCC3_HUMAN	Activating signal cointegrator 1 complex subunit 3	0	0	0	19	28	23	6	4	17
EIF3G_HUMAN	Eukaryotic translation initiation factor 3 subunit G	0	1	0	19	33	27	14	7	23
GLYM_HUMAN	Serine hydroxymethyltransferase, mitochondrial	22	25	14	19	27	28	30	19	31
RS15A_HUMAN	40S ribosomal protein S15a	0	1	0	19	42	32	11	9	22
RS24_HUMAN	40S ribosomal protein S24	1	1	0	19	36	36	10	11	20
RS25_HUMAN	40S ribosomal protein S25	0	1	0	19	33	21	10	7	15
EIF3F_HUMAN	Eukaryotic translation initiation factor 3 subunit F	0	0	0	18	30	23	13	10	17
NPM_HUMAN	Nucleophosmin	5	5	4	18	28	23	19	15	27
RL24_HUMAN	60S ribosomal protein L24	1	1	1	18	18	11	13	7	19
RIOK2_HUMAN	Serine/threonine-protein kinase RIO2	0	0	0	17	26	20	3	4	9
RL7_HUMAN	60S ribosomal protein L7	3	1	1	17	27	17	9	12	18
RS20_HUMAN	40S ribosomal protein S20	1	2	1	17	26	19	14	11	16
RS28_HUMAN	40S ribosomal protein S28	1	2	0	17	29	25	15	10	20
TIF1B_HUMAN	Transcription intermediary factor 1-beta	12	17	11	17	24	26	14	11	30
ECHA_HUMAN	Trifunctional enzyme subunit alpha, mitochondrial	0	0	0	16	35	14	7	4	14
RL38_HUMAN	60S ribosomal protein L38	3	3	0	16	22	14	10	4	12
RS23_HUMAN	40S ribosomal protein S23	0	0	0	16	21	21	14	8	28
RS27A_HUMAN	Ubiquitin-40S ribosomal protein S27a	0	0	0	16	25	22	11	15	15
SET_HUMAN	Protein SET	13	15	9	16	21	17	19	8	23
EF2_HUMAN	Elongation factor 2	3	4	1	15	18	19	13	8	26
ILF3_HUMAN	Interleukin enhancer-binding factor 3	0	1	0	15	17	18	6	5	10
PRC2C_HUMAN	Protein PRRC2C	0	0	0	15	33	14	8	4	11
RL18A_HUMAN	60S ribosomal protein L18a	0	1	1	15	19	19	10	9	19
TRFL_HUMAN	Lactotransferrin	5	3	4	15	30	5	4	3	3
UT14A_HUMAN	U3 small nucleolar RNA-associated protein 14 homolog A	0	0	0	15	20	14	4	3	13
ABCE1_HUMAN	ATP-binding cassette sub-family E member 1	0	0	0	14	21	12	9	3	6
FLNA_HUMAN	Filamin-A	7	10	7	14	9	4	9	7	9
NUFP2_HUMAN	Nuclear fragile X mental retardation-interacting protein 2	6	6	6	14	18	15	7	8	11
PABP4_HUMAN	Polyadenylate-binding protein 4	0	1	1	14	20	18	9	7	12
PDIP3_HUMAN	Polymerase delta-interacting protein 3	14	11	9	14	17	15	13	9	12
PYC_HUMAN	Pyruvate carboxylase, mitochondrial	22	29	17	14	17	17	23	13	11
RL12_HUMAN	60S ribosomal protein L12	4	3	3	14	20	11	13	7	13
RL9_HUMAN	60S ribosomal protein L9	2	2	2	14	17	16	10	6	17
ATPB_HUMAN	ATP synthase subunit beta, mitochondrial	7	9	6	13	11	18	14	8	15
RL17_HUMAN	60S ribosomal protein L17	0	5	3	13	23	22	9	9	18
RL27_HUMAN	60S ribosomal protein L27	2	1	0	13	19	18	10	5	13
SNP23_HUMAN	Synaptosomal-associated protein 23	9	7	6	13	14	14	14	11	20
SYEP_HUMAN	Bifunctional glutamate/proline--tRNA ligase	2	2	2	13	25	16	8	9	19
VIME_HUMAN	Vimentin	3	3	3	13	9	7	9	5	6
IF2B1_HUMAN	Insulin-like growth factor 2 mRNA-binding protein 1	1	1	0	12	14	16	9	4	11
LAR4B_HUMAN	La-related protein 4B	0	0	0	12	21	13	3	4	12
PA2G4_HUMAN	Proliferation-associated protein 2G4	0	0	0	12	20	12	5	3	8
PRC2A_HUMAN	Protein PRRC2A	0	0	0	12	23	15	9	3	11
PRC2B_HUMAN	Protein PRRC2B	0	0	0	12	23	13	5	3	11
RIOK1_HUMAN	Serine/threonine-protein kinase RIO1	0	0	0	12	15	14	3	2	4
RL10A_HUMAN	60S ribosomal protein L10a	3	4	1	12	20	14	7	7	14
ROA2_HUMAN	Heterogeneous nuclear ribonucleoproteins A2/B1	6	4	2	12	21	16	8	9	13
RS29_HUMAN	40S ribosomal protein S29	0	0	0	12	12	9	9	3	11
SBDS_HUMAN	Ribosome maturation protein SBDS	0	0	0	12	13	3	3	1	3
TRIP4_HUMAN	Activating signal cointegrator 1	0	0	0	12	19	13	5	1	9
ATPA_HUMAN	ATP synthase subunit alpha, mitochondrial	6	10	6	11	14	19	11	13	13
F207A_HUMAN	Protein FAM207A	0	0	0	11	17	10	4	0	6
MCRI1_HUMAN	Mapk-regulated corepressor-interacting protein 1	11	10	9	11	12	12	11	7	10
PARN_HUMAN	Poly(A)-specific ribonuclease PARN	0	0	0	11	27	19	3	1	5
RL21_HUMAN	60S ribosomal protein L21	0	0	0	11	18	14	11	7	11
CKAP4_HUMAN	Cytoskeleton-associated protein 4	0	0	0	10	14	17	7	3	12
DHX37_HUMAN	Probable ATP-dependent RNA helicase DHX37	0	0	0	10	11	6	0	1	3
DSG1_HUMAN	Desmoglein-1	13	10	5	10	15	9	8	6	8
EIF3M_HUMAN	Eukaryotic translation initiation factor 3 subunit M	0	0	0	10	15	12	1	1	4
HNRDL_HUMAN	Heterogeneous nuclear ribonucleoprotein D-like	0	3	0	10	9	5	3	3	4
ILF2_HUMAN	Interleukin enhancer-binding factor 2	1	1	0	10	15	13	7	7	11
K1C14_HUMAN	Keratin, type I cytoskeletal 14	12	8	7	10	13	6	5	2	13
KC1E_HUMAN	Casein kinase I isoform epsilon	0	0	0	10	15	11	5	3	7
OTU6B_HUMAN	OTU domain-containing protein 6B	0	0	0	10	19	15	5	3	10
RL10_HUMAN	60S ribosomal protein L10	0	0	0	10	13	15	5	4	10
RL35A_HUMAN	60S ribosomal protein L35a	0	1	1	10	14	10	4	4	9
RLA2_HUMAN	60S acidic ribosomal protein P2	3	5	1	10	21	14	8	4	10
RS27_HUMAN	40S ribosomal protein S27	1	1	0	10	9	12	3	3	6
S10A9_HUMAN	Protein S100-A9	7	3	1	10	17	8	6	0	4
SYFB_HUMAN	Phenylalanine--tRNA ligase beta subunit	0	1	0	10	17	10	5	2	8
BUD23_HUMAN	Probable 18S rRNA (guanine-N(7))-methyltransferase	0	0	0	9	7	8	1	1	6
DDX5_HUMAN	Probable ATP-dependent RNA helicase DDX5	1	1	0	9	13	6	3	3	4
DLDH_HUMAN	Dihydrolipoyl dehydrogenase, mitochondrial	3	7	6	9	10	56	13	8	10
EIF3K_HUMAN	Eukaryotic translation initiation factor 3 subunit K	0	0	0	9	13	10	6	3	11
IF6_HUMAN	Eukaryotic translation initiation factor 6	3	2	0	9	14	11	9	4	11
KPRP_HUMAN	Keratinocyte proline-rich protein	21	11	10	9	16	11	12	10	13
LRC59_HUMAN	Leucine-rich repeat-containing protein 59	0	0	0	9	18	14	5	3	13
LSM12_HUMAN	Protein LSM12 homolog	10	9	5	9	11	10	7	5	11
LYAR_HUMAN	Cell growth-regulating nucleolar protein	0	0	0	9	11	11	7	2	4
MCCB_HUMAN	Methylcrotonoyl-CoA carboxylase beta chain, mitochondrial	30	25	21	9	13	14	17	13	23
NOP14_HUMAN	Nucleolar protein 14	0	0	0	9	14	5	1	2	1
RL14_HUMAN	60S ribosomal protein L14	1	3	2	9	18	9	7	4	10
RL15_HUMAN	60S ribosomal protein L15	0	1	0	9	13	9	6	3	8
RL22_HUMAN	60S ribosomal protein L22	1	1	0	9	9	5	2	4	5
RL23_HUMAN	60S ribosomal protein L23	2	3	3	9	18	13	7	4	13
RL23A_HUMAN	60S ribosomal protein L23a	2	2	2	9	16	13	4	5	12
RL29_HUMAN	60S ribosomal protein L29	1	2	0	9	10	5	6	2	13
RL35_HUMAN	60S ribosomal protein L35	0	1	0	9	12	8	5	1	11
ROA1_HUMAN	Heterogeneous nuclear ribonucleoprotein A1	4	5	4	9	11	12	5	6	5
ASCC2_HUMAN	Activating signal cointegrator 1 complex subunit 2	0	0	0	8	11	9	2	1	4
CALL5_HUMAN	Calmodulin-like protein 5	5	3	5	8	9	4	6	2	3
CC124_HUMAN	Coiled-coil domain-containing protein 124	1	1	1	8	13	11	9	5	10
HNRPD_HUMAN	Heterogeneous nuclear ribonucleoprotein D0	4	3	1	8	9	8	8	1	6
HORN_HUMAN	Hornerin	12	4	5	8	11	3	1	2	1
IF4A2_HUMAN	Eukaryotic initiation factor 4A-II	0	0	0	8	8	7	4	4	3
ODO2_HUMAN	Dihydrolipoyllysine-residue succinyltransferase component of 2-oxoglutarate dehydrogenase complex, mitochondrial	2	3	1	8	6	57	11	6	5
PDIA6_HUMAN	Protein disulfide-isomerase A6	4	4	3	8	3	6	6	3	6
PLAK_HUMAN	Junction plakoglobin	9	10	4	8	8	8	4	6	7
PYM1_HUMAN	Partner of Y14 and mago	0	0	0	8	12	11	6	2	15
RBM14_HUMAN	RNA-binding protein 14	3	0	0	8	6	5	3	4	5
RBM4_HUMAN	RNA-binding protein 4	0	0	0	8	8	6	3	2	2
RL31_HUMAN	60S ribosomal protein L31	0	0	0	8	11	10	9	4	7
SRP14_HUMAN	Signal recognition particle 14 kDa protein	3	1	3	8	12	11	4	4	12
STAU1_HUMAN	Double-stranded RNA-binding protein Staufen homolog 1	0	0	0	8	9	11	3	3	8
TERA_HUMAN	Transitional endoplasmic reticulum ATPase	20	25	14	8	4	7	12	6	10
CIRBP_HUMAN	Cold-inducible RNA-binding protein	0	0	0	7	5	4	0	0	3
EIF3J_HUMAN	Eukaryotic translation initiation factor 3 subunit J	0	0	0	7	18	15	8	7	12
HNRH3_HUMAN	Heterogeneous nuclear ribonucleoprotein H3	3	3	4	7	8	5	4	3	3
K1C16_HUMAN	Keratin, type I cytoskeletal 16	8	6	3	7	11	9	5	10	20
K2C1B_HUMAN	Keratin, type II cytoskeletal 1b	6	4	8	7	7	8	7	4	6
MBB1A_HUMAN	Myb-binding protein 1A	0	0	0	7	5	7	2	1	4
NOG1_HUMAN	Nucleolar GTP-binding protein 1	0	0	0	7	5	2	5	2	8
NOP2_HUMAN	Probable 28S rRNA (cytosine(4447)-C(5))-methyltransferase	0	0	0	7	5	3	2	3	4
RL11_HUMAN	60S ribosomal protein L11	4	3	2	7	14	9	9	7	16
RL13A_HUMAN	60S ribosomal protein L13a	0	1	1	7	13	6	3	0	8
RL30_HUMAN	60S ribosomal protein L30	1	2	2	7	19	15	4	7	13
ROAA_HUMAN	Heterogeneous nuclear ribonucleoprotein A/B	3	2	1	7	11	8	5	2	12
RS15_HUMAN	40S ribosomal protein S15	0	0	0	7	15	19	1	2	5
RT07_HUMAN	28S ribosomal protein S7, mitochondrial	3	3	0	7	12	5	4	2	4
XRCC6_HUMAN	X-ray repair cross-complementing protein 6	0	1	0	7	4	6	4	2	5
ZN622_HUMAN	Zinc finger protein 622	0	0	0	7	12	11	3	1	5
BCKD_HUMAN	[3-methyl-2-oxobutanoate dehydrogenase [lipoamide]] kinase, mitochondrial	1	1	0	6	4	12	4	5	10
CH60_HUMAN	60 kDa heat shock protein, mitochondrial	2	2	4	6	7	7	5	6	8
CLPB_HUMAN	Caseinolytic peptidase B protein homolog	6	6	4	6	11	12	5	2	7
DHX29_HUMAN	ATP-dependent RNA helicase DHX29	0	0	0	6	12	5	0	0	2
DIM1_HUMAN	Probable dimethyladenosine transferase	0	0	0	6	8	6	1	1	5
EIF3C_HUMAN	Eukaryotic translation initiation factor 3 subunit C	0	0	0	6	3	2	4	3	6
HNRPM_HUMAN	Heterogeneous nuclear ribonucleoprotein M	0	0	0	6	6	8	2	3	4
IMA1_HUMAN	Importin subunit alpha-1	0	3	0	6	5	1	2	3	3
ODBB_HUMAN	2-oxoisovalerate dehydrogenase subunit beta, mitochondrial	3	4	3	6	10	7	6	7	7
PABP1_HUMAN	Polyadenylate-binding protein 1	0	0	0	6	12	11	4	3	9
PARP1_HUMAN	Poly [ADP-ribose] polymerase 1	1	3	0	6	8	7	3	3	4
RIOK3_HUMAN	Serine/threonine-protein kinase RIO3	0	0	0	6	8	2	2	2	5
RL27A_HUMAN	60S ribosomal protein L27a	3	3	1	6	8	9	9	5	9
RPN1_HUMAN	Dolichyl-diphosphooligosaccharide--protein glycosyltransferase subunit 1	1	1	0	6	6	3	5	3	4
SRP09_HUMAN	Signal recognition particle 9 kDa protein	4	1	2	6	6	6	2	3	2
SRSF3_HUMAN	Serine/arginine-rich splicing factor 3	1	1	1	6	7	3	3	2	6
THOC4_HUMAN	THO complex subunit 4	8	4	7	6	12	9	5	6	7
ANM5_HUMAN	Protein arginine N-methyltransferase 5	0	0	0	5	13	7	0	1	9
ANXA1_HUMAN	Annexin A1	1	1	1	5	8	1	5	0	3
CAPR1_HUMAN	Caprin-1	0	0	0	5	7	6	0	1	5
DDB1_HUMAN	DNA damage-binding protein 1	2	5	1	5	5	4	3	0	2
DDX1_HUMAN	ATP-dependent RNA helicase DDX1	0	1	1	5	20	8	3	3	4
DDX17_HUMAN	Probable ATP-dependent RNA helicase DDX17	0	0	0	5	8	7	2	2	2
DMRT3_HUMAN	Doublesex- and mab-3-related transcription factor 3	4	4	3	5	3	6	6	3	4
ENOA_HUMAN	Alpha-enolase	2	3	3	5	4	13	3	2	3
FILA2_HUMAN	Filaggrin-2	5	3	5	5	9	3	2	0	4
G3P_HUMAN	Glyceraldehyde-3-phosphate dehydrogenase	5	4	5	5	7	9	5	2	5
HERC2_HUMAN	E3 ubiquitin-protein ligase HERC2	0	0	0	5	6	3	2	1	6
HNRL1_HUMAN	Heterogeneous nuclear ribonucleoprotein U-like protein 1	0	0	0	5	8	10	2	1	2
HNRPQ_HUMAN	Heterogeneous nuclear ribonucleoprotein Q	1	1	0	5	11	8	3	1	5
IF2B_HUMAN	Eukaryotic translation initiation factor 2 subunit 2	0	0	0	5	11	8	3	0	2
LRC47_HUMAN	Leucine-rich repeat-containing protein 47	0	0	0	5	6	7	3	2	3
MCRI2_HUMAN	MAPK regulated corepressor interacting protein 2	0	0	1	5	6	3	3	2	2
NOC4L_HUMAN	Nucleolar complex protein 4 homolog	0	0	0	5	8	3	0	0	1
ODPA_HUMAN	Pyruvate dehydrogenase E1 component subunit alpha, somatic form, mitochondrial	2	5	1	5	5	3	6	2	3
ODPB_HUMAN	Pyruvate dehydrogenase E1 component subunit beta, mitochondrial	1	3	1	5	4	4	4	3	3
RBM33_HUMAN	RNA-binding protein 33	1	3	1	5	4	1	4	1	3
RL32_HUMAN	60S ribosomal protein L32	0	0	0	5	11	15	3	4	12
RL34_HUMAN	60S ribosomal protein L34	1	1	2	5	10	8	8	7	12
RRP1B_HUMAN	Ribosomal RNA processing protein 1 homolog B	0	0	0	5	6	3	1	1	4
SRSF5_HUMAN	Serine/arginine-rich splicing factor 5	0	0	0	5	5	4	1	0	1
SYIC_HUMAN	Isoleucine--tRNA ligase, cytoplasmic	0	2	0	5	8	4	3	2	4
SYMC_HUMAN	Methionine--tRNA ligase, cytoplasmic	0	0	0	5	8	1	3	1	7
TBB5_HUMAN	Tubulin beta chain	5	3	3	5	6	3	6	4	4
TR112_HUMAN	Multifunctional methyltransferase subunit TRM112-like protein	0	0	0	5	5	6	5	2	6
TUT7_HUMAN	Terminal uridylyltransferase 7	0	0	0	5	9	11	5	2	5
ZCCHV_HUMAN	Zinc finger CCCH-type antiviral protein 1	0	0	0	5	6	2	1	2	4
1433E_HUMAN	14-3-3 protein epsilon	0	1	0	4	3	6	2	3	4
ACTN1_HUMAN	Alpha-actinin-1	1	2	3	4	10	8	3	4	9
APOD_HUMAN	Apolipoprotein D	0	0	0	4	1	0	0	0	0
BRX1_HUMAN	Ribosome biogenesis protein BRX1 homolog	0	0	0	4	2	1	3	1	3
C1QBP_HUMAN	Complement component 1 Q subcomponent-binding protein, mitochondrial	6	6	2	4	3	4	4	0	5
COR1C_HUMAN	Coronin-1C	8	8	9	4	6	5	5	3	2
DCD_HUMAN	Dermcidin	7	6	4	4	6	5	4	3	5
ERI1_HUMAN	3'-5' exoribonuclease 1	0	0	0	4	6	5	2	0	5
G3BP1_HUMAN	Ras GTPase-activating protein-binding protein 1	0	0	0	4	11	7	1	2	6
GNL3_HUMAN	Guanine nucleotide-binding protein-like 3	0	0	0	4	11	7	3	4	9
GRP75_HUMAN	Stress-70 protein, mitochondrial	3	6	3	4	4	4	7	2	4
HS90A_HUMAN	Heat shock protein HSP 90-alpha	1	5	1	4	3	2	3	2	2
HS90B_HUMAN	Heat shock protein HSP 90-beta	4	3	1	4	4	6	2	1	2
IF2A_HUMAN	Eukaryotic translation initiation factor 2 subunit 1	1	0	0	4	14	8	1	1	2
IF2B3_HUMAN	Insulin-like growth factor 2 mRNA-binding protein 3	0	0	0	4	8	5	3	4	7
KPYM_HUMAN	Pyruvate kinase PKM	40	46	28	4	3	7	4	3	5
LARP4_HUMAN	La-related protein 4	0	0	0	4	14	10	2	1	5
MAP4_HUMAN	Microtubule-associated protein 4	1	1	1	4	4	6	5	5	5
NSUN2_HUMAN	tRNA (cytosine(34)-C(5))-methyltransferase	0	0	0	4	11	10	4	3	6
PHB_HUMAN	Prohibitin	2	2	1	4	8	7	6	0	5
RL1D1_HUMAN	Ribosomal L1 domain-containing protein 1	0	0	0	4	9	4	2	0	3
RL37A_HUMAN	60S ribosomal protein L37a	0	0	0	4	9	5	3	2	6
RTCB_HUMAN	tRNA-splicing ligase RtcB homolog	0	0	0	4	12	7	4	4	5
S10A8_HUMAN	Protein S100-A8	1	2	2	4	12	4	2	1	2
SRPK1_HUMAN	SRSF protein kinase 1	0	0	0	4	2	2	3	2	5
SYQ_HUMAN	Glutamine--tRNA ligase	0	0	0	4	8	0	2	0	3
TCPD_HUMAN	T-complex protein 1 subunit delta	4	5	1	4	4	2	2	0	2
TCPG_HUMAN	T-complex protein 1 subunit gamma	3	3	2	4	4	3	2	1	3
TGM3_HUMAN	Protein-glutamine gamma-glutamyltransferase E	4	0	2	4	4	1	1	2	2
XRCC5_HUMAN	X-ray repair cross-complementing protein 5	0	0	0	4	6	5	1	0	4
YBOX1_HUMAN	Nuclease-sensitive element-binding protein 1	0	0	0	4	6	5	1	1	3
ZA2G_HUMAN	Zinc-alpha-2-glycoprotein	8	3	2	4	8	1	2	2	3
1433Z_HUMAN	14-3-3 protein zeta/delta	0	0	0	3	2	3	0	0	1
ANXA2_HUMAN	Annexin A2	1	1	1	3	3	3	4	2	2
CATA_HUMAN	Catalase	5	1	1	3	2	0	1	1	3
CCAR2_HUMAN	Cell cycle and apoptosis regulator protein 2	1	2	1	3	3	2	5	2	4
CHERP_HUMAN	Calcium homeostasis endoplasmic reticulum protein	6	3	3	3	5	6	7	1	4
CLCA_HUMAN	Clathrin light chain A	2	5	2	3	2	1	2	0	4
DHX30_HUMAN	Putative ATP-dependent RNA helicase DHX30	0	0	0	3	7	5	2	2	3
DSC1_HUMAN	Desmocollin-1	4	2	3	3	2	2	2	2	2
EBP2_HUMAN	Probable rRNA-processing protein EBP2	0	0	0	3	5	2	4	2	6
FBRL_HUMAN	rRNA 2'-O-methyltransferase fibrillarin	0	0	0	3	1	5	0	0	2
G3BP2_HUMAN	Ras GTPase-activating protein-binding protein 2	0	0	0	3	5	4	0	0	3
GGYF2_HUMAN	GRB10-interacting GYF protein 2	0	0	0	3	5	2	0	0	4
GRPE1_HUMAN	GrpE protein homolog 1, mitochondrial	3	4	5	3	4	7	4	2	6
GTF2I_HUMAN	General transcription factor II-I	0	1	0	3	7	4	4	4	5
HNRPK_HUMAN	Heterogeneous nuclear ribonucleoprotein K	0	1	0	3	6	8	1	3	1
IF2G_HUMAN	Eukaryotic translation initiation factor 2 subunit 3	0	0	0	3	5	3	3	3	1
IF4E_HUMAN	Eukaryotic translation initiation factor 4E	0	0	0	3	3	4	2	0	4
KC1D_HUMAN	Casein kinase I isoform delta	0	0	0	3	1	4	0	0	4
MEP50_HUMAN	Methylosome protein 50	0	0	0	3	5	4	2	2	4
MMTA2_HUMAN	Multiple myeloma tumor-associated protein 2	0	0	0	3	4	5	1	1	2
NEUL4_HUMAN	Neuralized-like protein 4	0	0	0	3	4	1	2	0	5
ODBA_HUMAN	2-oxoisovalerate dehydrogenase subunit alpha, mitochondrial	2	1	1	3	5	27	10	11	11
ODP2_HUMAN	Dihydrolipoyllysine-residue acetyltransferase component of pyruvate dehydrogenase complex, mitochondrial	4	3	1	3	5	2	2	3	2
PESC_HUMAN	Pescadillo homolog	0	0	1	3	4	2	1	0	2
PGRC1_HUMAN	Membrane-associated progesterone receptor component 1	0	0	0	3	0	0	0	0	1
PRDX1_HUMAN	Peroxiredoxin-1	2	1	1	3	4	3	0	0	0
PRP19_HUMAN	Pre-mRNA-processing factor 19	0	0	0	3	6	4	1	0	2
PRS7_HUMAN	26S proteasome regulatory subunit 7	0	0	1	3	3	0	3	2	2
REPI1_HUMAN	Replication initiator 1	3	6	1	3	6	7	6	6	4
RL36A_HUMAN	60S ribosomal protein L36a	0	0	1	3	2	1	2	1	3
ROA0_HUMAN	Heterogeneous nuclear ribonucleoprotein A0	1	2	1	3	6	3	3	0	5
ROA3_HUMAN	Heterogeneous nuclear ribonucleoprotein A3	1	1	1	3	7	5	1	1	1
SDA1_HUMAN	Protein SDA1 homolog	0	0	0	3	0	0	0	0	0
SRSF1_HUMAN	Serine/arginine-rich splicing factor 1	0	0	0	3	3	1	0	0	1
SSBP_HUMAN	Single-stranded DNA-binding protein, mitochondrial	0	0	0	3	3	3	3	1	4
STIP1_HUMAN	Stress-induced-phosphoprotein 1	0	3	2	3	2	5	3	4	3
SYDC_HUMAN	Aspartate--tRNA ligase, cytoplasmic	0	0	0	3	5	3	2	1	0
SYRC_HUMAN	Arginine--tRNA ligase, cytoplasmic	2	1	0	3	7	3	1	2	2
TCPA_HUMAN	T-complex protein 1 subunit alpha	3	4	1	3	2	0	0	0	2
TCPB_HUMAN	T-complex protein 1 subunit beta	2	2	2	3	6	1	0	0	3
TPIS_HUMAN	Triosephosphate isomerase	2	1	3	3	3	7	2	2	1
TPR_HUMAN	Nucleoprotein TPR	0	2	0	3	5	0	4	3	1
YTHD3_HUMAN	YTH domain-containing family protein 3	0	1	1	3	2	1	2	2	2
ZBT11_HUMAN	Zinc finger and BTB domain-containing protein 11	0	0	0	3	5	0	1	1	3
ZN768_HUMAN	Zinc finger protein 768	0	1	0	3	4	0	0	0	2
A0A076FL24_9MONO	Enhanced green fluorescent protein	997	1156	839	2	1	0	37	29	42
ARGI1_HUMAN	Arginase-1	4	2	2	2	3	1	3	1	2
ATD3B_HUMAN	ATPase family AAA domain-containing protein 3B	0	0	0	2	2	1	1	0	1
CASPE_HUMAN	Caspase-14	2	3	2	2	4	1	3	1	2
CATD_HUMAN	Cathepsin D	1	1	2	2	5	0	2	0	3
CDC5L_HUMAN	Cell division cycle 5-like protein	0	0	0	2	6	1	1	1	1
CH10_HUMAN	10 kDa heat shock protein, mitochondrial	0	0	0	2	2	0	1	0	1
CKAP5_HUMAN	Cytoskeleton-associated protein 5	0	0	0	2	2	1	1	0	1
CLUS_HUMAN	Clusterin	0	0	0	2	0	0	0	0	3
CTND1_HUMAN	Catenin delta-1	0	0	1	2	4	4	4	3	3
DDX47_HUMAN	Probable ATP-dependent RNA helicase DDX47	0	0	0	2	1	0	0	1	0
DYHC1_HUMAN	Cytoplasmic dynein 1 heavy chain 1	3	2	1	2	7	3	7	2	5
ECHB_HUMAN	Trifunctional enzyme subunit beta, mitochondrial	0	0	0	2	9	6	7	1	6
EF1G_HUMAN	Elongation factor 1-gamma	2	3	1	2	8	8	1	2	5
ELAV1_HUMAN	ELAV-like protein 1	0	0	1	2	3	3	1	1	1
ERH_HUMAN	Enhancer of rudimentary homolog	0	2	1	2	0	0	0	2	1
EXOS7_HUMAN	Exosome complex component RRP42	0	0	0	2	0	0	0	0	0
EXOS9_HUMAN	Exosome complex component RRP45	0	0	0	2	1	0	1	1	2
FA98A_HUMAN	Protein FAM98A	0	0	0	2	4	4	0	0	1
GLO2_HUMAN	Hydroxyacylglutathione hydrolase, mitochondrial	3	3	2	2	2	2	2	3	2
GSLG1_HUMAN	Golgi apparatus protein 1	0	0	0	2	5	2	0	0	0
H1X_HUMAN	Histone H1x	0	0	0	2	4	3	1	1	6
H32_HUMAN	Histone H3.2	0	0	0	2	0	0	0	0	0
H4_HUMAN	Histone H4	1	3	0	2	4	3	0	0	1
HAX1_HUMAN	HCLS1-associated protein X-1	0	1	1	2	2	2	2	1	2
HCFC1_HUMAN	Host cell factor 1	0	0	2	2	1	0	0	2	1
HMGN2_HUMAN	Non-histone chromosomal protein HMG-17	3	2	0	2	1	1	2	0	3
HNRPC_HUMAN	Heterogeneous nuclear ribonucleoproteins C1/C2	0	0	0	2	4	2	0	1	1
HNRPF_HUMAN	Heterogeneous nuclear ribonucleoprotein F	1	1	0	2	2	2	2	0	0
HNRPL_HUMAN	Heterogeneous nuclear ribonucleoprotein L	1	1	0	2	3	4	1	0	2
HS74L_HUMAN	Heat shock 70 kDa protein 4L	1	3	1	2	1	0	1	2	2
HSP74_HUMAN	Heat shock 70 kDa protein 4	1	1	1	2	2	1	1	1	3
HSPB1_HUMAN	Heat shock protein beta-1	2	1	1	2	2	0	2	2	2
IF1AX_HUMAN	Eukaryotic translation initiation factor 1A, X-chromosomal	0	0	0	2	3	4	0	0	0
IF4B_HUMAN	Eukaryotic translation initiation factor 4B	0	0	0	2	6	3	3	3	2
IGHA1_HUMAN	Immunoglobulin heavy constant alpha 1	2	0	2	2	9	2	2	2	2
IMB1_HUMAN	Importin subunit beta-1	2	2	1	2	2	0	2	1	3
K2C78_HUMAN	Keratin, type II cytoskeletal 78	4	3	3	2	7	6	3	4	2
LEG7_HUMAN	Galectin-7	2	1	0	2	1	2	1	2	3
LORI_HUMAN	Loricrin	3	3	4	2	1	0	1	1	2
LYSC_HUMAN	Lysozyme C	2	4	2	2	7	1	4	1	3
MOV10_HUMAN	Putative helicase MOV-10	0	0	0	2	5	1	0	2	1
MRP_HUMAN	MARCKS-related protein	3	4	2	2	2	2	2	2	2
MRT4_HUMAN	mRNA turnover protein 4 homolog	0	0	0	2	3	2	0	0	2
MYH9_HUMAN	Myosin-9	0	1	0	2	3	1	2	0	1
NH2L1_HUMAN	NHP2-like protein 1	0	0	0	2	3	1	1	0	3
NOL6_HUMAN	Nucleolar protein 6	0	0	0	2	4	5	0	0	1
ODO1_HUMAN	2-oxoglutarate dehydrogenase, mitochondrial	0	2	0	2	1	69	5	3	0
OSBL8_HUMAN	Oxysterol-binding protein-related protein 8	0	0	0	2	1	2	1	0	1
PDD2L_HUMAN	Programmed cell death protein 2-like	0	0	0	2	4	2	2	0	3
PGAM5_HUMAN	Serine/threonine-protein phosphatase PGAM5, mitochondrial	0	0	0	2	8	8	0	4	6
PKP1_HUMAN	Plakophilin-1	1	0	0	2	1	0	0	0	0
PP1R7_HUMAN	Protein phosphatase 1 regulatory subunit 7	2	2	1	2	2	0	2	1	1
PRDX6_HUMAN	Peroxiredoxin-6	2	0	1	2	0	1	1	0	2
PRKDC_HUMAN	DNA-dependent protein kinase catalytic subunit	0	0	0	2	0	1	3	0	4
PROF1_HUMAN	Profilin-1	0	0	0	2	2	2	0	0	1
PRS6A_HUMAN	26S proteasome regulatory subunit 6A	1	1	0	2	1	2	0	0	2
PSA1_HUMAN	Proteasome subunit alpha type-1	2	2	2	2	1	0	2	1	2
PSA6_HUMAN	Proteasome subunit alpha type-6	2	2	1	2	2	2	2	1	2
PSA7_HUMAN	Proteasome subunit alpha type-7	1	0	1	2	2	0	0	1	1
PSMD2_HUMAN	26S proteasome non-ATPase regulatory subunit 2	1	2	1	2	2	0	1	0	1
PURA_HUMAN	Transcriptional activator protein Pur-alpha	0	0	0	2	7	4	1	1	5
RBM42_HUMAN	RNA-binding protein 42	1	1	0	2	3	4	2	1	5
RFA1_HUMAN	Replication protein A 70 kDa DNA-binding subunit	0	1	0	2	0	2	0	0	0
RFC1_HUMAN	Replication factor C subunit 1	0	0	0	2	2	0	1	1	2
RL26_HUMAN	60S ribosomal protein L26	0	0	0	2	4	5	1	0	5
RL26L_HUMAN	60S ribosomal protein L26-like 1	0	0	0	2	1	0	0	0	1
RL36_HUMAN	60S ribosomal protein L36	0	0	0	2	7	10	1	5	6
RL40_HUMAN	Ubiquitin-60S ribosomal protein L40	0	0	0	2	2	1	1	0	2
RLA1_HUMAN	60S acidic ribosomal protein P1	1	2	0	2	4	3	3	0	3
RM12_HUMAN	39S ribosomal protein L12, mitochondrial	1	0	0	2	5	2	1	1	2
RPAC1_HUMAN	DNA-directed RNA polymerases I and III subunit RPAC1	0	0	0	2	0	0	0	0	2
RS26_HUMAN	40S ribosomal protein S26	1	0	0	2	4	4	0	0	4
RS27L_HUMAN	40S ribosomal protein S27-like	0	0	0	2	5	4	2	1	3
RT29_HUMAN	28S ribosomal protein S29, mitochondrial	1	1	1	2	4	3	4	1	5
RTRAF_HUMAN	RNA transcription, translation and transport factor protein	0	1	0	2	10	5	0	0	0
RUVB2_HUMAN	RuvB-like 2	0	0	1	2	1	2	1	1	1
S10A7_HUMAN	Protein S100-A7	0	0	0	2	4	1	1	0	1
SERA_HUMAN	D-3-phosphoglycerate dehydrogenase	2	0	0	2	2	1	4	1	5
SPB1_HUMAN	pre-rRNA processing protein FTSJ3	0	0	0	2	1	2	2	0	3
SPB12_HUMAN	Serpin B12	2	1	1	2	4	0	2	1	0
SPF27_HUMAN	Pre-mRNA-splicing factor SPF27	0	0	0	2	3	2	0	0	1
SQSTM_HUMAN	Sequestosome-1	0	0	0	2	1	2	1	1	1
SRPK2_HUMAN	SRSF protein kinase 2	0	0	0	2	1	0	1	0	0
SRRM2_HUMAN	Serine/arginine repetitive matrix protein 2	0	0	0	2	0	0	1	1	1
SRSF6_HUMAN	Serine/arginine-rich splicing factor 6	0	0	0	2	2	2	2	1	2
SRSF7_HUMAN	Serine/arginine-rich splicing factor 7	0	0	0	2	1	1	1	0	1
SYFA_HUMAN	Phenylalanine--tRNA ligase alpha subunit	1	1	0	2	5	4	1	0	3
SYK_HUMAN	Lysine--tRNA ligase	0	1	0	2	4	5	3	3	1
SZRD1_HUMAN	SUZ domain-containing protein 1	0	1	0	2	2	1	1	1	2
TADBP_HUMAN	TAR DNA-binding protein 43	0	1	0	2	1	1	1	0	2
TBL2_HUMAN	Transducin beta-like protein 2	0	0	0	2	2	2	1	0	1
TCPQ_HUMAN	T-complex protein 1 subunit theta	2	3	2	2	5	4	3	2	2
TIM50_HUMAN	Mitochondrial import inner membrane translocase subunit TIM50	0	2	1	2	2	0	0	0	2
TTC37_HUMAN	Tetratricopeptide repeat protein 37	0	0	0	2	2	1	1	0	2
VAPB_HUMAN	Vesicle-associated membrane protein-associated protein B/C	0	0	0	2	3	0	0	0	0
VDAC1_HUMAN	Voltage-dependent anion-selective channel protein 1	0	1	0	2	4	2	0	1	1
VDAC2_HUMAN	Voltage-dependent anion-selective channel protein 2	1	0	0	2	1	1	0	0	1
XRN2_HUMAN	5'-3' exoribonuclease 2	0	1	0	2	4	0	1	0	4
YTHD2_HUMAN	YTH domain-containing family protein 2	1	2	1	2	4	2	1	1	1
ZN598_HUMAN	E3 ubiquitin-protein ligase ZNF598	0	0	0	2	6	4	0	0	2
1433B_HUMAN	14-3-3 protein beta/alpha	0	0	0	1	3	2	0	0	0
1433F_HUMAN	14-3-3 protein eta	0	0	0	1	1	0	0	0	0
1433G_HUMAN	14-3-3 protein gamma	0	0	0	1	1	1	1	1	0
1433T_HUMAN	14-3-3 protein theta	0	0	0	1	1	1	0	1	1
2AAA_HUMAN	Serine/threonine-protein phosphatase 2A 65 kDa regulatory subunit A alpha isoform	0	1	1	1	1	1	1	0	0
ABI1_HUMAN	Abl interactor 1	0	0	0	1	0	0	1	0	1
ACINU_HUMAN	Apoptotic chromatin condensation inducer in the nucleus	0	0	0	1	2	0	0	0	0
ACLY_HUMAN	ATP-citrate synthase	0	0	0	1	0	0	0	0	0
ACOT9_HUMAN	Acyl-coenzyme A thioesterase 9, mitochondrial	0	0	0	1	1	1	1	1	0
ADAM9_HUMAN	Disintegrin and metalloproteinase domain-containing protein 9	0	0	0	1	0	0	0	0	0
ADT2_HUMAN	ADP/ATP translocase 2	0	0	1	1	1	1	0	0	0
ADT3_HUMAN	ADP/ATP translocase 3	1	1	0	1	2	1	0	0	1
AF1L2_HUMAN	Actin filament-associated protein 1-like 2	0	0	0	1	0	0	0	0	0
AFG32_HUMAN	AFG3-like protein 2	0	0	0	1	0	0	0	0	0
AIFM1_HUMAN	Apoptosis-inducing factor 1, mitochondrial	3	3	2	1	2	2	0	1	1
AIMP1_HUMAN	Aminoacyl tRNA synthase complex-interacting multifunctional protein 1	0	0	0	1	6	1	2	1	4
AIMP2_HUMAN	Aminoacyl tRNA synthase complex-interacting multifunctional protein 2	0	1	0	1	3	3	1	1	1
AKP13_HUMAN	A-kinase anchor protein 13	2	0	0	1	1	2	0	3	2
AN30A_HUMAN	Ankyrin repeat domain-containing protein 30A	0	0	0	1	0	0	0	0	0
ARHG2_HUMAN	Rho guanine nucleotide exchange factor 2	0	0	0	1	1	1	0	0	0
AROS_HUMAN	Active regulator of SIRT1	0	0	0	1	0	0	0	1	1
ASCC1_HUMAN	Activating signal cointegrator 1 complex subunit 1	0	0	0	1	2	3	0	0	1
ASPP1_HUMAN	Apoptosis-stimulating of p53 protein 1	0	0	0	1	1	0	0	0	0
AT1A1_HUMAN	Sodium/potassium-transporting ATPase subunit alpha-1	0	0	0	1	0	0	1	1	0
ATD3A_HUMAN	ATPase family AAA domain-containing protein 3A	0	0	0	1	2	1	0	0	1
ATPO_HUMAN	ATP synthase subunit O, mitochondrial	1	0	0	1	1	3	0	0	1
ATX2_HUMAN	Ataxin-2	0	0	0	1	3	2	1	0	2
BLMH_HUMAN	Bleomycin hydrolase	1	0	0	1	2	1	0	0	1
BPIB1_HUMAN	BPI fold-containing family B member 1	0	0	0	1	1	0	0	0	0
C1TC_HUMAN	C-1-tetrahydrofolate synthase, cytoplasmic	0	0	0	1	1	2	2	0	3
C2C2L_HUMAN	Phospholipid transfer protein C2CD2L	0	0	0	1	0	0	0	0	0
CABIN_HUMAN	Calcineurin-binding protein cabin-1	0	0	0	1	0	0	0	0	0
CAC1A_HUMAN	Voltage-dependent P/Q-type calcium channel subunit alpha-1A	0	0	0	1	0	0	0	0	0
CATG_HUMAN	Cathepsin G	0	0	0	1	2	0	0	0	0
CAVN3_HUMAN	Caveolae-associated protein 3	0	0	0	1	0	0	0	0	0
CB016_HUMAN	Uncharacterized protein C2orf16	0	0	0	1	0	0	0	0	0
CBARP_HUMAN	Voltage-dependent calcium channel beta subunit-associated regulatory protein	0	0	0	1	0	0	0	0	0
CCNE1_HUMAN	G1/S-specific cyclin-E1	0	0	0	1	0	0	0	0	0
CG050_HUMAN	Uncharacterized protein C7orf50	0	0	0	1	2	0	0	0	0
CHIP_HUMAN	E3 ubiquitin-protein ligase CHIP	2	2	0	1	1	1	0	0	0
CK098_HUMAN	Uncharacterized protein C11orf98	0	0	0	1	2	2	1	1	2
CNBP_HUMAN	Cellular nucleic acid-binding protein	0	0	0	1	0	0	0	0	0
COX20_HUMAN	Cytochrome c oxidase assembly protein COX20, mitochondrial	0	0	0	1	0	0	0	0	0
CSDE1_HUMAN	Cold shock domain-containing protein E1	0	0	0	1	1	0	0	0	0
CSK2B_HUMAN	Casein kinase II subunit beta	0	0	0	1	0	0	0	0	0
CYTA_HUMAN	Cystatin-A	2	3	0	1	3	2	1	2	0
DBF4B_HUMAN	Protein DBF4 homolog B	1	0	0	1	0	0	1	0	0
DCTN2_HUMAN	Dynactin subunit 2	0	0	0	1	0	0	0	0	0
DDRGK_HUMAN	DDRGK domain-containing protein 1	0	0	0	1	0	0	0	1	0
DDX3X_HUMAN	ATP-dependent RNA helicase DDX3X	0	0	0	1	1	0	1	0	2
DDX50_HUMAN	ATP-dependent RNA helicase DDX50	0	0	0	1	4	2	0	0	3
DDX52_HUMAN	Probable ATP-dependent RNA helicase DDX52	0	0	0	1	1	0	0	0	0
DDX54_HUMAN	ATP-dependent RNA helicase DDX54	0	0	0	1	1	0	1	1	0
DDX55_HUMAN	ATP-dependent RNA helicase DDX55	0	0	0	1	1	1	1	0	1
DDX56_HUMAN	Probable ATP-dependent RNA helicase DDX56	0	0	0	1	4	1	3	0	3
DHX57_HUMAN	Putative ATP-dependent RNA helicase DHX57	0	0	0	1	5	1	0	0	2
DIC_HUMAN	Mitochondrial dicarboxylate carrier	0	0	0	1	1	0	0	0	0
DNJA1_HUMAN	DnaJ homolog subfamily A member 1	0	0	0	1	0	0	0	0	0
DNJB1_HUMAN	DnaJ homolog subfamily B member 1	0	0	0	1	0	0	0	0	0
DRG1_HUMAN	Developmentally-regulated GTP-binding protein 1	0	0	0	1	1	1	1	0	0
ECH1_HUMAN	Delta(3,5)-Delta(2,4)-dienoyl-CoA isomerase, mitochondrial	0	0	1	1	1	1	1	1	1
ECM1_HUMAN	Extracellular matrix protein 1	0	0	1	1	1	0	0	0	1
EF1B_HUMAN	Elongation factor 1-beta	1	0	0	1	2	2	0	0	1
EI2BD_HUMAN	Translation initiation factor eIF-2B subunit delta	0	0	0	1	3	2	1	0	2
EI2BG_HUMAN	Translation initiation factor eIF-2B subunit gamma	0	0	0	1	4	1	1	0	2
ELAV2_HUMAN	ELAV-like protein 2	0	0	0	1	0	0	0	0	0
ENTK_HUMAN	Enteropeptidase	0	0	0	1	1	0	0	0	0
EPHA8_HUMAN	Ephrin type-A receptor 8	1	1	2	1	0	0	1	1	0
EPHB6_HUMAN	Ephrin type-B receptor 6	0	0	0	1	1	1	1	1	1
ESYT1_HUMAN	Extended synaptotagmin-1	0	0	0	1	1	0	1	0	1
EWS_HUMAN	RNA-binding protein EWS	0	0	0	1	1	1	1	0	0
EXOSX_HUMAN	Exosome component 10	0	0	0	1	3	4	3	0	1
F120A_HUMAN	Constitutive coactivator of PPAR-gamma-like protein 1	0	0	0	1	1	1	0	0	0
FGD4_HUMAN	FYVE, RhoGEF and PH domain-containing protein 4	0	0	0	1	2	2	0	0	0
FIBB_HUMAN	Fibrinogen beta chain	0	0	0	1	0	0	0	0	0
FILA_HUMAN	Filaggrin	0	0	0	1	1	0	0	0	0
FLNB_HUMAN	Filamin-B	0	1	1	1	0	0	0	1	1
FUBP2_HUMAN	Far upstream element-binding protein 2	2	3	1	1	1	2	1	0	0
FUS_HUMAN	RNA-binding protein FUS	0	1	0	1	3	1	0	0	0
GBB1_HUMAN	Guanine nucleotide-binding protein G(I)/G(S)/G(T) subunit beta-1	0	0	0	1	0	0	0	0	0
GBP6_HUMAN	Guanylate-binding protein 6	0	1	1	1	0	0	0	0	0
GDE_HUMAN	Glycogen debranching enzyme	2	0	1	1	3	1	4	1	2
GOLP3_HUMAN	Golgi phosphoprotein 3	0	0	0	1	0	1	0	0	0
GPTC4_HUMAN	G patch domain-containing protein 4	0	0	0	1	5	3	1	1	0
GSTP1_HUMAN	Glutathione S-transferase P	0	0	0	1	2	0	0	0	0
GTSE1_HUMAN	G2 and S phase-expressed protein 1	0	0	0	1	0	0	0	1	0
GYS1_HUMAN	Glycogen [starch] synthase, muscle	0	0	1	1	1	0	1	1	1
H31_HUMAN	Histone H3.1	0	0	0	1	0	0	1	0	0
HBB_HUMAN	Hemoglobin subunit beta	0	0	0	1	0	0	0	0	0
HMX3_HUMAN	Homeobox protein HMX3	0	1	0	1	1	1	0	0	1
HNRPR_HUMAN	Heterogeneous nuclear ribonucleoprotein R	0	0	0	1	5	3	1	0	6
HS105_HUMAN	Heat shock protein 105 kDa	0	0	1	1	1	0	1	0	1
HS2ST_HUMAN	Heparan sulfate 2-O-sulfotransferase 1	1	1	0	1	1	0	0	0	1
HS71L_HUMAN	Heat shock 70 kDa protein 1-like	0	0	0	1	0	0	0	0	1
HSP72_HUMAN	Heat shock-related 70 kDa protein 2	0	2	0	1	0	0	1	0	1
HUWE1_HUMAN	E3 ubiquitin-protein ligase HUWE1	16	22	5	1	0	0	3	1	1
ICLN_HUMAN	Methylosome subunit pICln	0	0	0	1	1	1	0	1	1
IDE_HUMAN	Insulin-degrading enzyme	0	0	0	1	0	0	0	0	0
IF2B2_HUMAN	Insulin-like growth factor 2 mRNA-binding protein 2	0	0	0	1	2	1	0	0	2
IF4A3_HUMAN	Eukaryotic initiation factor 4A-III	0	0	0	1	0	0	0	0	1
IF4G3_HUMAN	Eukaryotic translation initiation factor 4 gamma 3	0	0	0	1	1	0	0	0	0
IGHG1_HUMAN	Immunoglobulin heavy constant gamma 1	1	1	1	1	3	0	1	0	1
IGJ_HUMAN	Immunoglobulin J chain	1	1	1	1	1	1	1	1	1
IMA4_HUMAN	Importin subunit alpha-4	0	0	0	1	0	0	0	0	0
K1210_HUMAN	Acrosomal protein KIAA1210	0	0	0	1	0	0	0	0	0
K2C6A_HUMAN	Keratin, type II cytoskeletal 6A	1	0	0	1	2	1	1	1	0
K2C74_HUMAN	Keratin, type II cytoskeletal 74	1	0	0	1	0	0	0	0	1
K2C8_HUMAN	Keratin, type II cytoskeletal 8	1	1	0	1	1	2	0	0	0
K2C80_HUMAN	Keratin, type II cytoskeletal 80	1	0	2	1	0	2	2	3	0
KAD2_HUMAN	Adenylate kinase 2, mitochondrial	1	1	0	1	0	0	0	0	0
KALM_HUMAN	Anosmin-1	0	0	0	1	0	0	0	0	0
KBP_HUMAN	KIF1-binding protein	0	0	0	1	0	0	0	0	0
KC1A_HUMAN	Casein kinase I isoform alpha	1	1	1	1	1	0	0	0	0
KC1G1_HUMAN	Casein kinase I isoform gamma-1	0	0	0	1	0	0	0	0	0
KCRB_HUMAN	Creatine kinase B-type	0	1	0	1	1	3	2	2	2
KRI1_HUMAN	Protein KRI1 homolog	0	0	0	1	2	0	0	0	0
KY_HUMAN	Kyphoscoliosis peptidase	0	0	0	1	0	0	0	0	0
L10K_HUMAN	Leydig cell tumor 10 kDa protein homolog	0	0	0	1	0	1	0	0	1
LA_HUMAN	Lupus La protein	0	0	0	1	7	7	1	0	4
LAMP1_HUMAN	Lysosome-associated membrane glycoprotein 1	0	0	0	1	1	0	0	0	0
LBR_HUMAN	Lamin-B receptor	0	0	0	1	4	1	1	0	0
LIPT_HUMAN	Lipoyltransferase 1, mitochondrial	0	0	0	1	1	0	1	1	0
LPPRC_HUMAN	Leucine-rich PPR motif-containing protein, mitochondrial	0	0	0	1	1	0	0	0	0
LX12B_HUMAN	Arachidonate 12-lipoxygenase, 12R-type	1	0	0	1	0	0	0	0	0
M10L1_HUMAN	RNA helicase Mov10l1	0	0	0	1	0	0	1	1	1
MAP7_HUMAN	Ensconsin	0	0	0	1	3	0	0	0	1
MIF_HUMAN	Macrophage migration inhibitory factor	0	1	1	1	0	2	1	2	1
MOGS_HUMAN	Mannosyl-oligosaccharide glucosidase	0	0	0	1	2	1	0	0	0
MRM3_HUMAN	rRNA methyltransferase 3, mitochondrial	0	0	0	1	2	0	0	0	0
MSH4_HUMAN	MutS protein homolog 4	0	0	0	1	0	0	0	0	0
MTMR5_HUMAN	Myotubularin-related protein 5	0	0	0	1	1	0	0	0	0
MTREX_HUMAN	Exosome RNA helicase MTR4	0	0	0	1	2	1	1	0	2
MYH10_HUMAN	Myosin-10	0	0	0	1	0	0	0	0	2
MYL6_HUMAN	Myosin light polypeptide 6	0	0	0	1	1	1	0	0	0
MYO1D_HUMAN	Unconventional myosin-Id	0	0	0	1	0	0	0	0	0
MYO9A_HUMAN	Unconventional myosin-IXa	0	0	0	1	0	0	0	0	0
NAR4_HUMAN	Ecto-ADP-ribosyltransferase 4	0	0	0	1	2	1	0	0	0
NAT10_HUMAN	RNA cytidine acetyltransferase	0	0	0	1	2	1	0	0	1
NEBU_HUMAN	Nebulin	0	0	0	1	0	0	0	0	0
NGAL_HUMAN	Neutrophil gelatinase-associated lipocalin	0	0	0	1	3	0	1	0	0
NKRF_HUMAN	NF-kappa-B-repressing factor	0	0	0	1	1	0	1	0	0
NONO_HUMAN	Non-POU domain-containing octamer-binding protein	0	0	0	1	1	0	0	0	1
NP1L1_HUMAN	Nucleosome assembly protein 1-like 1	0	0	0	1	3	1	2	1	2
NPM3_HUMAN	Nucleoplasmin-3	0	0	0	1	1	0	0	0	1
NPRL2_HUMAN	GATOR complex protein NPRL2	0	0	0	1	0	0	0	0	0
NUP50_HUMAN	Nuclear pore complex protein Nup50	0	0	0	1	0	0	1	0	0
NWD2_HUMAN	NACHT and WD repeat domain-containing protein 2	0	0	0	1	1	0	0	0	0
ODPAT_HUMAN	Pyruvate dehydrogenase E1 component subunit alpha, testis-specific form, mitochondrial	0	0	0	1	0	0	0	0	0
OR2A4_HUMAN	Olfactory receptor 2A4	0	0	0	1	0	0	0	0	0
OR2Z1_HUMAN	Olfactory receptor 2Z1	0	0	0	1	0	0	0	0	0
OSCP1_HUMAN	Protein OSCP1	0	0	0	1	0	0	0	0	0
OST48_HUMAN	Dolichyl-diphosphooligosaccharide--protein glycosyltransferase 48 kDa subunit	0	0	0	1	2	2	1	0	1
P53_HUMAN	Cellular tumor antigen p53	0	0	0	1	2	3	0	0	0
PADC1_HUMAN	Protease-associated domain-containing protein 1	1	2	1	1	1	1	1	1	1
PAXX_HUMAN	Protein PAXX	0	0	0	1	0	0	0	0	0
PCBP1_HUMAN	Poly(rC)-binding protein 1	1	1	0	1	1	1	1	2	2
PCBP2_HUMAN	Poly(rC)-binding protein 2	1	1	0	1	2	0	1	0	0
PCNA_HUMAN	Proliferating cell nuclear antigen	0	0	0	1	0	2	0	0	0
PDIA1_HUMAN	Protein disulfide-isomerase	0	0	0	1	0	2	1	1	0
PERM_HUMAN	Myeloperoxidase	0	0	0	1	3	0	0	0	0
PHB2_HUMAN	Prohibitin-2	0	0	0	1	5	0	2	0	4
PHF6_HUMAN	PHD finger protein 6	0	0	0	1	3	0	0	0	1
PKHA5_HUMAN	Pleckstrin homology domain-containing family A member 5	0	0	0	1	1	0	0	0	0
PKHA6_HUMAN	Pleckstrin homology domain-containing family A member 6	0	0	0	1	0	0	0	0	0
POP1_HUMAN	Ribonucleases P/MRP protein subunit POP1	0	0	0	1	0	1	0	0	1
PP1G_HUMAN	Serine/threonine-protein phosphatase PP1-gamma catalytic subunit	0	0	0	1	0	0	0	0	0
PPP6_HUMAN	Serine/threonine-protein phosphatase 6 catalytic subunit	0	0	0	1	0	0	0	0	0
PRDX4_HUMAN	Peroxiredoxin-4	0	1	0	1	3	1	1	0	0
PRKRA_HUMAN	Interferon-inducible double-stranded RNA-dependent protein kinase activator A	0	0	0	1	2	1	0	1	1
PRS10_HUMAN	26S proteasome regulatory subunit 10B	2	0	0	1	0	1	2	1	1
PRS4_HUMAN	26S proteasome regulatory subunit 4	0	2	0	1	1	0	0	0	1
PRS6B_HUMAN	26S proteasome regulatory subunit 6B	0	2	0	1	0	1	2	0	3
PSA2_HUMAN	Proteasome subunit alpha type-2	1	2	1	1	2	1	0	0	2
PSA4_HUMAN	Proteasome subunit alpha type-4	0	2	1	1	0	1	1	0	1
PSA5_HUMAN	Proteasome subunit alpha type-5	2	1	2	1	3	1	1	0	1
PSB1_HUMAN	Proteasome subunit beta type-1	2	0	0	1	2	2	1	0	3
PSB2_HUMAN	Proteasome subunit beta type-2	0	1	1	1	1	1	1	1	1
PSB6_HUMAN	Proteasome subunit beta type-6	3	3	0	1	1	2	1	1	1
PSD11_HUMAN	26S proteasome non-ATPase regulatory subunit 11	0	0	0	1	1	1	0	0	1
PSMD1_HUMAN	26S proteasome non-ATPase regulatory subunit 1	1	1	0	1	1	1	2	1	2
PSMD4_HUMAN	26S proteasome non-ATPase regulatory subunit 4	1	1	1	1	0	2	2	0	2
PSMD6_HUMAN	26S proteasome non-ATPase regulatory subunit 6	0	0	0	1	0	0	1	1	1
PSMD7_HUMAN	26S proteasome non-ATPase regulatory subunit 7	0	0	0	1	1	1	0	0	1
PURB_HUMAN	Transcriptional activator protein Pur-beta	0	0	0	1	1	2	0	0	1
PWP1_HUMAN	Periodic tryptophan protein 1 homolog	0	0	0	1	0	0	0	0	1
QCR2_HUMAN	Cytochrome b-c1 complex subunit 2, mitochondrial	0	0	0	1	1	1	0	1	1
RAB7A_HUMAN	Ras-related protein Rab-7a	0	0	0	1	1	1	2	0	0
RAD18_HUMAN	E3 ubiquitin-protein ligase RAD18	0	0	0	1	1	1	0	0	1
RASD1_HUMAN	Dexamethasone-induced Ras-related protein 1	0	0	0	1	0	0	0	0	0
RBM28_HUMAN	RNA-binding protein 28	0	0	0	1	1	0	0	0	2
RBM39_HUMAN	RNA-binding protein 39	0	0	0	1	2	2	1	0	4
RBM4B_HUMAN	RNA-binding protein 4B	0	0	0	1	1	2	0	0	1
RBMS1_HUMAN	RNA-binding motif, single-stranded-interacting protein 1	0	0	0	1	1	0	0	0	0
RELB_HUMAN	Transcription factor RelB	0	0	0	1	0	0	0	0	0
RENT1_HUMAN	Regulator of nonsense transcripts 1	0	0	0	1	3	1	0	0	1
RFC2_HUMAN	Replication factor C subunit 2	0	0	0	1	0	1	0	0	0
RIC8A_HUMAN	Synembryn-A	0	0	0	1	0	0	0	0	0
RL36L_HUMAN	60S ribosomal protein L36a-like	0	0	0	1	2	0	0	1	0
RL39_HUMAN	60S ribosomal protein L39	0	0	0	1	0	0	0	0	0
RM11_HUMAN	39S ribosomal protein L11, mitochondrial	0	0	0	1	0	1	0	0	2
RM15_HUMAN	39S ribosomal protein L15, mitochondrial	0	0	0	1	2	0	0	0	0
RM17_HUMAN	39S ribosomal protein L17, mitochondrial	0	0	0	1	0	0	0	0	1
RM23_HUMAN	39S ribosomal protein L23, mitochondrial	0	0	0	1	2	1	2	0	2
RM41_HUMAN	39S ribosomal protein L41, mitochondrial	0	1	0	1	0	1	1	0	1
RM46_HUMAN	39S ribosomal protein L46, mitochondrial	0	0	0	1	0	0	0	0	0
RO60_HUMAN	60 kDa SS-A/Ro ribonucleoprotein	0	0	0	1	0	0	1	0	1
RPN2_HUMAN	Dolichyl-diphosphooligosaccharide--protein glycosyltransferase subunit 2	0	0	0	1	0	0	0	0	0
RRP15_HUMAN	RRP15-like protein	0	0	0	1	1	0	0	0	1
RRP7A_HUMAN	Ribosomal RNA-processing protein 7 homolog A	0	0	0	1	3	5	0	0	2
RSBNL_HUMAN	Round spermatid basic protein 1-like protein	0	0	0	1	0	0	1	0	1
RT12_HUMAN	28S ribosomal protein S12, mitochondrial	1	0	1	1	0	0	0	0	1
RT18B_HUMAN	28S ribosomal protein S18b, mitochondrial	0	0	0	1	0	0	0	0	1
RT23_HUMAN	28S ribosomal protein S23, mitochondrial	0	0	0	1	2	2	0	0	1
RT27_HUMAN	28S ribosomal protein S27, mitochondrial	0	0	0	1	2	0	0	0	0
RT36_HUMAN	28S ribosomal protein S36, mitochondrial	0	0	0	1	0	24	2	1	0
RUVB1_HUMAN	RuvB-like 1	0	0	0	1	2	3	1	1	2
RUXE_HUMAN	Small nuclear ribonucleoprotein E	0	0	0	1	0	1	1	0	0
SBSN_HUMAN	Suprabasin	0	0	0	1	0	1	1	0	0
SCO1_HUMAN	Protein SCO1 homolog, mitochondrial	1	1	0	1	0	1	0	0	0
SCO2_HUMAN	Protein SCO2 homolog, mitochondrial	0	1	0	1	5	1	1	0	3
SDHB_HUMAN	Succinate dehydrogenase [ubiquinone] iron-sulfur subunit, mitochondrial	0	0	0	1	1	0	0	0	0
SEC13_HUMAN	Protein SEC13 homolog	4	4	2	1	1	1	2	2	2
SF3A1_HUMAN	Splicing factor 3A subunit 1	1	0	0	1	0	2	0	0	0
SF3B3_HUMAN	Splicing factor 3B subunit 3	0	0	0	1	0	0	0	1	0
SG1D2_HUMAN	Secretoglobin family 1D member 2	0	1	0	1	0	0	0	0	0
SGPL1_HUMAN	Sphingosine-1-phosphate lyase 1	0	0	0	1	0	1	0	0	0
SLPI_HUMAN	Antileukoproteinase	0	1	3	1	1	0	1	0	0
SMD3_HUMAN	Small nuclear ribonucleoprotein Sm D3	0	0	0	1	3	2	0	0	2
SNUT2_HUMAN	U4/U6.U5 tri-snRNP-associated protein 2	0	0	0	1	0	0	0	0	0
SPB3_HUMAN	Serpin B3	5	1	1	1	5	1	2	1	1
SPRTN_HUMAN	SprT-like domain-containing protein Spartan	0	0	0	1	0	0	0	0	1
SRP54_HUMAN	Signal recognition particle 54 kDa protein	0	0	0	1	2	1	0	0	1
SRP68_HUMAN	Signal recognition particle subunit SRP68	0	0	0	1	3	3	1	0	4
SRP72_HUMAN	Signal recognition particle subunit SRP72	0	0	0	1	2	0	0	0	0
SRPRA_HUMAN	Signal recognition particle receptor subunit alpha	0	0	0	1	1	0	0	1	2
SRPRB_HUMAN	Signal recognition particle receptor subunit beta	0	0	0	1	4	2	1	0	4
SSA27_HUMAN	Sjoegren syndrome/scleroderma autoantigen 1	0	0	0	1	0	0	0	0	1
SSRD_HUMAN	Translocon-associated protein subunit delta	0	0	0	1	2	0	1	0	1
STK10_HUMAN	Serine/threonine-protein kinase 10	0	0	0	1	1	0	0	0	0
STML2_HUMAN	Stomatin-like protein 2, mitochondrial	0	0	0	1	1	1	0	0	2
STRAP_HUMAN	Serine-threonine kinase receptor-associated protein	1	1	1	1	0	1	2	2	1
SYLC_HUMAN	Leucine--tRNA ligase, cytoplasmic	1	0	1	1	3	1	2	0	1
T183A_HUMAN	Transmembrane protein 183A	0	0	0	1	1	0	0	0	0
TBB4B_HUMAN	Tubulin beta-4B chain	1	1	1	1	1	1	1	0	1
TBL3_HUMAN	Transducin beta-like protein 3	0	0	0	1	1	0	0	0	1
TCOF_HUMAN	Treacle protein	1	1	1	1	3	1	1	1	2
TCPH_HUMAN	T-complex protein 1 subunit eta	4	2	2	1	2	3	2	0	2
TCPZ_HUMAN	T-complex protein 1 subunit zeta	0	1	0	1	2	2	1	1	1
TENA_HUMAN	Tenascin	1	0	0	1	0	0	0	0	0
TFAM_HUMAN	Transcription factor A, mitochondrial	0	0	0	1	0	1	0	1	1
TGM1_HUMAN	Protein-glutamine gamma-glutamyltransferase K	2	2	1	1	1	0	1	0	1
TIM13_HUMAN	Mitochondrial import inner membrane translocase subunit Tim13	1	1	1	1	0	0	1	1	0
TMED9_HUMAN	Transmembrane emp24 domain-containing protein 9	0	0	0	1	0	0	0	0	0
TOR4A_HUMAN	Torsin-4A	0	0	0	1	0	0	0	0	0
TRM2A_HUMAN	tRNA (uracil-5-)-methyltransferase homolog A	0	0	0	1	3	1	0	0	2
TSYL1_HUMAN	Testis-specific Y-encoded-like protein 1	0	0	0	1	1	1	1	0	1
UBR4_HUMAN	E3 ubiquitin-protein ligase UBR4	0	1	0	1	0	0	0	0	1
UTP18_HUMAN	U3 small nucleolar RNA-associated protein 18 homolog	0	0	0	1	1	0	0	0	0
VAMP8_HUMAN	Vesicle-associated membrane protein 8	0	0	0	1	0	0	0	0	0
VAT1_HUMAN	Synaptic vesicle membrane protein VAT-1 homolog	1	1	1	1	1	0	1	1	1
WDR5_HUMAN	WD repeat-containing protein 5	0	0	0	1	2	0	0	0	0
WDR54_HUMAN	WD repeat-containing protein 54	0	0	0	1	0	0	0	0	0
XP32_HUMAN	Skin-specific protein 32	2	1	1	1	1	2	1	2	1
YTHD1_HUMAN	YTH domain-containing family protein 1	0	0	0	1	1	0	0	0	0
ZCHC3_HUMAN	Zinc finger CCHC domain-containing protein 3	0	0	0	1	1	2	0	0	0
ZFR_HUMAN	Zinc finger RNA-binding protein	0	0	0	1	3	0	1	0	2
ZN326_HUMAN	DBIRD complex subunit ZNF326	0	0	0	1	0	0	0	0	0
ZN672_HUMAN	Zinc finger protein 672	0	0	1	1	1	0	2	0	1
ZN761_HUMAN	Zinc finger protein 761	0	0	0	1	0	0	0	0	0
ZN770_HUMAN	Zinc finger protein 770	0	0	0	1	0	1	0	0	0
ZN771_HUMAN	Zinc finger protein 771	0	0	0	1	0	1	0	0	0
A2ML1_HUMAN	Alpha-2-macroglobulin-like protein 1	0	0	0	0	3	0	0	0	0
AAAT_HUMAN	Neutral amino acid transporter B(0)	1	0	0	0	1	0	0	0	2
ABCF1_HUMAN	ATP-binding cassette sub-family F member 1	0	0	0	0	2	0	0	0	0
ABCF2_HUMAN	ATP-binding cassette sub-family F member 2	0	0	0	0	1	0	0	0	1
ABCF3_HUMAN	ATP-binding cassette sub-family F member 3	0	0	0	0	0	1	0	0	0
ABRX2_HUMAN	BRISC complex subunit Abraxas 2	1	2	1	0	0	0	1	1	0
ACACB_HUMAN	Acetyl-CoA carboxylase 2	0	0	0	0	0	1	0	0	0
ACADV_HUMAN	Very long-chain specific acyl-CoA dehydrogenase, mitochondrial	0	0	0	0	0	0	1	0	1
ACOX3_HUMAN	Peroxisomal acyl-coenzyme A oxidase 3	0	0	0	0	1	0	0	0	0
ACSL4_HUMAN	Long-chain-fatty-acid--CoA ligase 4	0	0	1	0	0	0	0	0	0
ACSS3_HUMAN	Acyl-CoA synthetase short-chain family member 3, mitochondrial	0	0	0	0	1	0	0	0	0
ACTN4_HUMAN	Alpha-actinin-4	0	1	0	0	0	0	0	0	0
ADRM1_HUMAN	Proteasomal ubiquitin receptor ADRM1	0	0	0	0	0	0	0	1	2
AFAM_HUMAN	Afamin	1	0	0	0	0	1	0	1	1
AFF3_HUMAN	AF4/FMR2 family member 3	0	0	0	0	0	1	0	0	0
AIDA_HUMAN	Axin interactor, dorsalization-associated protein	1	1	0	0	0	1	0	0	1
ALDOA_HUMAN	Fructose-bisphosphate aldolase A	0	0	0	0	1	2	0	1	0
AN33B_HUMAN	Ankyrin repeat domain-containing protein 33B	0	0	0	0	0	1	0	0	0
ANK3_HUMAN	Ankyrin-3	0	0	0	0	0	0	0	1	0
ANM1_HUMAN	Protein arginine N-methyltransferase 1	0	0	0	0	1	0	0	0	0
ANO2_HUMAN	Anoctamin-2	0	0	0	0	0	1	0	0	2
ANR35_HUMAN	Ankyrin repeat domain-containing protein 35	0	0	0	0	0	1	0	0	0
ANXA3_HUMAN	Annexin A3	0	0	0	0	1	0	0	0	0
AP2D_HUMAN	Transcription factor AP-2-delta	1	0	0	0	0	0	0	1	1
AP2M1_HUMAN	AP-2 complex subunit mu	0	0	0	0	1	0	1	0	1
APMAP_HUMAN	Adipocyte plasma membrane-associated protein	0	0	0	0	1	0	0	0	0
ARHG9_HUMAN	Rho guanine nucleotide exchange factor 9	0	0	0	0	1	0	0	0	0
ARHGH_HUMAN	Rho guanine nucleotide exchange factor 17	0	2	0	0	0	0	0	0	0
ASPH_HUMAN	Aspartyl/asparaginyl beta-hydroxylase	0	0	0	0	2	0	0	0	0
AT2A2_HUMAN	Sarcoplasmic/endoplasmic reticulum calcium ATPase 2	0	0	0	0	2	2	0	0	2
AT2B4_HUMAN	Plasma membrane calcium-transporting ATPase 4	0	0	1	0	0	0	0	0	0
AT5F1_HUMAN	ATP synthase F(0) complex subunit B1, mitochondrial	0	0	0	0	1	0	0	0	0
ATOH1_HUMAN	Protein atonal homolog 1	0	0	1	0	0	0	0	0	0
ATP5I_HUMAN	ATP synthase subunit e, mitochondrial	1	0	0	0	0	0	1	1	0
ATPG_HUMAN	ATP synthase subunit gamma, mitochondrial	0	0	0	0	1	0	0	0	0
B3GT6_HUMAN	Beta-1,3-galactosyltransferase 6	0	0	0	0	1	0	0	0	0
BAG2_HUMAN	BAG family molecular chaperone regulator 2	0	0	0	0	0	0	0	1	1
BAP31_HUMAN	B-cell receptor-associated protein 31	0	0	0	0	1	2	0	0	1
BD1L1_HUMAN	Biorientation of chromosomes in cell division protein 1-like 1	0	0	0	0	2	0	0	0	0
BICL2_HUMAN	BICD family-like cargo adapter 2	0	2	0	0	0	0	0	0	0
BIRC1_HUMAN	Baculoviral IAP repeat-containing protein 1	0	0	0	0	1	0	0	0	0
BRCA2_HUMAN	Breast cancer type 2 susceptibility protein	0	1	0	0	0	0	0	0	0
BZW2_HUMAN	Basic leucine zipper and W2 domain-containing protein 2	0	0	0	0	1	0	0	0	0
C2AIL_HUMAN	CDKN2AIP N-terminal-like protein	0	0	0	0	0	1	0	0	0
CALL3_HUMAN	Calmodulin-like protein 3	1	0	0	0	0	0	0	0	0
CAN3_HUMAN	Calpain-3	0	0	0	0	1	0	0	0	0
CAP7_HUMAN	Azurocidin	0	0	0	0	2	0	0	0	0
CAPZB_HUMAN	F-actin-capping protein subunit beta	1	0	0	0	0	0	0	0	1
CARF_HUMAN	CDKN2A-interacting protein	0	0	0	0	0	1	0	0	0
CATB_HUMAN	Cathepsin B	0	0	0	0	1	0	1	0	0
CAVN1_HUMAN	Caveolae-associated protein 1	0	0	0	0	0	1	0	0	0
CBPA4_HUMAN	Carboxypeptidase A4	0	0	0	0	0	0	0	0	1
CCD86_HUMAN	Coiled-coil domain-containing protein 86	0	0	0	0	1	0	0	0	0
CCNE2_HUMAN	G1/S-specific cyclin-E2	0	1	0	0	0	0	0	0	0
CD20B_HUMAN	Cell division cycle protein 20 homolog B	0	0	0	0	2	0	0	0	0
CD44_HUMAN	CD44 antigen	0	0	0	0	0	0	0	1	0
CDCP1_HUMAN	CUB domain-containing protein 1	0	0	0	0	0	0	1	0	0
CDSN_HUMAN	Corneodesmosin	0	0	0	0	0	0	1	0	0
CE350_HUMAN	Centrosome-associated protein 350	0	0	0	0	0	0	1	0	0
CEP78_HUMAN	Centrosomal protein of 78 kDa	0	0	0	0	0	0	1	0	0
CF201_HUMAN	Uncharacterized protein C6orf201	1	0	0	0	0	0	0	0	0
CFA44_HUMAN	Cilia- and flagella-associated protein 44	0	0	0	0	0	1	0	0	0
CHD5_HUMAN	Chromodomain-helicase-DNA-binding protein 5	0	0	0	0	0	1	0	1	0
CHP2_HUMAN	Calcineurin B homologous protein 2	0	0	0	0	0	0	1	0	0
CIKS_HUMAN	Adapter protein CIKS	0	0	0	0	0	1	0	0	0
CLCB_HUMAN	Clathrin light chain B	0	0	0	0	0	1	1	1	1
CLPP_HUMAN	ATP-dependent Clp protease proteolytic subunit, mitochondrial	1	0	0	0	0	0	0	0	0
CLPX_HUMAN	ATP-dependent Clp protease ATP-binding subunit clpX-like, mitochondrial	0	1	0	0	0	0	0	0	0
CNGA1_HUMAN	cGMP-gated cation channel alpha-1	0	0	0	0	1	0	0	0	0
CNOT3_HUMAN	CCR4-NOT transcription complex subunit 3	0	0	2	0	0	0	0	0	0
CO7_HUMAN	Complement component C7	0	0	0	0	1	0	0	0	0
COF1_HUMAN	Cofilin-1	0	1	0	0	1	0	1	0	0
COPA_HUMAN	Coatomer subunit alpha	0	0	0	0	0	0	1	0	0
COPB_HUMAN	Coatomer subunit beta	0	0	0	0	0	0	0	0	1
COPB2_HUMAN	Coatomer subunit beta'	0	0	0	0	1	0	0	0	0
COX2_HUMAN	Cytochrome c oxidase subunit 2	0	0	0	0	0	0	0	0	1
COX41_HUMAN	Cytochrome c oxidase subunit 4 isoform 1, mitochondrial	0	0	0	0	1	0	0	0	0
COX5B_HUMAN	Cytochrome c oxidase subunit 5B, mitochondrial	0	0	0	0	2	0	0	0	2
CPZIP_HUMAN	CapZ-interacting protein	0	0	0	0	0	0	0	0	1
CSMT1_HUMAN	Protein CCSMST1	0	0	0	0	0	0	0	1	0
CSN3_HUMAN	COP9 signalosome complex subunit 3	2	3	1	0	0	0	0	1	0
CTR3_HUMAN	Cationic amino acid transporter 3	0	1	0	0	0	0	0	0	0
CUL9_HUMAN	Cullin-9	0	0	0	0	1	0	0	0	0
CX067_HUMAN	Uncharacterized protein CXorf67	4	1	0	0	0	0	0	0	0
CYBP_HUMAN	Calcyclin-binding protein	0	0	0	0	0	0	0	1	0
CYFP1_HUMAN	Cytoplasmic FMR1-interacting protein 1	0	0	0	0	0	0	1	0	0
D19L1_HUMAN	Probable C-mannosyltransferase DPY19L1	0	0	0	0	0	0	0	1	0
DC1I2_HUMAN	Cytoplasmic dynein 1 intermediate chain 2	1	1	0	0	0	0	1	0	1
DCTD_HUMAN	Deoxycytidylate deaminase	0	0	1	0	0	0	0	0	0
DDX10_HUMAN	Probable ATP-dependent RNA helicase DDX10	0	0	0	0	1	0	0	0	0
DDX18_HUMAN	ATP-dependent RNA helicase DDX18	0	0	0	0	0	0	0	0	1
DDX24_HUMAN	ATP-dependent RNA helicase DDX24	0	0	0	0	1	0	0	0	0
DDX27_HUMAN	Probable ATP-dependent RNA helicase DDX27	0	0	0	0	1	0	0	0	0
DDX31_HUMAN	Probable ATP-dependent RNA helicase DDX31	0	0	0	0	1	0	0	0	0
DHX15_HUMAN	Pre-mRNA-splicing factor ATP-dependent RNA helicase DHX15	0	0	0	0	1	0	0	0	0
DHX36_HUMAN	ATP-dependent RNA helicase DHX36	0	0	0	0	2	1	0	0	0
DJB14_HUMAN	DnaJ homolog subfamily B member 14	0	1	0	0	0	0	0	0	0
DJC10_HUMAN	DnaJ homolog subfamily C member 10	0	0	0	0	0	0	0	1	0
DJC13_HUMAN	DnaJ homolog subfamily C member 13	0	0	0	0	0	0	0	2	1
DJC21_HUMAN	DnaJ homolog subfamily C member 21	0	0	0	0	0	0	0	0	1
DMBT1_HUMAN	Deleted in malignant brain tumors 1 protein	1	0	1	0	0	1	0	0	0
DNJC7_HUMAN	DnaJ homolog subfamily C member 7	1	1	0	0	0	0	1	0	0
DNS2B_HUMAN	Deoxyribonuclease-2-beta	0	0	0	0	0	0	0	0	1
DOCK9_HUMAN	Dedicator of cytokinesis protein 9	0	1	0	0	0	0	0	0	0
DSC3_HUMAN	Desmocollin-3	0	0	0	0	0	0	1	0	0
DTNB_HUMAN	Dystrobrevin beta	0	0	0	0	1	0	0	0	0
DYH3_HUMAN	Dynein heavy chain 3, axonemal	0	0	0	0	1	0	0	0	0
DYH8_HUMAN	Dynein heavy chain 8, axonemal	0	1	0	0	0	0	0	0	0
E41L3_HUMAN	Band 4.1-like protein 3	0	0	0	0	1	0	0	0	0
EAA1_HUMAN	Excitatory amino acid transporter 1	0	0	0	0	1	0	0	0	0
EDC4_HUMAN	Enhancer of mRNA-decapping protein 4	0	0	0	0	0	0	0	0	1
EEA1_HUMAN	Early endosome antigen 1	0	1	0	0	0	0	0	0	0
EF1D_HUMAN	Elongation factor 1-delta	0	0	0	0	2	1	1	0	2
EFC11_HUMAN	EF-hand calcium-binding domain-containing protein 11	0	1	0	0	0	0	0	0	0
EFCB5_HUMAN	EF-hand calcium-binding domain-containing protein 5	0	0	0	0	1	0	0	0	0
EI2BB_HUMAN	Translation initiation factor eIF-2B subunit beta	0	0	0	0	1	0	0	0	0
EI2BE_HUMAN	Translation initiation factor eIF-2B subunit epsilon	0	0	0	0	1	0	0	0	2
EIF1_HUMAN	Eukaryotic translation initiation factor 1	0	0	0	0	1	0	0	0	0
EIF1B_HUMAN	Eukaryotic translation initiation factor 1b	0	0	0	0	1	0	0	0	1
ELFN1_HUMAN	Protein ELFN1	0	0	0	0	0	0	0	0	1
ELNE_HUMAN	Neutrophil elastase	0	0	0	0	3	0	0	0	0
ELOC_HUMAN	Elongin-C	1	1	0	0	1	2	0	0	2
ENPL_HUMAN	Endoplasmin	0	0	0	0	0	1	0	0	0
EP2A2_HUMAN	Laforin, isoform 9	0	0	0	0	1	0	0	0	0
EPIPL_HUMAN	Epiplakin	0	0	0	0	1	1	0	0	0
ERF1_HUMAN	Eukaryotic peptide chain release factor subunit 1	0	0	0	0	1	0	0	0	0
ERMIN_HUMAN	Ermin	1	0	0	0	0	0	0	0	0
EVL_HUMAN	Ena/VASP-like protein	0	0	0	0	0	0	1	0	0
EXOS1_HUMAN	Exosome complex component CSL4	0	0	0	0	0	1	0	0	1
EXOS2_HUMAN	Exosome complex component RRP4	0	0	0	0	0	2	1	0	1
EXOS3_HUMAN	Exosome complex component RRP40	0	0	0	0	0	0	0	0	1
EXOS4_HUMAN	Exosome complex component RRP41	0	0	0	0	0	0	0	0	1
EXOS5_HUMAN	Exosome complex component RRP46	0	0	0	0	2	1	0	0	1
EXOS6_HUMAN	Exosome complex component MTR3	0	0	0	0	2	0	0	0	0
F90A2_HUMAN	Putative protein FAM90A2P	0	1	0	0	0	0	0	0	0
FA10_HUMAN	Coagulation factor X	0	0	0	0	1	0	0	0	0
FA13A_HUMAN	Protein FAM13A	0	0	0	0	1	0	0	0	0
FA47E_HUMAN	Protein FAM47E	1	0	0	0	0	0	0	0	0
FA98B_HUMAN	Protein FAM98B	0	0	0	0	3	2	0	1	0
FABP5_HUMAN	Fatty acid-binding protein, epidermal	1	0	0	0	4	2	0	0	1
FABPH_HUMAN	Fatty acid-binding protein, heart	0	0	0	0	1	0	0	0	0
FANCJ_HUMAN	Fanconi anemia group J protein	0	0	0	0	0	0	1	0	0
FAS_HUMAN	Fatty acid synthase	1	1	2	0	0	0	1	0	3
FBLL1_HUMAN	rRNA/tRNA 2'-O-methyltransferase fibrillarin-like protein 1	0	0	1	0	0	0	0	0	0
FBLN5_HUMAN	Fibulin-5	0	0	0	0	1	0	0	0	0
FBX16_HUMAN	F-box only protein 16	0	0	1	0	0	0	0	0	0
FBX31_HUMAN	F-box only protein 31	13	11	11	0	0	0	0	0	0
FBX50_HUMAN	F-box only protein 50	0	0	0	0	0	0	0	0	1
FIP1_HUMAN	Pre-mRNA 3'-end-processing factor FIP1	0	0	0	0	1	0	0	0	0
FKBPL_HUMAN	FK506-binding protein-like	0	0	0	0	0	1	0	1	0
FLNC_HUMAN	Filamin-C	0	0	0	0	1	1	1	0	0
FWCH2_HUMAN	FLYWCH family member 2	0	1	0	0	2	0	0	0	1
G45IP_HUMAN	Growth arrest and DNA damage-inducible proteins-interacting protein 1	0	0	0	0	0	0	0	1	0
G6PI_HUMAN	Glucose-6-phosphate isomerase	0	0	0	0	0	2	0	0	0
GALT4_HUMAN	Polypeptide N-acetylgalactosaminyltransferase 4	0	0	0	0	0	1	0	0	0
GAR1_HUMAN	H/ACA ribonucleoprotein complex subunit 1	0	0	0	0	0	1	0	0	1
GCN1_HUMAN	eIF-2-alpha kinase activator GCN1	0	0	0	0	0	0	0	0	1
GCSH_HUMAN	Glycine cleavage system H protein, mitochondrial	0	1	1	0	0	1	1	0	1
GDIR1_HUMAN	Rho GDP-dissociation inhibitor 1	0	0	0	0	0	1	0	0	0
GDPD3_HUMAN	Lysophospholipase D GDPD3	1	0	0	0	0	0	0	0	0
GEPH_HUMAN	Gephyrin	0	1	1	0	0	0	0	0	0
GGCT_HUMAN	Gamma-glutamylcyclotransferase	2	0	0	0	1	0	0	0	0
GLI2_HUMAN	Zinc finger protein GLI2	1	0	0	0	0	0	0	0	0
GLU2B_HUMAN	Glucosidase 2 subunit beta	0	0	0	0	0	1	0	0	0
GLYG_HUMAN	Glycogenin-1	0	0	0	0	1	0	0	0	0
GNL3L_HUMAN	Guanine nucleotide-binding protein-like 3-like protein	0	0	0	0	1	0	0	0	2
GNRR2_HUMAN	Putative gonadotropin-releasing hormone II receptor	0	0	0	0	0	1	0	0	0
GPC1_HUMAN	Glypican-1	0	0	0	0	0	0	1	0	0
GPC4_HUMAN	Glypican-4	0	0	0	0	1	0	0	0	0
GPDM_HUMAN	Glycerol-3-phosphate dehydrogenase, mitochondrial	0	0	0	0	0	0	1	0	1
GRAP1_HUMAN	GRIP1-associated protein 1	0	0	0	0	1	1	0	0	0
GRSF1_HUMAN	G-rich sequence factor 1	0	0	0	0	0	1	0	0	0
GRWD1_HUMAN	Glutamate-rich WD repeat-containing protein 1	0	0	0	0	1	0	0	0	0
GSDMA_HUMAN	Gasdermin-A	1	0	0	0	0	1	1	0	1
GSHB_HUMAN	Glutathione synthetase	0	0	0	0	0	0	0	0	1
H15_HUMAN	Histone H1.5	0	0	0	0	1	1	1	0	1
HCD2_HUMAN	3-hydroxyacyl-CoA dehydrogenase type-2	0	0	0	0	1	1	0	0	0
HELZ_HUMAN	Probable helicase with zinc finger domain	0	0	0	0	1	1	0	0	0
HEM2_HUMAN	Delta-aminolevulinic acid dehydratase	1	0	0	0	0	0	0	0	0
HEMH_HUMAN	Ferrochelatase, mitochondrial	0	0	0	0	0	0	1	0	0
HIP1_HUMAN	Huntingtin-interacting protein 1	0	0	0	0	0	0	1	0	0
HIPL1_HUMAN	HHIP-like protein 1	1	1	0	0	0	0	0	0	1
HIRA_HUMAN	Protein HIRA	0	0	0	0	1	1	0	1	1
HKDC1_HUMAN	Putative hexokinase HKDC1	0	0	0	0	0	0	0	0	1
HMGC2_HUMAN	3-hydroxymethyl-3-methylglutaryl-CoA lyase, cytoplasmic	0	1	0	0	0	0	0	0	0
HMGN1_HUMAN	Non-histone chromosomal protein HMG-14	2	1	0	0	0	0	0	0	0
HMGN3_HUMAN	High mobility group nucleosome-binding domain-containing protein 3	1	0	0	0	0	0	0	0	0
HMGX3_HUMAN	HMG domain-containing protein 3	0	0	1	0	0	0	0	0	0
HNRH1_HUMAN	Heterogeneous nuclear ribonucleoprotein H	0	2	1	0	1	2	2	1	3
HNRL2_HUMAN	Heterogeneous nuclear ribonucleoprotein U-like protein 2	0	0	0	0	1	1	0	0	1
HP1B3_HUMAN	Heterochromatin protein 1-binding protein 3	0	0	0	0	0	0	0	0	1
HPLN3_HUMAN	Hyaluronan and proteoglycan link protein 3	0	0	0	0	1	0	0	0	0
HUTH_HUMAN	Histidine ammonia-lyase	0	1	1	0	0	0	1	0	1
I2BPL_HUMAN	Interferon regulatory factor 2-binding protein-like	0	0	0	0	0	1	0	0	0
IAH1_HUMAN	Isoamyl acetate-hydrolyzing esterase 1 homolog	0	0	0	0	0	0	0	0	1
IF4E2_HUMAN	Eukaryotic translation initiation factor 4E type 2	0	0	0	0	1	0	0	0	0
IF4H_HUMAN	Eukaryotic translation initiation factor 4H	0	0	0	0	0	1	0	0	0
IFRD2_HUMAN	Interferon-related developmental regulator 2	0	0	0	0	2	0	0	0	0
IGHA2_HUMAN	Immunoglobulin heavy constant alpha 2	0	0	0	0	1	0	0	0	0
IGHM_HUMAN	Immunoglobulin heavy constant mu	0	0	0	0	1	0	0	0	0
IGKC_HUMAN	Immunoglobulin kappa constant	3	0	0	0	12	0	0	0	0
IKIP_HUMAN	Inhibitor of nuclear factor kappa-B kinase-interacting protein	0	0	0	0	0	1	0	0	0
ILVBL_HUMAN	Acetolactate synthase-like protein	0	1	0	0	0	0	0	0	0
IMDH2_HUMAN	Inosine-5'-monophosphate dehydrogenase 2	0	0	0	0	0	0	0	1	0
IQGA1_HUMAN	Ras GTPase-activating-like protein IQGAP1	0	0	0	0	1	0	0	0	0
IRPL2_HUMAN	X-linked interleukin-1 receptor accessory protein-like 2	0	0	1	0	0	0	0	0	0
IRS4_HUMAN	Insulin receptor substrate 4	1	2	1	0	1	1	0	0	2
ISCA2_HUMAN	Iron-sulfur cluster assembly 2 homolog, mitochondrial	0	1	0	0	0	0	0	0	0
ISK7_HUMAN	Serine protease inhibitor Kazal-type 7	0	2	0	0	0	0	0	0	0
ITB5_HUMAN	Integrin beta-5	0	0	0	0	0	0	1	0	0
K1586_HUMAN	E3 SUMO-protein ligase KIAA1586	1	0	0	0	0	0	0	0	0
K1C13_HUMAN	Keratin, type I cytoskeletal 13	0	0	0	0	2	0	0	0	1
K1C17_HUMAN	Keratin, type I cytoskeletal 17	4	1	0	0	4	2	1	1	8
K1C19_HUMAN	Keratin, type I cytoskeletal 19	0	0	0	0	4	0	0	0	0
K2C4_HUMAN	Keratin, type II cytoskeletal 4	0	0	0	0	2	0	1	0	1
K2C6B_HUMAN	Keratin, type II cytoskeletal 6B	2	1	1	0	2	1	1	1	4
K2C75_HUMAN	Keratin, type II cytoskeletal 75	0	1	0	0	0	0	0	0	0
K2C79_HUMAN	Keratin, type II cytoskeletal 79	1	0	0	0	0	0	0	0	0
KCNS3_HUMAN	Potassium voltage-gated channel subfamily S member 3	0	1	0	0	0	0	0	0	0
KHNYN_HUMAN	Protein KHNYN	0	0	0	0	1	0	0	0	0
KI20B_HUMAN	Kinesin-like protein KIF20B	0	0	0	0	0	1	0	0	0
KI67_HUMAN	Proliferation marker protein Ki-67	0	0	0	0	0	1	0	0	1
KIF2A_HUMAN	Kinesin-like protein KIF2A	0	0	0	0	1	0	0	0	0
KIFC1_HUMAN	Kinesin-like protein KIFC1	0	0	0	0	1	0	0	0	0
KMT2B_HUMAN	Histone-lysine N-methyltransferase 2B	0	0	0	0	1	0	0	0	0
KR510_HUMAN	Keratin-associated protein 5-10	0	1	0	0	0	0	0	0	0
KRR1_HUMAN	KRR1 small subunit processome component homolog	0	0	0	0	1	1	0	0	0
KRT84_HUMAN	Keratin, type II cuticular Hb4	0	0	0	0	0	0	0	0	6
KTN1_HUMAN	Kinectin	0	0	0	0	1	0	0	1	1
KV320_HUMAN	Immunoglobulin kappa variable 3-20	0	0	0	0	1	0	1	1	0
LAMB4_HUMAN	Laminin subunit beta-4	0	1	0	0	0	0	0	0	0
LANC1_HUMAN	LanC-like protein 1	2	2	0	0	0	1	1	1	0
LAR1B_HUMAN	La-related protein 1B	0	0	0	0	1	0	0	0	0
LARP7_HUMAN	La-related protein 7	0	0	0	0	1	1	0	0	0
LDAH_HUMAN	Lipid droplet-associated hydrolase	0	0	0	0	1	0	0	0	0
LDHA_HUMAN	L-lactate dehydrogenase A chain	0	0	0	0	1	0	0	0	0
LDHB_HUMAN	L-lactate dehydrogenase B chain	0	0	0	0	0	3	0	0	0
LG3BP_HUMAN	Galectin-3-binding protein	1	0	1	0	0	0	0	0	1
LMNB2_HUMAN	Lamin-B2	0	0	0	0	0	0	0	1	0
LRC23_HUMAN	Leucine-rich repeat-containing protein 23	0	1	0	0	0	0	0	0	0
LS14A_HUMAN	Protein LSM14 homolog A	0	0	0	0	0	0	0	0	1
LSG1_HUMAN	Large subunit GTPase 1 homolog	0	0	0	0	0	0	0	0	1
MA2A1_HUMAN	Alpha-mannosidase 2	0	0	0	0	0	1	0	0	0
MA7D1_HUMAN	MAP7 domain-containing protein 1	0	0	0	0	0	0	0	0	2
MAGT1_HUMAN	Magnesium transporter protein 1	0	0	0	0	1	0	0	0	0
MAP1B_HUMAN	Microtubule-associated protein 1B	1	2	0	0	1	0	0	0	2
MARCS_HUMAN	Myristoylated alanine-rich C-kinase substrate	0	0	0	0	1	0	0	0	0
MATR3_HUMAN	Matrin-3	0	0	0	0	0	0	1	0	1
MCA3_HUMAN	Eukaryotic translation elongation factor 1 epsilon-1	0	0	0	0	1	0	1	0	2
MCCA_HUMAN	Methylcrotonoyl-CoA carboxylase subunit alpha, mitochondrial	3	6	1	0	1	0	1	1	1
MDC1_HUMAN	Mediator of DNA damage checkpoint protein 1	1	0	0	0	0	0	0	0	0
MEX3D_HUMAN	RNA-binding protein MEX3D	0	0	0	0	0	0	0	1	0
MGAP_HUMAN	MAX gene-associated protein	0	1	0	0	0	0	0	0	0
MICA3_HUMAN	[F-actin]-monooxygenase MICAL3	0	0	0	0	0	1	0	0	0
MICU2_HUMAN	Calcium uptake protein 2, mitochondrial	0	0	0	0	1	0	0	0	0
MILK1_HUMAN	MICAL-like protein 1	0	1	0	0	0	0	0	0	0
MLEC_HUMAN	Malectin	0	0	0	0	1	0	0	0	1
MMGT1_HUMAN	Membrane magnesium transporter 1	0	0	0	0	0	1	0	0	0
MMP2_HUMAN	72 kDa type IV collagenase	0	0	0	0	0	1	0	0	0
MMP28_HUMAN	Matrix metalloproteinase-28	0	0	0	0	1	0	1	0	0
MOES_HUMAN	Moesin	0	0	0	0	1	0	0	0	0
MPCP_HUMAN	Phosphate carrier protein, mitochondrial	0	0	0	0	4	0	0	0	1
MPDZ_HUMAN	Multiple PDZ domain protein	0	0	0	0	0	0	0	0	1
MRP3_HUMAN	Canalicular multispecific organic anion transporter 2	0	0	0	0	1	0	0	0	0
MSH5_HUMAN	MutS protein homolog 5	0	0	0	0	1	0	0	0	0
MTA1_HUMAN	Metastasis-associated protein MTA1	0	0	0	0	1	0	0	0	0
MTA70_HUMAN	N6-adenosine-methyltransferase catalytic subunit	0	0	0	0	0	1	0	0	0
MUC16_HUMAN	Mucin-16	1	1	2	0	0	0	1	0	0
MYCB2_HUMAN	E3 ubiquitin-protein ligase MYCBP2	0	1	0	0	0	0	0	0	0
NAA35_HUMAN	N-alpha-acetyltransferase 35, NatC auxiliary subunit	1	0	0	0	0	0	0	0	0
NAIF1_HUMAN	Nuclear apoptosis-inducing factor 1	1	0	0	0	0	0	0	0	0
NAL14_HUMAN	NACHT, LRR and PYD domains-containing protein 14	0	1	0	0	0	0	0	0	0
NBEL2_HUMAN	Neurobeachin-like protein 2	0	0	0	0	0	0	0	1	1
NCAM1_HUMAN	Neural cell adhesion molecule 1	1	0	0	0	0	0	0	0	0
NCKX5_HUMAN	Sodium/potassium/calcium exchanger 5	1	0	0	0	0	0	0	0	0
NECA3_HUMAN	N-terminal EF-hand calcium-binding protein 3	1	0	0	0	0	0	0	0	0
NEMF_HUMAN	Nuclear export mediator factor NEMF	0	0	0	0	0	0	0	1	1
NEP1_HUMAN	Ribosomal RNA small subunit methyltransferase NEP1	0	0	0	0	2	1	0	0	0
NEUA_HUMAN	N-acylneuraminate cytidylyltransferase	0	0	0	0	0	1	0	0	1
NHP2_HUMAN	H/ACA ribonucleoprotein complex subunit 2	0	0	0	0	1	0	0	0	0
NIN_HUMAN	Ninein	0	0	0	0	0	1	0	0	0
NKD2_HUMAN	Protein naked cuticle homolog 2	0	0	0	0	1	0	0	0	0
NOG2_HUMAN	Nucleolar GTP-binding protein 2	0	0	0	0	1	0	0	0	3
NOLC1_HUMAN	Nucleolar and coiled-body phosphoprotein 1	0	0	0	0	0	0	0	1	1
NOP9_HUMAN	Nucleolar protein 9	0	0	0	0	1	1	0	0	0
NPAT_HUMAN	Protein NPAT	0	1	0	0	0	0	0	0	0
NPL4_HUMAN	Nuclear protein localization protein 4 homolog	2	1	0	0	0	0	0	0	0
NRDC_HUMAN	Nardilysin	0	0	0	0	1	0	0	0	0
NSF_HUMAN	Vesicle-fusing ATPase	0	0	0	0	0	0	1	0	0
NUDC2_HUMAN	NudC domain-containing protein 2	2	0	0	0	0	0	1	0	0
NUPL2_HUMAN	Nucleoporin-like protein 2	0	0	0	0	0	1	0	0	0
OGDHL_HUMAN	2-oxoglutarate dehydrogenase-like, mitochondrial	0	0	0	0	0	3	0	0	0
P5CR2_HUMAN	Pyrroline-5-carboxylate reductase 2	0	0	0	0	2	0	0	0	0
PAPD1_HUMAN	Poly(A) RNA polymerase, mitochondrial	0	0	0	0	1	0	0	0	0
PARK7_HUMAN	Protein/nucleic acid deglycase DJ-1	0	0	0	0	0	1	0	0	0
PCCA_HUMAN	Propionyl-CoA carboxylase alpha chain, mitochondrial	1	3	0	0	0	0	0	0	0
PCCB_HUMAN	Propionyl-CoA carboxylase beta chain, mitochondrial	2	2	2	0	0	0	0	0	0
PERL_HUMAN	Lactoperoxidase	0	0	0	0	1	0	0	0	0
PFD1_HUMAN	Prefoldin subunit 1	1	1	0	0	0	0	0	0	0
PFD2_HUMAN	Prefoldin subunit 2	0	0	1	0	0	0	0	0	0
PGAM1_HUMAN	Phosphoglycerate mutase 1	0	0	0	0	0	0	0	0	1
PGBD5_HUMAN	PiggyBac transposable element-derived protein 5	0	1	0	0	0	0	0	0	0
PGK1_HUMAN	Phosphoglycerate kinase 1	0	0	0	0	0	2	0	0	0
PHF5A_HUMAN	PHD finger-like domain-containing protein 5A	0	0	0	0	0	0	1	0	0
PHF8_HUMAN	Histone lysine demethylase PHF8	0	0	0	0	0	1	0	0	0
PI51A_HUMAN	Phosphatidylinositol 4-phosphate 5-kinase type-1 alpha	0	0	0	0	2	0	0	0	0
PIEZ2_HUMAN	Piezo-type mechanosensitive ion channel component 2	1	0	0	0	0	0	0	0	0
PIGR_HUMAN	Polymeric immunoglobulin receptor	0	0	0	0	8	0	0	0	1
PIP_HUMAN	Prolactin-inducible protein	2	1	2	0	3	1	0	0	1
PKCB1_HUMAN	Protein kinase C-binding protein 1	0	0	0	0	0	0	0	0	1
PKP4_HUMAN	Plakophilin-4	0	1	0	0	0	0	0	0	0
PLA1A_HUMAN	Phospholipase A1 member A	0	1	0	0	0	0	0	1	0
PLAP_HUMAN	Phospholipase A-2-activating protein	0	0	0	0	1	0	0	0	0
PLOD1_HUMAN	Procollagen-lysine,2-oxoglutarate 5-dioxygenase 1	1	1	1	0	0	1	0	0	0
PLPL6_HUMAN	Neuropathy target esterase	0	1	0	0	0	0	0	0	0
PLRG1_HUMAN	Pleiotropic regulator 1	0	0	0	0	1	0	0	0	0
PMEPA_HUMAN	Protein TMEPAI	0	1	0	0	0	0	0	0	0
PNM8B_HUMAN	Paraneoplastic antigen-like protein 8B	0	1	0	0	0	0	0	0	0
PNRC1_HUMAN	Proline-rich nuclear receptor coactivator 1	0	0	0	0	0	0	1	0	0
POF1B_HUMAN	Protein POF1B	0	0	0	0	0	1	0	0	0
POSTN_HUMAN	Periostin	0	0	1	0	0	0	0	0	0
POTEJ_HUMAN	POTE ankyrin domain family member J	1	1	0	0	1	0	0	0	0
PP2AA_HUMAN	Serine/threonine-protein phosphatase 2A catalytic subunit alpha isoform	0	0	0	0	1	0	0	0	0
PP6R3_HUMAN	Serine/threonine-protein phosphatase 6 regulatory subunit 3	0	0	0	0	0	0	0	0	1
PPIA_HUMAN	Peptidyl-prolyl cis-trans isomerase A	0	1	1	0	0	5	1	0	2
PPIB_HUMAN	Peptidyl-prolyl cis-trans isomerase B	0	1	0	0	0	0	0	0	0
PPM1K_HUMAN	Protein phosphatase 1K, mitochondrial	0	0	0	0	0	0	1	1	0
PPR35_HUMAN	Protein phosphatase 1 regulatory subunit 35	1	0	0	0	0	0	0	0	1
PR40A_HUMAN	Pre-mRNA-processing factor 40 homolog A	1	1	0	0	0	1	2	0	1
PRAM_HUMAN	PML-RARA-regulated adapter molecule 1	1	0	0	0	0	0	0	0	0
PRDX2_HUMAN	Peroxiredoxin-2	2	2	0	0	3	2	1	1	3
PROL4_HUMAN	Proline-rich protein 4	1	2	1	0	0	1	2	0	0
PRP4_HUMAN	U4/U6 small nuclear ribonucleoprotein Prp4	0	0	0	0	1	0	0	0	0
PRS8_HUMAN	26S proteasome regulatory subunit 8	2	2	0	0	2	0	1	0	2
PSA3_HUMAN	Proteasome subunit alpha type-3	0	1	0	0	2	0	1	1	2
PSB3_HUMAN	Proteasome subunit beta type-3	0	0	0	0	0	1	0	0	1
PSB4_HUMAN	Proteasome subunit beta type-4	0	0	0	0	0	1	0	0	1
PSB5_HUMAN	Proteasome subunit beta type-5	0	3	2	0	4	0	1	0	0
PSD12_HUMAN	26S proteasome non-ATPase regulatory subunit 12	1	0	0	0	0	0	0	0	0
PSD13_HUMAN	26S proteasome non-ATPase regulatory subunit 13	0	0	0	0	0	0	1	0	0
PSIP1_HUMAN	PC4 and SFRS1-interacting protein	0	1	0	0	0	0	0	0	0
PSMD3_HUMAN	26S proteasome non-ATPase regulatory subunit 3	0	1	0	0	1	0	0	0	1
PTBP1_HUMAN	Polypyrimidine tract-binding protein 1	0	0	0	0	3	3	0	1	1
PTH2_HUMAN	Peptidyl-tRNA hydrolase 2, mitochondrial	0	0	0	0	1	0	0	0	0
PYR1_HUMAN	CAD protein	2	1	1	0	1	0	0	0	1
QCR1_HUMAN	Cytochrome b-c1 complex subunit 1, mitochondrial	0	0	0	0	0	0	0	0	1
RAB10_HUMAN	Ras-related protein Rab-10	0	0	0	0	0	0	0	0	1
RAB14_HUMAN	Ras-related protein Rab-14	0	0	0	0	1	0	0	0	0
RAB18_HUMAN	Ras-related protein Rab-18	1	1	0	0	0	0	0	0	0
RAB5C_HUMAN	Ras-related protein Rab-5C	0	0	0	0	1	0	0	0	0
RAB8A_HUMAN	Ras-related protein Rab-8A	0	0	0	0	0	0	0	0	1
RAGP1_HUMAN	Ran GTPase-activating protein 1	0	0	0	0	0	0	0	0	2
RAN_HUMAN	GTP-binding nuclear protein Ran	0	0	0	0	1	3	1	0	0
RANG_HUMAN	Ran-specific GTPase-activating protein	0	0	0	0	0	1	0	0	0
RBBP7_HUMAN	Histone-binding protein RBBP7	0	0	0	0	0	1	0	0	0
RBM10_HUMAN	RNA-binding protein 10	0	0	0	0	0	1	0	0	0
RBM27_HUMAN	RNA-binding protein 27	0	1	0	0	0	0	0	0	0
RBM3_HUMAN	RNA-binding protein 3	0	0	0	0	0	1	0	0	0
RBM34_HUMAN	RNA-binding protein 34	0	0	0	0	2	0	0	0	1
RBMX_HUMAN	RNA-binding motif protein, X chromosome	0	0	0	0	2	0	1	0	0
RCC1L_HUMAN	RCC1-like G exchanging factor-like protein	0	1	0	0	0	0	0	0	0
RECQ4_HUMAN	ATP-dependent DNA helicase Q4	0	0	0	0	2	0	0	0	0
RFA3_HUMAN	Replication protein A 14 kDa subunit	0	0	0	0	1	0	0	0	0
RFC3_HUMAN	Replication factor C subunit 3	0	0	0	0	0	0	1	0	0
RHG35_HUMAN	Rho GTPase-activating protein 35	0	0	0	0	1	1	0	0	0
RIMS2_HUMAN	Regulating synaptic membrane exocytosis protein 2	0	0	0	0	1	0	0	0	1
RL37_HUMAN	60S ribosomal protein L37	0	0	0	0	2	1	1	1	1
RLA0_HUMAN	60S acidic ribosomal protein P0	0	0	0	0	8	4	3	1	4
RLGPB_HUMAN	Ral GTPase-activating protein subunit beta	1	0	0	0	0	0	0	0	0
RM04_HUMAN	39S ribosomal protein L4, mitochondrial	0	0	0	0	0	0	0	1	1
RM10_HUMAN	39S ribosomal protein L10, mitochondrial	0	0	0	0	1	0	0	0	0
RM14_HUMAN	39S ribosomal protein L14, mitochondrial	0	0	1	0	0	0	0	1	1
RM22_HUMAN	39S ribosomal protein L22, mitochondrial	0	0	0	0	1	0	0	0	0
RM24_HUMAN	39S ribosomal protein L24, mitochondrial	0	0	0	0	1	1	0	1	0
RM27_HUMAN	39S ribosomal protein L27, mitochondrial	0	0	0	0	0	1	0	0	0
RM28_HUMAN	39S ribosomal protein L28, mitochondrial	0	0	0	0	2	1	2	0	2
RM33_HUMAN	39S ribosomal protein L33, mitochondrial	0	0	0	0	0	1	0	0	0
RM43_HUMAN	39S ribosomal protein L43, mitochondrial	0	0	0	0	1	0	0	0	0
RM45_HUMAN	39S ribosomal protein L45, mitochondrial	0	0	0	0	0	0	1	0	0
RM47_HUMAN	39S ribosomal protein L47, mitochondrial	0	0	0	0	1	1	0	0	1
RM48_HUMAN	39S ribosomal protein L48, mitochondrial	0	0	0	0	0	1	0	0	0
RM49_HUMAN	39S ribosomal protein L49, mitochondrial	0	0	0	0	0	0	1	0	0
RM53_HUMAN	39S ribosomal protein L53, mitochondrial	0	0	0	0	1	1	0	0	1
RP1L1_HUMAN	Retinitis pigmentosa 1-like 1 protein	0	0	0	0	1	0	0	0	0
RPA34_HUMAN	DNA-directed RNA polymerase I subunit RPA34	0	0	0	0	2	0	1	2	1
RPA49_HUMAN	DNA-directed RNA polymerase I subunit RPA49	0	0	0	0	1	0	0	0	1
RPOM_HUMAN	DNA-directed RNA polymerase, mitochondrial	0	0	0	0	2	0	0	0	2
RRBP1_HUMAN	Ribosome-binding protein 1	0	0	0	0	2	0	0	0	1
RRP5_HUMAN	Protein RRP5 homolog	0	0	0	0	0	1	0	0	0
RS26L_HUMAN	Putative 40S ribosomal protein S26-like 1	0	0	0	0	0	0	1	0	0
RSBN1_HUMAN	Lysine-specific demethylase 9	0	0	0	0	1	0	0	0	0
RT09_HUMAN	28S ribosomal protein S9, mitochondrial	0	0	0	0	2	0	0	0	0
RT14_HUMAN	28S ribosomal protein S14, mitochondrial	0	0	0	0	0	0	1	0	1
RT17_HUMAN	28S ribosomal protein S17, mitochondrial	0	0	0	0	1	0	0	0	0
RT28_HUMAN	28S ribosomal protein S28, mitochondrial	0	0	0	0	0	1	0	0	1
RU17_HUMAN	U1 small nuclear ribonucleoprotein 70 kDa	0	0	0	0	0	0	0	1	0
RU2A_HUMAN	U2 small nuclear ribonucleoprotein A'	0	0	0	0	2	1	0	0	0
RU2B_HUMAN	U2 small nuclear ribonucleoprotein B''	0	0	0	0	2	0	0	0	0
S100P_HUMAN	Protein S100-P	0	0	0	0	1	0	0	0	0
S10AE_HUMAN	Protein S100-A14	1	0	0	0	0	0	0	0	0
S12A2_HUMAN	Solute carrier family 12 member 2	1	1	0	0	0	0	0	0	0
S23A3_HUMAN	Solute carrier family 23 member 3	0	1	0	0	0	0	0	0	0
S26A3_HUMAN	Chloride anion exchanger	0	0	0	0	0	1	0	0	0
S29P2_HUMAN	Putative protein SNX29P2	0	0	0	0	0	0	1	0	0
S35F3_HUMAN	Putative thiamine transporter SLC35F3	0	1	0	0	0	0	0	0	0
SAP3_HUMAN	Ganglioside GM2 activator	0	0	0	0	1	0	0	0	0
SARNP_HUMAN	SAP domain-containing ribonucleoprotein	0	1	0	0	0	0	0	0	0
SC22B_HUMAN	Vesicle-trafficking protein SEC22b	0	0	0	0	0	1	0	0	1
SC24A_HUMAN	Protein transport protein Sec24A	1	0	0	0	0	0	0	0	0
SDHA_HUMAN	Succinate dehydrogenase [ubiquinone] flavoprotein subunit, mitochondrial	1	0	0	0	1	1	1	0	1
SETD2_HUMAN	Histone-lysine N-methyltransferase SETD2	0	1	0	0	0	0	0	0	0
SF3A2_HUMAN	Splicing factor 3A subunit 2	0	0	0	0	1	0	0	0	0
SF3A3_HUMAN	Splicing factor 3A subunit 3	0	0	0	0	0	1	0	0	0
SF3B1_HUMAN	Splicing factor 3B subunit 1	0	0	0	0	1	0	0	1	0
SF3B2_HUMAN	Splicing factor 3B subunit 2	0	0	0	0	1	0	0	0	1
SFPQ_HUMAN	Splicing factor, proline- and glutamine-rich	0	0	0	0	0	1	0	1	0
SFXN1_HUMAN	Sideroflexin-1	0	0	0	0	1	0	0	0	0
SG2A2_HUMAN	Mammaglobin-A	0	0	0	0	1	0	0	0	0
SGTA_HUMAN	Small glutamine-rich tetratricopeptide repeat-containing protein alpha	0	0	0	0	0	0	0	0	1
SH23A_HUMAN	SH2 domain-containing protein 3A	0	0	0	0	1	0	0	0	0
SHAN1_HUMAN	SH3 and multiple ankyrin repeat domains protein 1	1	0	0	0	0	0	0	0	0
SHRM3_HUMAN	Protein Shroom3	0	0	1	0	1	1	2	1	0
SIAS_HUMAN	Sialic acid synthase	0	1	0	0	1	0	0	0	1
SKI_HUMAN	Ski oncogene	0	0	0	0	0	1	1	2	2
SKIV2_HUMAN	Helicase SKI2W	0	1	1	0	2	1	0	1	2
SKP1_HUMAN	S-phase kinase-associated protein 1	0	2	0	0	0	0	0	0	0
SLBP_HUMAN	Histone RNA hairpin-binding protein	0	0	0	0	0	0	1	0	0
SLIRP_HUMAN	SRA stem-loop-interacting RNA-binding protein, mitochondrial	0	0	0	0	1	2	0	0	0
SLUR1_HUMAN	Secreted Ly-6/uPAR-related protein 1	0	0	0	0	0	1	0	0	1
SLX1_HUMAN	Structure-specific endonuclease subunit SLX1	0	0	0	0	0	0	0	0	1
SMC2_HUMAN	Structural maintenance of chromosomes protein 2	0	0	0	0	0	0	1	0	0
SMD2_HUMAN	Small nuclear ribonucleoprotein Sm D2	0	0	0	0	0	0	1	0	0
SMRD2_HUMAN	SWI/SNF-related matrix-associated actin-dependent regulator of chromatin subfamily D member 2	0	0	0	0	0	1	0	0	0
SNPC2_HUMAN	snRNA-activating protein complex subunit 2	0	0	0	0	1	0	0	0	0
SODC_HUMAN	Superoxide dismutase [Cu-Zn]	0	0	0	0	2	1	0	0	0
SON_HUMAN	Protein SON	0	0	0	0	1	1	0	0	0
SPAS2_HUMAN	Spermatogenesis-associated serine-rich protein 2	0	0	0	0	1	0	0	0	0
SPB4_HUMAN	Serpin B4	0	0	0	0	3	0	0	0	0
SPIT2_HUMAN	Kunitz-type protease inhibitor 2	0	0	0	0	0	1	0	0	0
SPR1A_HUMAN	Cornifin-A	0	0	0	0	1	0	0	0	0
SPS2L_HUMAN	SPATS2-like protein	0	0	0	0	1	0	0	0	0
SPT6H_HUMAN	Transcription elongation factor SPT6	0	1	0	0	0	0	0	0	0
SPTB2_HUMAN	Spectrin beta chain, non-erythrocytic 1	0	0	0	0	1	0	0	0	1
SPTN1_HUMAN	Spectrin alpha chain, non-erythrocytic 1	1	0	0	0	0	1	0	0	0
SRCAP_HUMAN	Helicase SRCAP	0	0	0	0	1	0	0	0	0
SREC2_HUMAN	Scavenger receptor class F member 2	0	1	0	0	0	0	0	0	0
SRP19_HUMAN	Signal recognition particle 19 kDa protein	0	0	0	0	1	0	0	0	0
SRSF4_HUMAN	Serine/arginine-rich splicing factor 4	0	0	0	0	0	0	0	0	1
SRSF9_HUMAN	Serine/arginine-rich splicing factor 9	0	0	0	0	1	0	0	0	0
SSF1_HUMAN	Suppressor of SWI4 1 homolog	0	0	0	0	2	0	0	0	0
SSRG_HUMAN	Translocon-associated protein subunit gamma	0	0	0	0	1	0	0	0	0
STMN1_HUMAN	Stathmin	0	0	1	0	0	1	0	0	0
STOX2_HUMAN	Storkhead-box protein 2	0	0	0	0	1	0	0	0	0
STRN3_HUMAN	Striatin-3	1	0	0	0	0	0	0	0	0
STX19_HUMAN	Syntaxin-19	0	0	0	0	0	0	1	0	0
SYAM_HUMAN	Alanine--tRNA ligase, mitochondrial	0	0	0	0	0	0	0	0	1
SYCP1_HUMAN	Synaptonemal complex protein 1	0	0	0	0	0	1	0	0	0
SYSM_HUMAN	Serine--tRNA ligase, mitochondrial	0	0	0	0	0	0	0	1	0
SYTC2_HUMAN	Probable threonine--tRNA ligase 2, cytoplasmic	0	0	0	0	0	1	0	0	0
SYVC_HUMAN	Valine--tRNA ligase	0	0	0	0	2	1	0	0	0
TALDO_HUMAN	Transaldolase	0	0	0	0	1	0	0	0	0
TAP26_HUMAN	Thyroid transcription factor 1-associated protein 26	0	0	0	0	1	0	1	1	0
TBA8_HUMAN	Tubulin alpha-8 chain	0	1	0	0	0	0	0	0	0
TBCA_HUMAN	Tubulin-specific chaperone A	0	0	0	0	0	1	0	0	0
TBCD4_HUMAN	TBC1 domain family member 4	8	8	5	0	0	0	0	0	0
TBR1_HUMAN	T-box brain protein 1	1	1	0	0	0	1	1	1	0
TCPE_HUMAN	T-complex protein 1 subunit epsilon	1	2	2	0	2	0	0	0	0
TEX2_HUMAN	Testis-expressed protein 2	0	0	0	0	1	0	0	0	0
TEX43_HUMAN	Testis-expressed protein 43	0	1	0	0	0	0	0	0	0
TF3C3_HUMAN	General transcription factor 3C polypeptide 3	0	0	0	0	1	0	0	0	0
TF7L1_HUMAN	Transcription factor 7-like 1	0	0	0	0	0	0	0	0	1
TFB1M_HUMAN	Dimethyladenosine transferase 1, mitochondrial	0	0	0	0	0	1	0	0	1
TGO1_HUMAN	Transport and Golgi organization protein 1 homolog	0	0	0	0	1	0	0	0	0
THIO_HUMAN	Thioredoxin	0	0	0	0	3	1	0	0	0
THUM3_HUMAN	THUMP domain-containing protein 3	0	0	0	0	1	1	0	0	1
TITIN_HUMAN	Titin	1	0	0	0	0	0	0	0	1
TKT_HUMAN	Transketolase	0	0	0	0	2	1	0	0	0
TM109_HUMAN	Transmembrane protein 109	0	0	0	0	1	1	0	0	0
TNC18_HUMAN	Trinucleotide repeat-containing gene 18 protein	0	0	0	0	1	0	0	0	0
TNIK_HUMAN	TRAF2 and NCK-interacting protein kinase	0	0	0	0	0	0	1	0	0
TNK1_HUMAN	Non-receptor tyrosine-protein kinase TNK1	0	0	0	0	0	1	0	0	0
TOM70_HUMAN	Mitochondrial import receptor subunit TOM70	0	0	0	0	1	0	0	0	0
TP53B_HUMAN	TP53-binding protein 1	0	0	0	0	0	1	0	0	0
TRFE_HUMAN	Serotransferrin	0	0	0	0	1	0	0	0	0
TRIM5_HUMAN	Tripartite motif-containing protein 5	0	0	0	0	0	0	1	0	0
TRIML_HUMAN	Probable E3 ubiquitin-protein ligase TRIML1	0	0	1	0	0	0	0	0	0
TRM1L_HUMAN	TRMT1-like protein	0	0	0	0	2	0	0	0	1
TRM6_HUMAN	tRNA (adenine(58)-N(1))-methyltransferase non-catalytic subunit TRM6	0	0	0	0	1	0	0	0	0
TSN14_HUMAN	Tetraspanin-14	0	0	0	0	0	1	0	0	0
TTC1_HUMAN	Tetratricopeptide repeat protein 1	0	0	0	0	0	1	0	0	0
TVA4_HUMAN	T cell receptor alpha variable 4	0	0	0	0	1	0	0	0	0
U1SBP_HUMAN	U11/U12 small nuclear ribonucleoprotein 35 kDa protein	0	0	0	0	1	1	0	0	0
U2AF2_HUMAN	Splicing factor U2AF 65 kDa subunit	0	0	0	0	1	0	0	0	0
U520_HUMAN	U5 small nuclear ribonucleoprotein 200 kDa helicase	0	0	0	0	1	0	1	0	0
U5S1_HUMAN	116 kDa U5 small nuclear ribonucleoprotein component	0	0	0	0	0	1	0	0	0
UBE2O_HUMAN	(E3-independent) E2 ubiquitin-conjugating enzyme	0	0	0	0	0	0	2	0	1
UBP2L_HUMAN	Ubiquitin-associated protein 2-like	0	1	0	0	0	0	1	1	0
UBP34_HUMAN	Ubiquitin carboxyl-terminal hydrolase 34	0	1	0	0	0	0	0	0	0
UBR2_HUMAN	E3 ubiquitin-protein ligase UBR2	0	0	0	0	1	0	0	0	0
UCHL1_HUMAN	Ubiquitin carboxyl-terminal hydrolase isozyme L1	0	0	0	0	0	1	0	0	0
UDB28_HUMAN	UDP-glucuronosyltransferase 2B28	0	0	0	0	0	0	0	0	1
UFL1_HUMAN	E3 UFM1-protein ligase 1	0	0	0	0	0	0	1	0	0
UQCC3_HUMAN	Ubiquinol-cytochrome-c reductase complex assembly factor 3	0	0	0	0	0	1	1	0	0
VAPA_HUMAN	Vesicle-associated membrane protein-associated protein A	0	0	0	0	3	0	0	0	0
VCIP1_HUMAN	Deubiquitinating protein VCIP135	0	1	0	0	0	0	0	0	0
VDAC3_HUMAN	Voltage-dependent anion-selective channel protein 3	0	0	0	0	1	0	0	0	0
VINC_HUMAN	Vinculin	0	0	1	0	0	0	0	0	0
VP13B_HUMAN	Vacuolar protein sorting-associated protein 13B	0	0	1	0	0	0	0	0	0
VTM2L_HUMAN	V-set and transmembrane domain-containing protein 2-like protein	0	0	0	0	1	0	0	0	1
VWA3B_HUMAN	von Willebrand factor A domain-containing protein 3B	0	0	0	0	1	0	0	0	0
WDR36_HUMAN	WD repeat-containing protein 36	0	0	0	0	2	0	0	0	0
WRN_HUMAN	Werner syndrome ATP-dependent helicase	0	0	0	0	1	0	0	0	0
WSB1_HUMAN	WD repeat and SOCS box-containing protein 1	0	0	0	0	0	0	0	0	1
XPO2_HUMAN	Exportin-2	0	0	0	0	1	0	0	0	1
YBOX3_HUMAN	Y-box-binding protein 3	0	0	0	0	2	1	0	1	3
YMEL1_HUMAN	ATP-dependent zinc metalloprotease YME1L1	0	0	0	0	1	1	0	0	1
YTDC2_HUMAN	Probable ATP-dependent RNA helicase YTHDC2	0	0	0	0	0	1	0	0	0
Z286B_HUMAN	Putative zinc finger protein 286B	0	0	0	0	1	0	0	0	0
Z3H7A_HUMAN	Zinc finger CCCH domain-containing protein 7A	0	0	0	0	1	0	0	0	0
ZBT21_HUMAN	Zinc finger and BTB domain-containing protein 21	0	0	0	0	2	0	2	0	1
ZBT47_HUMAN	Zinc finger and BTB domain-containing protein 47	0	0	0	0	1	0	0	0	0
ZC3H4_HUMAN	Zinc finger CCCH domain-containing protein 4	1	0	0	0	0	0	0	0	0
ZEB2_HUMAN	Zinc finger E-box-binding homeobox 2	1	0	0	0	0	0	0	0	0
ZG16B_HUMAN	Zymogen granule protein 16 homolog B	0	0	0	0	2	0	0	0	0
ZN107_HUMAN	Zinc finger protein 107	0	0	0	0	0	0	0	0	1
ZN287_HUMAN	Zinc finger protein 287	0	1	0	0	0	0	0	0	0
ZN425_HUMAN	Zinc finger protein 425	0	1	0	0	0	0	0	0	0
ZN462_HUMAN	Zinc finger protein 462	0	1	0	0	0	0	0	0	0
ZN574_HUMAN	Zinc finger protein 574	0	0	0	0	1	0	0	0	0
ZN593_HUMAN	Zinc finger protein 593	0	0	0	0	0	0	0	0	1
ZN665_HUMAN	Zinc finger protein 665	0	0	0	0	0	1	0	0	1
ZN800_HUMAN	Zinc finger protein 800	0	0	0	0	0	1	0	0	0
ZN865_HUMAN	Zinc finger protein 865	0	0	0	0	1	0	0	0	0
ZNF99_HUMAN	Zinc finger protein 99	0	0	0	0	0	0	0	1	0

## Sheet: Identified proteins (norm.)
Table S3-2. Spectral counts of proteins identified on RIOK(WT)- and RIOK1(kd)-StHA after normalization
					1Spectral counts of proteins identified on USP16-StHA				1Spectral counts of proteins identified on USP16(C205S)-StHA
UniProt Identifier	UniProt Name	Gene Name	Description	Protein length in amino acids	USP16-StHA_I	USP16-StHA_II	USP16-StHA_III	USP16-StHA Average	USP16(C205S)-StHA_I	USP16(C205S)-StHA_II	USP16(C205S)-StHA_III	USP16(C205S)-StHA Average
P62280	RS11_HUMAN	RPS11	40S ribosomal protein S11	158	554.385	525.316	735.058	604.92	453.426	579.182	480.084	504.231
P63220	RS21_HUMAN	RPS21	40S ribosomal protein S21	83	627.083	445.783	533.054	535.307	510.843	624.772	374.931	503.516
Q9Y5T5	UBP16_HUMAN	USP16	Ubiquitin carboxyl-terminal hydrolase 16	823	515.188	515.188	515.188	515.188	515.188	515.188	515.188	515.188
P23396	RS3_HUMAN	RPS3	40S ribosomal protein S3	243	454.498	411.523	515.87	460.631	318.887	313.823	336.165	322.958
P62249	RS16_HUMAN	RPS16	40S ribosomal protein S16	146	399.967	390.411	555.569	448.649	400.567	585	412.97	466.179
P62857	RS28_HUMAN	RPS28	40S ribosomal protein S28	69	459.95	420.29	454.19	444.81	423.788	442.081	422.816	429.562
P39019	RS19_HUMAN	RPS19	40S ribosomal protein S19	145	367.706	400	559.4	442.369	433.579	420.739	362.164	405.494
P62241	RS8_HUMAN	RPS8	40S ribosomal protein S8	208	372.294	370.192	496.321	412.936	358.488	410.625	392.731	387.282
P61247	RS3A_HUMAN	RPS3A	40S ribosomal protein S3a	264	432.771	367.424	418.972	406.389	382.132	473.73	302.057	385.973
P25398	RS12_HUMAN	RPS12	40S ribosomal protein S12	132	355.834	295.455	418.972	356.754	365.517	277.305	279.956	307.593
P62081	RS7_HUMAN	RPS7	40S ribosomal protein S7	194	379.53	360.825	294.576	344.977	339.14	157.235	220.562	238.979
P62263	RS14_HUMAN	RPS14	40S ribosomal protein S14	151	369.909	291.391	366.254	342.518	300.16	606.032	309.132	405.108
P62269	RS18_HUMAN	RPS18	40S ribosomal protein S18	152	342.42	315.789	363.844	340.685	259.71	200.682	332.69	264.36
P08708	RS17_HUMAN	RPS17	40S ribosomal protein S17	135	413.75	288.889	300.419	334.353	314.074	203.357	259.327	258.92
P63173	RL38_HUMAN	RPL38	60S ribosomal protein L38	70	253.892	314.286	421.366	329.848	250.64	174.306	277.851	234.266
P62753	RS6_HUMAN	RPS6	40S ribosomal protein S6	249	295.698	273.092	407.194	325.328	311.203	306.261	265.576	294.347
P62244	RS15A_HUMAN	RPS15A	40S ribosomal protein S15a	130	312.483	323.077	269.431	301.664	247.427	211.179	164.573	207.726
P62847	RS24_HUMAN	RPS24	40S ribosomal protein S24	133	343.614	270.677	263.354	292.548	219.86	252.285	146.237	206.128
P62277	RS13_HUMAN	RPS13	40S ribosomal protein S13	151	260.618	331.126	256.378	282.707	251.747	80.8042	206.088	179.546
P62273	RS29_HUMAN	RPS29	40S ribosomal protein S29	56	204.021	214.286	395.031	271.112	287.192	163.412	312.582	254.395
P46781	RS9_HUMAN	RPS9	40S ribosomal protein S9	194	261.745	226.804	275.571	254.707	256.239	157.235	250.638	221.371
P62851	RS25_HUMAN	RPS25	40S ribosomal protein S25	125	213.269	264	280.209	252.493	175.448	170.82	155.596	167.288
Q13442	HAP28_HUMAN	PDAP1	28 kDa heat- and acid-stable phosphoprotein	181	238.462	193.37	315.734	249.189	226.176	252.792	150.438	209.802
P15880	RS2_HUMAN	RPS2	40S ribosomal protein S2	293	264.291	259.386	207.627	243.768	174.65	239.448	139.399	184.499
P46782	RS5_HUMAN	RPS5	40S ribosomal protein S5	204	242.691	235.294	253.026	243.671	258.012	224.291	171.614	217.972
P63244	RACK1_HUMAN	RACK1	Receptor of activated protein C kinase 1	317	244.281	208.202	244.246	232.243	138.366	144.339	153.388	145.364
P60866	RS20_HUMAN	RPS20	40S ribosomal protein S20	119	202.687	218.487	263.354	228.176	196.581	281.966	228.818	235.788
P46779	RL28_HUMAN	RPL28	60S ribosomal protein L28	137	222.387	167.883	269.121	219.797	245.457	289.45	141.967	225.625
P08865	RSSA_HUMAN	RPSA	40S ribosomal protein SA	295	202.253	216.949	212.469	210.557	168.51	196.464	158.234	174.402
P62701	RS4X_HUMAN	RPS4X	40S ribosomal protein S4, X isoform	263	202.728	197.719	196.264	198.903	166.776	139.18	125.719	143.892
P46783	RS10_HUMAN	RPS10	40S ribosomal protein S10	165	184.649	139.394	256.97	193.671	177.22	166.383	153.239	165.614
P62266	RS23_HUMAN	RPS23	40S ribosomal protein S23	143	186.424	146.853	206.263	179.847	286.279	170.649	190.415	215.781
P62979	RS27A_HUMAN	RPS27A	Ubiquitin-40S ribosomal protein S27a	156	179.027	160.256	189.075	176.119	140.584	293.304	137.144	190.344
P19338	NUCL_HUMAN	NCL	Nucleolin	710	153.766	163.38	207.716	174.954	175.036	193.333	147.926	172.098
P62424	RL7A_HUMAN	RPL7A	60S ribosomal protein L7a	266	162.262	165.414	194.05	173.909	175.888	126.143	124.302	142.111
P42677	RS27_HUMAN	RPS27	40S ribosomal protein S27	84	181.352	107.143	219.462	169.319	104.433	108.941	69.4626	94.2792
P05387	RLA2_HUMAN	RPLP2	60S acidic ribosomal protein P2	115	154.543	182.609	160.302	165.818	127.136	106.099	135.301	122.846
P26373	RL13_HUMAN	RPL13	60S ribosomal protein L13	211	144.394	146.919	200.948	164.087	228.665	187.937	175.138	197.247
P61353	RL27_HUMAN	RPL27	60S ribosomal protein L27	136	168.017	139.706	176.215	161.313	139.757	112.146	143.011	131.638
Q2NL82	TSR1_HUMAN	TSR1	Pre-rRNA-processing protein TSR1 homolog	804	162.63	135.572	174.259	157.487	96.3802	91.0555	72.5729	86.6695
P36578	RL4_HUMAN	RPL4	60S ribosomal protein L4	427	139.73	156.909	159.739	152.126	112.994	107.155	95.6535	105.268
Q9NRX1	PNO1_HUMAN	PNO1	RNA-binding protein PNO1	252	95.7133	166.667	182.885	148.422	104.433	84.7322	77.1807	88.7821
P62888	RL30_HUMAN	RPL30	60S ribosomal protein L30	115	165.582	165.217	112.212	147.67	165.277	185.674	67.6506	139.534
Q02878	RL6_HUMAN	RPL6	60S ribosomal protein L6	288	141.051	118.056	172.826	143.978	147.222	148.281	148.573	148.025
Q07020	RL18_HUMAN	RPL18	60S ribosomal protein L18	188	121.544	95.7447	205.92	141.07	163.316	146.028	124.146	144.497
Q14152	EIF3A_HUMAN	EIF3A	Eukaryotic translation initiation factor 3 subunit A	1382	104.717	130.97	185.415	140.367	118.489	105.946	125.254	116.563
Q13895	BYST_HUMAN	BYSL	Bystin	437	153.962	116.705	147.647	139.438	110.408	118.664	102.366	110.479
P83731	RL24_HUMAN	RPL24	60S ribosomal protein L24	157	88.9431	114.65	211.354	138.316	176.938	136.003	161.047	157.996
P84098	RL19_HUMAN	RPL19	60S ribosomal protein L19	196	116.583	107.143	188.11	137.279	119.353	171.194	158.772	149.773
P18077	RL35A_HUMAN	RPL35A	60S ribosomal protein L35a	110	115.406	127.273	167.589	136.756	119.624	110.922	70.7256	100.424
P18621	RL17_HUMAN	RPL17	60S ribosomal protein L17	184	151.783	125	130.246	135.676	143.028	149.202	95.1336	129.121
P46777	RL5_HUMAN	RPL5	60S ribosomal protein L5	297	145.326	121.212	136.554	134.364	152.607	154.059	85.1327	130.599
Q02543	RL18A_HUMAN	RPL18A	60S ribosomal protein L18a	176	137.044	107.955	157.115	134.038	157.837	155.984	110.509	141.443
P06702	S10A9_HUMAN	S100A9	Protein S100-A9	114	89.085	149.123	161.709	133.305	0	0	0	0
Q7KZF4	SND1_HUMAN	SND1	Staphylococcal nuclease domain-containing protein 1	910	140.896	119.78	133.703	131.46	88.3668	100.561	72.6686	87.1989
P11182	ODB2_HUMAN	DBT	Lipoamide acyltransferase component of branched-chain alpha-keto acid dehydrogenase complex, mitochondrial	482	171.193	89.2116	126.213	128.873	130.434	221.499	133.161	161.698
Q96GA3	LTV1_HUMAN	LTV1	Protein LTV1 homolog	475	117.592	98.9474	151.359	122.633	144.668	96.3271	98.2714	113.089
Q13347	EIF3I_HUMAN	EIF3I	Eukaryotic translation initiation factor 3 subunit I	325	109.369	132.308	124.789	122.155	112.467	131.4	113.705	119.191
P62917	RL8_HUMAN	RPL8	60S ribosomal protein L8	257	113.609	108.949	143.461	122.007	130.847	118.691	143.79	131.109
P62829	RL23_HUMAN	RPL23	60S ribosomal protein L23	140	117.879	128.571	118.509	121.653	135.764	87.1531	97.2477	106.721
P30050	RL12_HUMAN	RPL12	60S ribosomal protein L12	165	84.6307	121.212	156.416	120.753	115.193	129.409	153.239	132.614
O15372	EIF3H_HUMAN	EIF3H	Eukaryotic translation initiation factor 3 subunit H	352	104.586	119.318	136.166	120.023	74.7649	77.9922	77.3561	76.7044
P62841	RS15_HUMAN	RPS15	40S ribosomal protein S15	145	166.343	103.448	88.9955	119.596	50.4162	42.0739	13.4135	35.3012
Q9ULX3	NOB1_HUMAN	NOB1	RNA-binding protein NOB1	412	104.761	94.6602	156.606	118.676	110.01	96.2492	151.064	119.108
P46778	RL21_HUMAN	RPL21	60S ribosomal protein L21	160	111.078	112.5	126.739	116.772	100.517	133.453	133.716	122.562
P60842	IF4A1_HUMAN	EIF4A1	Eukaryotic initiation factor 4A-I	406	131.324	96.0591	108.974	112.119	64.8208	97.6716	28.7432	63.7452
P32969	RL9_HUMAN	RPL9	60S ribosomal protein L9	192	105.788	88.5417	134.42	109.583	129.454	95.3237	101.3	108.692
P18124	RL7_HUMAN	RPL7	60S ribosomal protein L7	248	87.0195	108.871	126.367	107.419	106.118	147.598	70.583	108.1
O75821	EIF3G_HUMAN	EIF3G	Eukaryotic translation initiation factor 3 subunit G	320	107.111	103.125	109.457	106.564	105.086	66.7266	85.0917	85.6349
O15371	EIF3D_HUMAN	EIF3D	Eukaryotic translation initiation factor 3 subunit D	548	101.928	100.365	114.376	105.556	82.7083	111.327	85.1805	93.0719
P42766	RL35_HUMAN	RPL35	60S ribosomal protein L35	123	82.5666	97.561	134.889	105.005	130.754	24.7997	79.0632	78.2057
P62750	RL23A_HUMAN	RPL23A	60S ribosomal protein L23a	156	105.788	102.564	106.355	104.902	112.467	97.7679	49.8706	86.7018
P62899	RL31_HUMAN	RPL31	60S ribosomal protein L31	125	101.557	88	117.983	102.513	81.8759	97.6115	140.037	106.508
P06748	NPM_HUMAN	NPM1	Nucleophosmin	294	99.3116	95.2381	112.866	102.472	134.272	155.631	125.694	138.532
P37108	SRP14_HUMAN	SRP14	Signal recognition particle 14 kDa protein	136	102.677	88.2353	108.44	99.7841	0	0	0	0
P39023	RL3_HUMAN	RPL3	60S ribosomal protein L3	403	81.9007	99.2556	114.36	98.5053	87.0711	83.2604	72.3928	80.9081
P62910	RL32_HUMAN	RPL32	60S ribosomal protein L32	135	141.051	81.4815	68.277	96.9366	129.962	90.381	43.2212	87.8546
P49458	SRP09_HUMAN	SRP9	Signal recognition particle 9 kDa protein	86	88.5671	69.7674	128.615	95.6498	0	0	0	0
Q8NC51	PAIRB_HUMAN	SERBP1	Plasminogen activator inhibitor 1 RNA-binding protein	408	93.3427	83.3333	103.922	93.5325	89.5876	52.3346	66.7386	69.5536
P62906	RL10A_HUMAN	RPL10A	60S ribosomal protein L10a	217	81.9007	92.1659	101.943	92.0034	94.327	98.3987	62.7405	85.1554
P05109	S10A8_HUMAN	S100A8	Protein S100-A8	93	54.6005	129.032	79.2894	87.6407	0	0	0	0
O00303	EIF3F_HUMAN	EIF3F	Eukaryotic translation initiation factor 3 subunit F	357	81.786	84.0336	92.9485	86.256	69.6223	85.4442	70.8247	75.2971
P49207	RL34_HUMAN	RPL34	60S ribosomal protein L34	117	86.8008	85.4701	78.7811	83.684	149.956	182.5	132.988	155.148
P35268	RL22_HUMAN	RPL22	60S ribosomal protein L22	128	49.5883	70.3125	129.62	83.1735	57.1121	95.3237	30.3899	60.9419
P61513	RL37A_HUMAN	RPL37A	60S ribosomal protein L37a	92	68.9924	97.8261	80.1512	82.3233	95.3523	66.3122	63.4224	75.029
Q86UE4	LYRIC_HUMAN	LYRIC	Protein LYRIC	582	82.8858	67.0103	95.0247	81.6402	67.8279	52.4117	33.4185	51.2194
Q53EL6	PDCD4_HUMAN	PDCD4	Programmed cell death protein 4	469	75.7887	70.3625	98.2664	81.4725	74.818	110.567	70.4994	85.2949
P60228	EIF3E_HUMAN	EIF3E	Eukaryotic translation initiation factor 3 subunit E	445	85.5816	62.9213	95.2809	81.2613	55.8543	61.6927	56.8189	58.122
P27635	RL10_HUMAN	RPL10	60S ribosomal protein L10	214	88.9809	60.7477	86.1438	78.6241	68.321	57.0161	45.4429	56.9266
Q9Y262	EIF3L_HUMAN	EIF3L	Eukaryotic translation initiation factor 3 subunit L	564	74.277	62.0567	88.2516	74.8618	62.2157	48.676	86.2125	65.7014
Q9Y3U8	RL36_HUMAN	RPL36	60S ribosomal protein L36	105	120.901	66.6667	35.1139	74.2272	83.5468	145.255	18.5234	82.4418
Q9NSI2	F207A_HUMAN	FAM207A	Protein FAM207A	230	55.194	73.913	88.1664	72.4245	38.1409	0	33.8253	23.9887
P55884	EIF3B_HUMAN	EIF3B	Eukaryotic translation initiation factor 3 subunit B	814	65.5004	71.2531	79.265	72.0062	64.6615	59.9579	74.0707	66.2301
P62913	RL11_HUMAN	RPL11	60S ribosomal protein L11	178	64.1862	78.6517	72.4963	71.7781	131.422	119.958	98.3404	116.573
P50914	RL14_HUMAN	RPL14	60S ribosomal protein L14	215	53.1402	83.7209	77.1689	71.3433	68.0032	56.7509	63.3241	62.6927
P47914	RL29_HUMAN	RPL29	60S ribosomal protein L29	159	39.9202	62.8931	104.348	69.0537	119.54	38.3693	73.3945	77.1013
P46776	RL27A_HUMAN	RPL27A	60S ribosomal protein L27a	148	77.197	54.0541	74.7356	68.6622	88.9096	103.053	118.274	103.412
P36957	ODO2_HUMAN	DLST	Dihydrolipoyllysine-residue succinyltransferase component of 2-oxoglutarate dehydrogenase complex, mitochondrial	453	159.734	13.245	32.5559	68.5115	16.1376	40.4021	47.2285	34.5894
P61313	RL15_HUMAN	RPL15	60S ribosomal protein L15	204	56.0056	63.7255	81.3299	67.0203	57.336	44.8582	57.2045	53.1329
Q9BRP8	PYM1_HUMAN	PYM1	Partner of Y14 and mago	204	68.4513	58.8235	72.2933	66.5227	107.505	29.9055	57.2045	64.8717
Q00341	VIGLN_HUMAN	HDLBP	Vigilin	1268	68.0784	61.5142	69.7847	66.4591	33.4385	16.8395	21.4743	23.9174
Q5JTH9	RRP12_HUMAN	RRP12	RRP12-like protein	1297	59.7048	60.9098	78.1737	66.2628	49.5999	37.6297	49.4861	45.5719
Q9UBQ5	EIF3K_HUMAN	EIF3K	Eukaryotic translation initiation factor 3 subunit K	218	58.2322	59.633	76.1069	64.6574	73.7741	41.9774	53.5308	56.4275
O75822	EIF3J_HUMAN	EIF3J	Eukaryotic translation initiation factor 3 subunit J	258	73.8059	69.7674	50.0169	64.5301	68.0032	82.7617	60.3087	70.3579
Q8N6M0	OTU6B_HUMAN	OTUD6B	OTU domain-containing protein 6B	293	64.9895	64.8464	62.9173	64.2511	49.9	31.2324	33.1903	38.1076
Q96CT7	CC124_HUMAN	CCDC124	Coiled-coil domain-containing protein 124	223	62.6192	58.296	66.1337	62.3496	65.5636	68.3937	78.4959	70.8178
Q00839	HNRPU_HUMAN	HNRNPU	Heterogeneous nuclear ribonucleoprotein U	825	60.0109	60.6061	62.5665	61.0612	62.0272	48.0663	49.5079	53.2005
P56537	IF6_HUMAN	EIF6	Eukaryotic translation initiation factor 6	245	56.9962	57.1429	67.7196	60.6196	65.6439	49.8018	71.4473	62.2977
P22626	ROA2_HUMAN	HNRNPA2B1	Heterogeneous nuclear ribonucleoproteins A2/B1	353	57.5393	59.4901	62.6678	59.8991	0	0	0	0
Q9UI30	TR112_HUMAN	TRMT112	Multifunctional methyltransferase subunit TRM112-like protein	125	60.9341	40	73.7391	58.2244	70.1793	48.8058	77.7982	65.5944
Q96AG4	LRC59_HUMAN	LRRC59	Leucine-rich repeat-containing protein 59	307	57.8907	58.6319	54.0433	56.8553	61.9117	29.8081	31.6768	41.1322
P40429	RL13A_HUMAN	RPL13A	60S ribosomal protein L13a	203	37.521	64.0394	63.5682	55.0429	57.6185	0	28.7432	28.7872
Q71UM5	RS27L_HUMAN	RPS27L	40S ribosomal protein S27-like	84	60.4505	59.5238	43.8923	54.6222	52.2167	36.3138	46.3084	44.9463
Q9Y3A5	SBDS_HUMAN	SBDS	Ribosome maturation protein SBDS	250	15.2335	52	88.487	51.9068	17.5448	12.2014	23.3394	17.6952
Q9BVS4	RIOK2_HUMAN	RIOK2	Serine/threonine-protein kinase RIO2	552	45.995	47.1014	56.7738	49.9567	23.8381	22.1041	10.5704	18.8375
Q9UQ80	PA2G4_HUMAN	PA2G4	Proliferation-associated protein 2G4	394	38.6638	50.7614	56.1465	48.5239	29.6867	23.2261	24.6822	25.865
P41214	EIF2D_HUMAN	EIF2D	Eukaryotic translation initiation factor 2D	584	36.9535	35.9589	63.1328	45.3484	25.0354	15.6697	23.3128	21.3393
Q14011	CIRBP_HUMAN	CIRBP	Cold-inducible RNA-binding protein	172	29.5224	29.0698	75.0253	44.5391	0	0	0	0
P84103	SRSF3_HUMAN	SRSF3	Serine/arginine-rich splicing factor 3	164	23.2218	42.6829	67.4443	44.4497	53.4903	37.1995	35.5784	42.0894
Q9NR30	DDX21_HUMAN	DDX21	Nucleolar RNA helicase 2	783	43.7745	40.8685	47.0876	43.9102	31.7435	27.2701	22.3558	27.1231
Q7L2H7	EIF3M_HUMAN	EIF3M	Eukaryotic translation initiation factor 3 subunit M	374	40.7314	40.107	49.2909	43.3764	0	0	0	0
Q9Y2R9	RT07_HUMAN	MRPS7	28S ribosomal protein S7, mitochondrial	242	26.2285	49.5868	53.3238	43.0464	0	0	0	0
Q12905	ILF2_HUMAN	ILF2	Interleukin enhancer-binding factor 2	390	42.3154	38.4615	47.2687	42.6819	41.2378	54.75	34.9094	43.6324
O43709	BUD23_HUMAN	BUD23	Probable 18S rRNA (guanine-N(7))-methyltransferase	281	36.1412	24.911	59.0438	40.032	0	0	0	0
Q9BUT9	MCRI2_HUMAN	MCRIP2	MAPK regulated corepressor interacting protein 2	160	23.8024	37.5	57.6087	39.637	18.2759	38.1295	36.4679	30.9577
P49674	KC1E_HUMAN	CSNK1E	Casein kinase I isoform epsilon	416	33.5675	36.0577	44.3144	37.9799	24.6021	21.9978	23.3769	23.3256
O95453	PARN_HUMAN	PARN	Poly(A)-specific ribonuclease PARN	639	37.7461	42.2535	31.7344	37.2447	11.4403	4.77365	9.13124	8.44839
P62854	RS26_HUMAN	RPS26	40S ribosomal protein S26	115	44.1552	34.7826	32.0605	36.9994	0	0	0	0
Q9NX58	LYAR_HUMAN	LYAR	Cell growth-regulating nucleolar protein	379	36.8445	29.0237	43.7765	36.5483	15.4308	16.0969	35.9226	22.4834
Q08211	DHX9_HUMAN	DHX9	ATP-dependent RNA helicase A	1270	26.9885	33.0709	47.9014	35.9869	31.0834	24.0186	33.6921	29.598
P40939	ECHA_HUMAN	HADHA	Trifunctional enzyme subunit alpha, mitochondrial	763	23.2929	45.8716	38.6575	35.9406	26.827	15.9914	17.8436	20.2207
Q13310	PABP4_HUMAN	PABPC4	Polyadenylate-binding protein 4	644	35.4818	31.0559	40.0756	35.5378	27.2435	33.1561	27.181	29.1935
P61221	ABCE1_HUMAN	ABCE1	ATP-binding cassette sub-family E member 1	599	25.4316	35.0584	43.0863	34.5254	14.6451	15.2773	29.223	19.7151
P78344	IF4G2_HUMAN	EIF4G2	Eukaryotic translation initiation factor 4 gamma 2	907	26.5929	31.9735	44.715	34.4272	19.3438	26.905	15.0107	20.4198
Q99729	ROAA_HUMAN	HNRNPAB	Heterogeneous nuclear ribonucleoprotein A/B	332	30.5894	33.1325	38.8685	34.1968	52.8459	18.3757	29.2915	33.5043
P12694	ODBA_HUMAN	BCKDHA	2-oxoisovalerate dehydrogenase subunit alpha, mitochondrial	445	77.0235	11.236	12.4279	33.5625	36.141	75.4022	43.7068	51.75
P05198	IF2A_HUMAN	EIF2S1	Eukaryotic translation initiation factor 2 subunit 1	315	32.2403	44.4444	23.4092	33.3647	0	0	0	0
Q15650	TRIP4_HUMAN	TRIP4	Activating signal cointegrator 1	581	28.4045	32.7022	38.0753	33.0607	22.6482	5.25019	16.738	14.8788
Q9NZI8	IF2B1_HUMAN	IGF2BP1	Insulin-like growth factor 2 mRNA-binding protein 1	577	35.2017	24.2634	38.3392	32.6015	27.8731	21.1463	30.3372	26.4522
Q6PKG0	LARP1_HUMAN	LARP1	La-related protein 1	1096	30.115	30.1095	37.0041	32.4095	34.6841	25.0486	21.2951	27.0093
P61254	RL26_HUMAN	RPL26	60S ribosomal protein L26	145	43.7745	27.5862	25.4273	32.2627	0	0	0	0
Q9BRS2	RIOK1_HUMAN	RIOK1	Serine/threonine-protein kinase RIO1	568	31.2895	26.4085	38.9467	32.2149	10.2963	10.7407	10.2726	10.4365
Q14103	HNRPD_HUMAN	HNRNPD	Heterogeneous nuclear ribonucleoprotein D0	355	28.6076	25.3521	41.5432	31.8343	0	0	0	0
P20042	IF2B_HUMAN	EIF2S2	Eukaryotic translation initiation factor 2 subunit 2	333	30.4976	33.033	27.6799	30.4035	8.78119	0	17.5221	8.76777
Q7Z417	NUFP2_HUMAN	NUFIP2	Nuclear fragile X mental retardation-interacting protein 2	695	27.3984	25.8993	37.1348	30.1442	0	0	0	0
Q02218	ODO1_HUMAN	OGDH	2-oxoglutarate dehydrogenase, mitochondrial	1023	85.6235	0.977517	3.60406	30.0684	0	8.94534	9.50613	6.15049
P02788	TRFL_HUMAN	LTF	Lactotransferrin	710	8.93987	42.2535	38.9467	30.0467	0	0	0	0
P08670	VIME_HUMAN	VIM	Vimentin	466	19.0692	19.3133	51.4275	29.9367	0	0	0	0
Q07065	CKAP4_HUMAN	CKAP4	Cytoskeleton-associated protein 4	602	35.8486	23.2558	30.6226	29.909	29.1442	15.2011	22.6157	22.3204
P35232	PHB_HUMAN	PHB	Prohibitin	272	32.67	29.4118	27.11	29.7306	26.8763	0	42.9034	23.2599
Q9UNQ2	DIM1_HUMAN	DIMT1	Probable dimethyladenosine transferase	313	24.3347	25.5591	35.3382	28.4107	0	0	0	0
Q9BVJ6	UT14A_HUMAN	UTP14A	U3 small nucleolar RNA-associated protein 14 homolog A	771	23.0512	25.9403	35.8653	28.2856	24.6523	11.8691	10.0906	15.5373
Q9BWF3	RBM4_HUMAN	RBM4	RNA-binding protein 4	364	20.9252	21.978	40.516	27.8064	8.03335	16.7602	16.0298	13.6078
Q04837	SSBP_HUMAN	SSBP1	Single-stranded DNA-binding protein, mitochondrial	148	25.7323	20.2703	37.3678	27.7901	39.5154	20.6105	39.4247	33.1836
Q9Y224	RTRAF_HUMAN	RTRAF	RNA transcription, translation and transport factor protein	244	26.0135	40.9836	15.1105	27.3692	0	0	0	0
Q9NSD9	SYFB_HUMAN	FARSB	Phenylalanine--tRNA ligase beta subunit	589	21.5528	28.8625	31.2984	27.2379	19.8583	10.3578	16.5106	15.5756
Q969S3	ZN622_HUMAN	ZNF622	Zinc finger protein 622	477	29.2748	25.1572	27.0531	27.1617	15.3257	6.39488	12.2324	11.3177
P13639	EF2_HUMAN	EEF2	Elongation factor 2	858	28.1116	20.979	32.2286	27.1064	44.3051	28.4416	29.469	34.0719
Q92615	LAR4B_HUMAN	LARP4B	La-related protein 4B	738	22.3618	28.4553	29.9753	26.9308	23.7735	16.5331	7.90632	16.071
O14979	HNRDL_HUMAN	HNRNPDL	Heterogeneous nuclear ribonucleoprotein D-like	420	15.1126	21.4286	43.8923	26.8112	13.9245	21.7883	13.8925	16.5351
Q14240	IF4A2_HUMAN	EIF4A2	Eukaryotic initiation factor 4A-II	407	21.8335	19.656	36.2354	25.9083	10.7769	29.979	19.115	19.957
Q96HS1	PGAM5_HUMAN	PGAM5	Serine/threonine-protein phosphatase PGAM5, mitochondrial	289	35.1408	27.6817	12.7576	25.1934	30.3544	42.2195	0	24.1913
Q12906	ILF3_HUMAN	ILF3	Interleukin enhancer-binding factor 3	894	25.5596	19.0157	30.9308	25.1687	16.3542	17.0602	13.0534	15.4893
O14874	BCKD_HUMAN	BCKDK	[3-methyl-2-oxobutanoate dehydrogenase [lipoamide]] kinase, mitochondrial	412	36.9746	9.70874	26.8468	24.51	35.4871	37.0189	18.883	30.463
Q04637	IF4G1_HUMAN	EIF4G1	Eukaryotic translation initiation factor 4 gamma 1	1599	20.6416	26.2664	26.5166	24.4749	27.4309	22.892	15.8126	22.0452
Q13243	SRSF5_HUMAN	SRSF5	Serine/arginine-rich splicing factor 5	272	18.6685	18.3824	33.8875	23.6461	0	0	0	0
P62258	1433E_HUMAN	YWHAE	14-3-3 protein epsilon	255	29.8697	11.7647	28.9173	23.5172	22.9344	35.8866	15.2545	24.6918
Q06830	PRDX1_HUMAN	PRDX1	Peroxiredoxin-1	199	19.1376	20.1005	27.7911	22.3431	0	0	0	0
O95793	STAU1_HUMAN	STAU1	Double-stranded RNA-binding protein Staufen homolog 1	577	24.2012	15.5979	25.5595	21.7862	20.2713	15.8598	10.1124	15.4145
P06730	IF4E_HUMAN	EIF4E	Eukaryotic translation initiation factor 4E	217	23.4002	13.8249	25.4859	20.9037	26.9506	0	17.9258	14.9588
P67809	YBOX1_HUMAN	YBX1	Nuclease-sensitive element-binding protein 1	324	19.5904	18.5185	22.759	20.2893	0	0	0	0
P17844	DDX5_HUMAN	DDX5	Probable ATP-dependent RNA helicase DDX5	614	12.4052	21.1726	27.0217	20.1998	9.52488	14.904	9.50303	11.3107
Q9BU76	MMTA2_HUMAN	MMTAG2	Multiple myeloma tumor-associated protein 2	263	24.1342	15.2091	21.0283	20.1239	0	0	0	0
Q13283	G3BP1_HUMAN	G3BP1	Ras GTPase-activating protein-binding protein 1	466	19.0692	23.6052	15.8238	19.4994	18.8249	13.0917	4.17372	12.0301
P11940	PABP1_HUMAN	PABPC1	Polyadenylate-binding protein 1	636	21.9561	18.8679	17.3913	19.4051	20.6897	14.3885	12.2324	15.7702
Q8IV48	ERI1_HUMAN	ERI1	3'-5' exoribonuclease 1	349	18.1871	17.192	21.1287	18.8359	20.9465	0	11.1459	10.6975
Q9Y3I0	RTCB_HUMAN	RTCB	tRNA-splicing ligase RtcB homolog	505	17.5965	23.7624	14.6018	18.6536	14.4759	24.1613	15.4056	18.0143
P04083	ANXA1_HUMAN	ANXA1	Annexin A1	346	3.66896	23.1214	26.6399	17.8101	12.6769	0	28.1063	13.5944
Q92499	DDX1_HUMAN	DDX1	ATP-dependent RNA helicase DDX1	740	13.7239	27.027	12.4559	17.7356	7.90308	12.3663	7.88495	9.38478
P11177	ODPB_HUMAN	PDHB	Pyruvate dehydrogenase E1 component subunit beta, mitochondrial	359	14.1444	11.1421	25.6752	16.9872	0	0	0	0
Q13151	ROA0_HUMAN	HNRNPA0	Heterogeneous nuclear ribonucleoprotein A0	305	12.4865	19.6721	18.1326	16.7637	0	0	0	0
P26641	EF1G_HUMAN	EEF1G	Elongation factor 1-gamma	437	23.2396	18.3066	8.43697	16.6611	0	0	0	0
P51991	ROA3_HUMAN	HNRNPA3	Heterogeneous nuclear ribonucleoprotein A3	378	16.7918	18.5185	14.6308	16.647	0	0	0	0
Q9BVP2	GNL3_HUMAN	GNL3	Guanine nucleotide-binding protein-like 3	549	16.1862	20.0364	13.4315	16.5514	23.9683	22.2248	10.6282	18.9405
Q9H1I8	ASCC2_HUMAN	ASCC2	Activating signal cointegrator 1 complex subunit 2	757	15.0927	14.531	19.4819	16.3685	7.7256	4.02954	5.13858	5.63124
Q00577	PURA_HUMAN	PURA	Transcriptional activator protein Pur-alpha	322	15.7697	21.7391	11.4502	16.3197	0	0	0	0
O14744	ANM5_HUMAN	PRMT5	Protein arginine N-methyltransferase 5	637	13.9501	20.4082	14.47	16.2761	0	0	0	0
O60506	HNRPQ_HUMAN	HNRNPQ	Heterogeneous nuclear ribonucleoprotein Q	623	16.3013	17.6565	14.7952	16.251	11.7341	4.89624	9.36575	8.66536
Q71RC2	LARP4_HUMAN	LARP4	La-related protein 4	724	17.534	19.337	10.185	15.6853	10.0972	4.2132	5.3728	6.56106
P10809	CH60_HUMAN	HSP60	60 kDa heat shock protein, mitochondrial	573	15.5083	12.2164	19.3034	15.676	0	0	0	0
P61978	HNRPK_HUMAN	HNRNPK	Heterogeneous nuclear ribonucleoprotein K	463	21.9345	12.959	11.9448	15.6128	0	0	0	0
P07814	SYEP_HUMAN	EPRS	Bifunctional glutamate/proline--tRNA ligase	1512	13.4335	16.5344	15.85	15.2726	18.3726	18.1569	10.2908	15.6067
Q9BQA1	MEP50_HUMAN	MEP50	Methylosome protein 50	342	14.8475	14.6199	16.1709	15.2127	17.1002	17.8384	11.374	15.4375
O76021	RL1D1_HUMAN	RSL1D1	Ribosomal L1 domain-containing protein 1	490	10.3629	18.3673	15.0488	14.593	8.95144	0	7.93859	5.63001
P05455	LA_HUMAN	SSB	Lupus La protein	408	21.78	17.1569	4.51833	14.4851	0	0	0	0
P78316	NOP14_HUMAN	NOP14	Nucleolar protein 14	857	7.40642	16.3361	19.3597	14.3674	0	0	0	0
P55084	ECHB_HUMAN	HADHB	Trifunctional enzyme subunit beta, mitochondrial	474	16.0691	18.9873	7.77839	14.2783	18.5072	6.43536	28.723	17.8885
Q99848	EBP2_HUMAN	EBNA1BP2	Probable rRNA-processing protein EBP2	306	8.29713	16.3399	18.0733	14.2368	28.668	19.937	25.4242	24.6764
Q8N3C0	ASCC3_HUMAN	ASCC3	Activating signal cointegrator 1 complex subunit 3	2202	13.2596	12.7157	15.9065	13.9606	11.2875	5.54107	5.2996	7.37607
O14730	RIOK3_HUMAN	RIOK3	Serine/threonine-protein kinase RIO3	519	4.89195	15.4143	21.3119	13.8727	14.0854	11.7548	7.49501	11.1117
Q8N1G4	LRC47_HUMAN	LRRC47	Leucine-rich repeat-containing protein 47	583	15.2422	10.2916	15.8103	13.7814	7.52351	10.4644	10.0083	9.33207
P05388	RLA0_HUMAN	RPLP0	60S acidic ribosomal protein P0	317	16.0184	25.2366	0	13.7517	18.4488	9.62259	18.4065	15.4926
Q9BVI4	NOC4L_HUMAN	NOC4L	Nucleolar complex protein 4 homolog	516	7.38059	15.5039	17.8632	13.5825	0	0	0	0
Q08J23	NSUN2_HUMAN	NSUN2	tRNA (cytosine(34)-C(5))-methyltransferase	767	16.551	14.3416	9.61397	13.5022	11.4373	11.931	10.1432	11.1705
Q96PK6	RBM14_HUMAN	RBM14	RNA-binding protein 14	669	9.48775	8.96861	22.0446	13.5003	10.9273	18.2383	8.72177	12.6291
P12956	XRCC6_HUMAN	XRCC6	X-ray repair cross-complementing protein 6	609	12.507	6.56814	21.1894	13.4215	12.0039	10.0176	12.7747	11.5987
P22087	FBRL_HUMAN	FBL	rRNA 2'-O-methyltransferase fibrillarin	321	19.7735	3.11526	17.2288	13.3725	0	0	0	0
O00425	IF2B3_HUMAN	IGF2BP3	Insulin-like growth factor 2 mRNA-binding protein 3	579	10.9625	13.8169	12.7356	12.505	17.6761	21.0733	10.0775	16.2756
P52272	HNRPM_HUMAN	HNRNPM	Heterogeneous nuclear ribonucleoprotein M	730	13.9119	8.21918	15.1519	12.4277	8.01134	12.5357	5.32864	8.62523
P07355	ANXA2_HUMAN	ANXA2	Annexin A2	339	11.2342	8.84956	16.314	12.1326	8.62578	17.9962	22.9493	16.5238
Q92841	DDX17_HUMAN	DDX17	Probable ATP-dependent RNA helicase DDX17	729	12.1896	10.9739	12.6439	11.9358	4.01116	8.36861	5.33595	5.90524
Q9BUJ2	HNRL1_HUMAN	HNRNPUL1	Heterogeneous nuclear ribonucleoprotein U-like protein 1	856	14.8302	9.34579	10.768	11.648	3.41605	3.5635	4.54429	3.84128
P04843	RPN1_HUMAN	RPN1	Dolichyl-diphosphooligosaccharide--protein glycosyltransferase subunit 1	607	6.27411	9.88468	18.2222	11.4603	9.63472	15.0759	16.021	13.5772
Q14444	CAPR1_HUMAN	CAPRIN1	Caprin-1	709	10.743	9.87306	13.0006	11.2055	0	0	0	0
Q9UMS4	PRP19_HUMAN	PRPF19	Pre-mRNA-processing factor 19	504	10.0751	11.9048	10.9731	10.9843	0	0	0	0
P52292	IMA1_HUMAN	KPNA2	Importin subunit alpha-1	529	2.39974	9.4518	20.909	10.9202	8.29151	17.2988	7.35332	10.9812
Q9UN86	G3BP2_HUMAN	G3BP2	Ras GTPase-activating protein-binding protein 2	482	10.5349	10.3734	11.4739	10.7941	0	0	0	0
Q9BZE4	NOG1_HUMAN	NOG1	Nucleolar GTP-binding protein 1	634	4.00461	7.88644	20.3539	10.7483	18.4488	9.62259	15.3388	14.4701
Q8IY37	DHX37_HUMAN	DHX37	Probable ATP-dependent RNA helicase DHX37	1157	6.5832	9.50735	15.9333	10.6746	0	0	0	0
P12814	ACTN1_HUMAN	ACTN1	Alpha-actinin-1	892	11.3853	11.2108	8.26672	10.2876	0	0	0	0
P41091	IF2G_HUMAN	EIF2S3	Eukaryotic translation initiation factor 2 subunit 3	472	8.06861	10.5932	11.717	10.1263	3.0976	19.3879	12.362	11.6158
Q8TDN6	BRX1_HUMAN	BRIX1	Ribosome biogenesis protein BRX1 homolog	353	3.59621	5.66572	20.8893	10.0504	12.4255	8.64125	16.5294	12.532
P48634	PRC2A_HUMAN	PRRC2A	Protein PRRC2A	2157	8.82796	10.663	10.2558	9.91557	7.45608	4.2425	8.11525	6.60461
P51398	RT29_HUMAN	DAP3	28S ribosomal protein S29, mitochondrial	398	9.5688	10.0503	9.26371	9.62759	18.3677	7.66422	19.5473	15.1931
P14868	SYDC_HUMAN	DARS	Aspartate--tRNA ligase, cytoplasmic	501	7.60156	9.98004	11.0388	9.54013	0	0	0	0
Q5JSZ5	PRC2B_HUMAN	PRRC2B	Protein PRRC2B	2229	7.40377	10.3185	9.92451	9.2156	7.21523	4.10546	4.36284	5.22785
P09874	PARP1_HUMAN	PARP1	Poly [ADP-ribose] polymerase 1	1014	8.76354	7.88955	10.9082	9.18708	5.76753	9.02473	5.7543	6.84886
Q9Y285	SYFA_HUMAN	FARSA	Phenylalanine--tRNA ligase alpha subunit	508	9.99576	9.84252	7.25779	9.03202	0	0	0	0
Q9Y520	PRC2C_HUMAN	PRRC2C	Protein PRRC2C	2896	6.1369	11.395	9.5484	9.02678	5.55344	4.2132	5.3728	5.04648
P13010	XRCC5_HUMAN	XRCC5	X-ray repair cross-complementing protein 5	732	8.67118	8.19672	10.0737	8.98052	0	0	0	0
P46087	NOP2_HUMAN	NOP2	Probable 28S rRNA (cytosine(4447)-C(5))-methyltransferase	812	4.69013	6.15764	15.8921	8.91327	7.20231	11.2698	4.79053	7.75421
Q14684	RRP1B_HUMAN	RRP1B	Ribosomal RNA processing protein 1 homolog B	758	5.02425	7.91557	12.1601	8.36666	0	0	0	0
P54136	SYRC_HUMAN	RARS	Arginine--tRNA ligase, cytoplasmic	660	5.77028	10.6061	8.37945	8.25193	0	0	0	0
Q8NCA5	FA98A_HUMAN	FAM98A	Protein FAM98A	518	9.80279	7.72201	7.11768	8.21416	0	0	0	0
Q9BTD8	RBM42_HUMAN	RBM42	RNA-binding protein 42	480	10.5788	6.25	7.68116	8.17	15.2299	6.35492	8.10398	9.89626
Q15046	SYK_HUMAN	KARS1	Lysine--tRNA ligase	597	10.632	6.70017	6.17581	7.83599	2.44903	15.3284	9.77364	9.1837
P23588	IF4B_HUMAN	EIF4B	Eukaryotic translation initiation factor 4B	611	6.23303	9.81997	6.0343	7.36243	4.78582	14.9772	9.54969	9.77091
Q5VYS8	TUT7_HUMAN	TUT7	Terminal uridylyltransferase 7	1495	9.34052	6.02007	6.16548	7.17535	4.88986	4.08075	6.50486	5.15849
Q7Z478	DHX29_HUMAN	DHX29	ATP-dependent RNA helicase DHX29	1369	4.63645	8.76552	8.07952	7.1605	0	0	0	0
P56192	SYMC_HUMAN	MARS	Methionine--tRNA ligase, cytoplasmic	900	1.41051	8.88889	10.2415	6.84698	11.3716	3.38929	6.48318	7.08137
O00541	PESC_HUMAN	PES1	Pescadillo homolog	588	4.31789	6.80272	9.4055	6.84204	0	0	0	0
Q9BQG0	MBB1A_HUMAN	MYBBP1A	Myb-binding protein 1A	1328	6.69144	3.76506	9.71713	6.72454	4.40382	2.29696	2.92915	3.20998
P47897	SYQ_HUMAN	QARS	Glutamine--tRNA ligase	775	0	10.3226	9.51473	6.61244	5.65962	0	5.01924	3.55962
P35998	PRS7_HUMAN	PSMC2	26S proteasome regulatory subunit 7	433	0	6.92841	12.7724	6.56692	6.75321	14.0894	13.4754	11.4394
Q7Z2W4	ZCCHV_HUMAN	ZC3HAV1	Zinc finger CCCH-type antiviral protein 1	902	2.81477	6.65188	10.2188	6.56183	6.48368	6.76355	2.15627	5.1345
Q96SB4	SRPK1_HUMAN	SRPK1	SRSF protein kinase 1	655	3.87622	3.05344	11.2579	6.06251	11.1608	9.31408	8.90819	9.79436
Q99613	EIF3C_HUMAN	EIF3C	Eukaryotic translation initiation factor 3 subunit C	913	2.78086	3.28587	12.1149	6.06053	9.60834	10.0231	8.52116	9.38419
P41252	SYIC_HUMAN	IARS	Isoleucine--tRNA ligase, cytoplasmic	1262	4.02365	6.33914	7.3038	5.88886	4.63413	4.83417	4.6235	4.69727
P78347	GTF2I_HUMAN	GTF2I	General transcription factor II-I	998	5.08802	7.01403	5.54152	5.88119	7.32499	12.2259	7.79541	9.11543
P27816	MAP4_HUMAN	MAP4	Microtubule-associated protein 4	1152	6.61178	3.47222	6.40097	5.49499	6.34579	13.2394	8.44164	9.34228
Q86UK7	ZN598_HUMAN	ZNF598	E3 ubiquitin-protein ligase ZNF598	904	5.61708	6.63717	4.07849	5.44425	0	0	0	0
Q7L2E3	DHX30_HUMAN	DHX30	Putative ATP-dependent RNA helicase DHX30	1194	5.316	5.86265	4.63185	5.27017	3.67354	5.10948	3.25788	4.01363
O60716	CTND1_HUMAN	CTNND1	Catenin delta-1	968	5.24571	4.13223	3.80884	4.39559	4.53121	9.45359	8.037	7.3406
Q9H6R4	NOL6_HUMAN	NOL6	Nucleolar protein 6	1146	5.53866	3.4904	3.21724	4.0821	0	0	0	0
Q6Y7W6	GGYF2_HUMAN	GIGYF2	GRB10-interacting GYF protein 2	1299	1.95452	3.84911	4.25746	3.3537	0	0	0	0
P12270	TPR_HUMAN	TPR	Nucleoprotein TPR	2363	0	2.11595	2.34043	1.48546	0.618734	3.87265	3.29235	2.59458
O95714	HERC2_HUMAN	HERC2	E3 ubiquitin-protein ligase HERC2	4834	0.787833	1.24121	1.90678	1.31194	1.81473	0.631022	0.804698	1.08348
Q12802	AKP13_HUMAN	AKAP13	A-kinase anchor protein 13	2813	0	0	0	0	1.03951	3.25314	0	1.43088
Q8N163	CCAR2_HUMAN	CCAR2	Cell cycle and apoptosis regulator protein 2	923	0	0	0	0	6.33616	6.60966	10.536	7.82729
Q7Z739	YTHD3_HUMAN	YTHDF3	YTH domain-containing family protein 3	585	0	0	0	0	4.99853	10.4286	6.64942	7.35884
O43175	SERA_HUMAN	PHGDH	D-3-phosphoglycerate dehydrogenase	533	0	0	0	0	13.7155	5.723	14.5963	11.3449
P12277	KCRB_HUMAN	CKB	Creatine kinase B-type	381	0	0	0	0	7.6749	16.0124	10.2097	11.299
Q12904	AIMP1_HUMAN	AIMP1	Aminoacyl tRNA synthase complex-interacting multifunctional protein 1	312	0	0	0	0	18.7445	9.77679	12.4677	13.663
1Spectral counts normalized to protein length (spectral counts per 1000 amino acids) and normalized to spectral counts of the bait (USP16) identified in USP16-StHA_II after filtering against the HASt-GFP control
